# Supplementary material for: Effect of 6 months of hybrid closed-loop insulin delivery in adults with type 1 diabetes: a randomised controlled trial protocol
Source: PubMed Central journal article supplement — BMJ Open. 2018 Jun 9;8(6):e020274. doi: 10.1136/bmjopen-2017-020274 (PMC6009467; doi:10.1136/bmjopen-2017-020274), 2018-06-09
Supplement: bmjopen-2017-020274.draft_revisions.pdf [file bmjopen-2017-020274.draft_revisions.pdf]

# BMJ Open

BMJ Open is committed to open peer review. As part of this commitment we make the peer review history of every article we publish publicly available.

When an article is published we post the peer reviewers' comments and the authors' responses online. We also post the versions of the paper that were used during peer review. These are the versions that the peer review comments apply to.

The versions of the paper that follow are the versions that were submitted during the peer review process. They are not the versions of record or the final published versions. They should not be cited or distributed as the published version of this manuscript.

BMJ Open is an open access journal and the full, final, typeset and author-corrected version of record of the manuscript is available on our site with no access controls, subscription charges or pay-per-view fees (<http://bmjopen.bmj.com>).

If you have any questions on BMJ Open's open peer review process please email [info.bmjopen@bmj.com](mailto:info.bmjopen@bmj.com)

# BMJ Open

## Effectiveness of 6 months hybrid closed-loop insulin delivery on glucose control, psychosocial well-being, sleep and cognition in adults with type 1 diabetes: a randomised controlled trial protocol

|                               |                                                                                                                                                                                                                                                                                                                                                                                                                                                                                                                                                                                                                                                                                                                                                                                                                                                                                                                                                                                                                                                                                                                                                                                                                                                                                                                                                                                                                                                                                                                                                                                                                                                                                                                                                                                                                                                                                                                                                                                                                                                                                                                                                                                                                                                                                     |
|-------------------------------|-------------------------------------------------------------------------------------------------------------------------------------------------------------------------------------------------------------------------------------------------------------------------------------------------------------------------------------------------------------------------------------------------------------------------------------------------------------------------------------------------------------------------------------------------------------------------------------------------------------------------------------------------------------------------------------------------------------------------------------------------------------------------------------------------------------------------------------------------------------------------------------------------------------------------------------------------------------------------------------------------------------------------------------------------------------------------------------------------------------------------------------------------------------------------------------------------------------------------------------------------------------------------------------------------------------------------------------------------------------------------------------------------------------------------------------------------------------------------------------------------------------------------------------------------------------------------------------------------------------------------------------------------------------------------------------------------------------------------------------------------------------------------------------------------------------------------------------------------------------------------------------------------------------------------------------------------------------------------------------------------------------------------------------------------------------------------------------------------------------------------------------------------------------------------------------------------------------------------------------------------------------------------------------|
| Journal:                      | <i>BMJ Open</i>                                                                                                                                                                                                                                                                                                                                                                                                                                                                                                                                                                                                                                                                                                                                                                                                                                                                                                                                                                                                                                                                                                                                                                                                                                                                                                                                                                                                                                                                                                                                                                                                                                                                                                                                                                                                                                                                                                                                                                                                                                                                                                                                                                                                                                                                     |
| Manuscript ID                 | bmjopen-2017-020274                                                                                                                                                                                                                                                                                                                                                                                                                                                                                                                                                                                                                                                                                                                                                                                                                                                                                                                                                                                                                                                                                                                                                                                                                                                                                                                                                                                                                                                                                                                                                                                                                                                                                                                                                                                                                                                                                                                                                                                                                                                                                                                                                                                                                                                                 |
| Article Type:                 | Protocol                                                                                                                                                                                                                                                                                                                                                                                                                                                                                                                                                                                                                                                                                                                                                                                                                                                                                                                                                                                                                                                                                                                                                                                                                                                                                                                                                                                                                                                                                                                                                                                                                                                                                                                                                                                                                                                                                                                                                                                                                                                                                                                                                                                                                                                                            |
| Date Submitted by the Author: | 26-Oct-2017                                                                                                                                                                                                                                                                                                                                                                                                                                                                                                                                                                                                                                                                                                                                                                                                                                                                                                                                                                                                                                                                                                                                                                                                                                                                                                                                                                                                                                                                                                                                                                                                                                                                                                                                                                                                                                                                                                                                                                                                                                                                                                                                                                                                                                                                         |
| Complete List of Authors:     | <p>McAuley, Sybil; University of Melbourne, Department of Medicine; St Vincent's Hospital Melbourne, Department of Endocrinology and Diabetes<br/> de Bock, Martin; Princess Margaret Hospital for Children, Department of Endocrinology and Diabetes; University of Western Australia, Telethon Kids Institute</p> <p>Sundararajan, Vijaya; University of Melbourne, Department of Medicine<br/> Bach, Leon; Alfred Hospital, Department of Endocrinology and Diabetes; Monash University, Department of Medicine (Alfred)</p> <p>Burt, Morton; Flinders Medical Centre, Southern Adelaide Diabetes and Endocrine Services; Flinders University, School of Medicine<br/> Cohen, Neale; Baker Heart and Diabetes Institute</p> <p>Colman, Peter; Royal Melbourne Hospital, Department of Endocrinology and Diabetes</p> <p>Holmes-Walker, Deborah; Westmead Hospital, Department of Endocrinology and Diabetes; University of Sydney, Sydney Medical School</p> <p>Jenkins, Alicia; University of Melbourne, Department of Medicine; St Vincent's Hospital Melbourne, Department of Endocrinology and Diabetes</p> <p>Kaye, Joey; Sir Charles Gairdner Hospital, Department of Endocrinology and Diabetes</p> <p>Keech, Anthony; University of Sydney, NHMRC Clinical Trials Centre</p> <p>MacIsaac, Richard J.; University of Melbourne, Department of Medicine; St Vincent's Hospital Melbourne, Department of Endocrinology and Diabetes</p> <p>McCallum, Roland; Royal Hobart Hospital, Department of Endocrinology and Diabetes</p> <p>Speight, Jane; The Australian Centre for Behavioural Research in Diabetes; Deakin University, School of Psychology</p> <p>Stranks, Stephen; Flinders Medical Centre, Southern Adelaide Diabetes and Endocrine Services; Flinders University, School of Medicine</p> <p>Ward, Glenn; St Vincent's Hospital Melbourne, Department of Endocrinology and Diabetes; University of Melbourne, Department of Pathology</p> <p>Jones, Timothy; Princess Margaret Hospital for Children, Department of Endocrinology and Diabetes; University of Western Australia, Telethon Kids Institute</p> <p>O'Neal, David; University of Melbourne, Department of Medicine; St Vincent's Hospital Melbourne, Department of Endocrinology and Diabetes</p> |
| Keywords:                     | Type 1 diabetes, Closed loop, Adults                                                                                                                                                                                                                                                                                                                                                                                                                                                                                                                                                                                                                                                                                                                                                                                                                                                                                                                                                                                                                                                                                                                                                                                                                                                                                                                                                                                                                                                                                                                                                                                                                                                                                                                                                                                                                                                                                                                                                                                                                                                                                                                                                                                                                                                |

1  
2  
3  
4  
5  
6  
7  
8  
9  
10  
11  
12  
13  
14  
15  
16  
17  
18  
19  
20  
21  
22  
23  
24  
25  
26  
27  
28  
29  
30  
31  
32  
33  
34  
35  
36  
37  
38  
39  
40  
41  
42  
43  
44  
45  
46  
47  
48  
49  
50  
51  
52  
53  
54  
55  
56  
57  
58  
59  
60

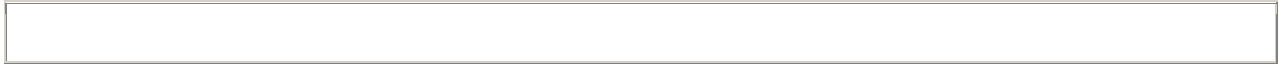

SCHOLARONE™  
Manuscripts

For peer review only

## **Effectiveness of 6 months hybrid closed-loop insulin delivery on glucose control, psychosocial well-being, sleep and cognition in adults with type 1 diabetes: a randomised controlled trial protocol**

Sybil A McAuley<sup>1,2</sup>, Martin I de Bock<sup>3,4,5</sup>, Vijaya Sundararajan<sup>1</sup>, Leon A Bach<sup>6,7</sup>, Morton G Burt<sup>8,9</sup>, Neale D Cohen<sup>10</sup>, Peter G Colman<sup>11</sup>, D Jane Holmes-Walker<sup>12,13</sup>, Alicia J Jenkins<sup>1,2,14</sup>, Joey Kaye<sup>15</sup>, Anthony C Keech<sup>14</sup>, Richard J MacIsaac<sup>1,2</sup>, Roland W McCallum<sup>16</sup>, Jane Speight<sup>17,18</sup>, Stephen N Stranks<sup>8,9</sup>, Glenn M Ward<sup>2,19</sup>, Timothy W Jones<sup>3,4,5</sup>, David N O'Neal<sup>1,2</sup>, for the Australian JDRF Closed-Loop Research Group\*

1. Department of Medicine, University of Melbourne, Melbourne, Australia
2. Department of Endocrinology and Diabetes, St Vincent's Hospital Melbourne, Melbourne, Australia
3. Department of Endocrinology and Diabetes, Princess Margaret Hospital for Children, Perth, Australia
4. Telethon Kids Institute, University of Western Australia, Perth, Australia
5. School of Paediatrics and Child Health, University of Western Australia, Perth, Australia
6. Department of Endocrinology and Diabetes, Alfred Hospital, Melbourne, Australia
7. Department of Medicine (Alfred), Monash University, Melbourne, Australia
8. Southern Adelaide Diabetes and Endocrine Services, Flinders Medical Centre, Adelaide, Australia
9. School of Medicine, Flinders University, Adelaide, Australia
10. Baker Heart and Diabetes Institute, Melbourne, Australia
11. Department of Diabetes and Endocrinology, Royal Melbourne Hospital, Melbourne, Australia
12. Department of Diabetes and Endocrinology, Westmead Hospital, Sydney, Australia
13. Sydney Medical School, University of Sydney, Sydney, Australia
14. NHMRC Clinical Trials Centre, University of Sydney, Sydney, Australia
15. Department of Endocrinology and Diabetes, Sir Charles Gairdner Hospital, Perth, Australia
16. Department of Diabetes and Endocrinology, Royal Hobart Hospital, Hobart, Australia
17. Australian Centre for Behavioural Research in Diabetes, Melbourne, Australia
18. School of Psychology, Deakin University, Geelong, Australia
19. Department of Pathology, St Vincent's Hospital Melbourne, Melbourne, Australia

\* Members of the Australian JDRF Closed-Loop Research Group are listed below

1  
2  
3 **Correspondence to**

4 Associate Professor David O’Neal

5  
6 Department of Medicine, University of Melbourne, St Vincent’s Hospital Melbourne

7  
8 PO Box 2900, Fitzroy VIC 3065, Australia

9  
10 Email: dno@unimelb.edu.au

11  
12 Telephone: +61 3 9231 2211

13  
14  
15  
16  
17 **Word count:** 3,981 words

18  
19  
20  
21  
22  
23  
24  
25  
26  
27  
28  
29  
30  
31  
32  
33  
34  
35  
36  
37  
38  
39  
40  
41  
42  
43  
44  
45  
46  
47  
48  
49  
50  
51  
52  
53  
54  
55  
56  
57  
58  
59  
60

For peer review only

## ABSTRACT

### Introduction

Manual determination of insulin dosing largely fails to optimise glucose control in type 1 diabetes. Automated insulin delivery via closed-loop systems has improved glucose control in short-term studies. Longer-term home-based studies of closed-loop system effects on glucose, psychosocial well-being, sleep and cognition are merited.

### Methods and analysis

This open-label, seven-centre, randomised controlled parallel group clinical trial will compare home-based hybrid closed-loop versus standard diabetes therapy in Australia. One hundred and twenty adults aged  $\geq 25$  years with type 1 diabetes using intensive insulin therapy ( $n=60$  via multiple daily injections;  $n=60$  via insulin pump) will undertake a run-in period including diabetes and carbohydrate-counting education, clinical optimisation and baseline data collection. Participants will then be randomised 1:1 either to 26 weeks of MiniMed™ 670G hybrid closed-loop system therapy (Medtronic, Northridge, CA, USA) or continuation of their current diabetes therapy. The hybrid closed-loop system delivers insulin automatically to address basal requirements and correct to target glucose level, while bolus doses for meals require user initiation and carbohydrate estimation. Analysis will be intention-to-treat, with the primary outcome time in continuous glucose monitoring (CGM) target range (3.9–10.0 mmol/L) during the final 3 weeks of intervention. Secondary outcomes include: other CGM parameters, HbA<sub>1c</sub>, severe hypoglycaemia, psychosocial well-being, sleep, cognition, electrocardiography, costs, quality of life, biomarkers of vascular health and hybrid closed-loop system performance. Semi-structured interviews will assess the expectations and experiences of a sub-group of hybrid closed-loop users.

### Ethics and dissemination

The study has Human Research Ethics Committee approval. The study will be conducted in accordance with the principles of the Declaration of Helsinki and Good Clinical Practice. Results will be disseminated at scientific conferences and via peer-reviewed publications.

### Trial registration number

ACTRN12617000520336, pre-results

### Strengths and limitations of the study

- Multi-centre, randomised controlled parallel group trial of 26 weeks home-based hybrid closed-loop versus standard therapy
- The study emphasises education and clinical optimisation for all participants pre-randomisation, and the visit schedule is identical for both groups
- Broad outcomes will be assessed in addition to glucose control: psychosocial, sleep, cognition, electrocardiography, vascular health biomarkers and health economic measures
- The standard therapy comparator includes either multiple daily insulin injections or insulin pump therapy while excluding real-time continuous glucose monitoring, thereby reflecting current practice in Australia for most adults with type 1 diabetes
- This study of adults aged  $\geq 25$  years has glucose end-points aligned with a concurrent study examining hybrid closed-loop for 12 to  $< 25$  year-olds, thereby facilitating comparison of metabolic outcomes between the two populations

## INTRODUCTION

Advances in type 1 diabetes insulin regimens and glucose monitoring have occurred over recent decades, facilitating improved glucose control and resulting in better health and quality of life.<sup>1-4</sup> The long-term vascular complications of type 1 diabetes are reduced by intensive insulin therapy compared with less intensive therapy.<sup>1-2</sup> Consequently, intensive insulin therapy—with subcutaneous administration via either multiple daily injections (MDI) or insulin pump therapy (IPT)—is a core strategy in current type 1 diabetes management.<sup>5</sup> Nevertheless, even with modern therapies, only 20–30% of adults with type 1 diabetes achieve HbA<sub>1c</sub> targets<sup>6,7</sup>, and long-term vascular complications and reduced life expectancy continue to be a reality for people with type 1 diabetes.<sup>8,9</sup>

Insulin requirements can vary unpredictably. They are impacted by time of day, meals, exercise, illness and antecedent hypoglycaemia. Manual determination of insulin dosing by people with type 1 diabetes requires continuous vigilance to maintain glucose levels within a healthy range. Insulin dosing decisions carry cognitive and emotional burden, and may be inconsistent due to fatigue, distress, fluctuating glucose levels or coexistent fear of hypoglycaemia. Hence, manual determination of insulin dosing represents an imperfect strategy to optimise glucose control. Further advances in technology are required to improve the match of insulin delivered to individuals' varying insulin requirements, and to minimise the burden of type 1 diabetes.

Closed-loop systems are designed to maintain glucose levels at a predetermined target by linking continuous glucose monitoring (CGM) information with an insulin dosing algorithm for automated subcutaneous insulin delivery by a pump.<sup>10</sup> These systems are being developed to address the need for improving glucose control while reducing the burden associated with treatment regimens. There is increasing scientific literature reporting improved glucose control with short-term use of closed-loop systems (up to 3 months) compared with conventional insulin pumps.<sup>11-14</sup> A recent meta-analysis of outpatient randomised controlled trials with intervention periods ranging from 4 days to 12 weeks reported that single-hormone (insulin alone) closed-loop systems improve time-in-target glucose range and reduce time spent in hypoglycaemia compared with conventional IPT (with/without CGM).<sup>15</sup> Overall, time-in-target glucose range had a mean (95% confidence interval) absolute increase of 11.1% (6.9, 15.2), and the time spent in hypoglycaemia had an absolute reduction of 1.9% (0.4, 3.4). Studies in this meta-analysis used 'hybrid closed-loop' systems with automated insulin delivery to address basal requirements and correct to target glucose, and user-initiated



1  
2  
3 bolus insulin to address carbohydrate consumption. Results from a short-term randomised  
4 crossover study challenging a closed-loop system with both moderate- and high-intensity  
5 exercise indicated that closed-loop glucose control was safe; only a single episode of mild  
6 hypoglycaemia occurred and marked hyperglycaemic excursions were limited.<sup>16</sup>  
7  
8

9  
10 For individuals with type 1 diabetes, both hypoglycaemia and hyperglycaemia can affect  
11 physical and emotional well-being, quality of life, and activities of daily living such as  
12 driving.<sup>4 17-19</sup> Moreover, type 1 diabetes places significant burden on caregivers, families,  
13 workplaces and health services.<sup>20-22</sup> Closed-loop technology has shown promise to address  
14 the limitations of current therapy in relation to these burdens.<sup>23</sup>  
15  
16

17  
18 HbA<sub>1c</sub>, a measurement of average glycaemia during the preceding 10–12 weeks, predicts the  
19 risk of developing long-term complications and is valuable for assessing glycaemic trends in  
20 populations over time.<sup>1 2 24</sup> However, HbA<sub>1c</sub> cannot provide information about glucose  
21 variability or time-in-target glucose range, and is even considered an unreliable indicator of  
22 an individual's mean glucose.<sup>25</sup> A recent large longitudinal registry study reported lower  
23 cardiovascular and all-cause mortality in individuals using IPT compared with MDI, even  
24 without between-group differences in HbA<sub>1c</sub>.<sup>26</sup> The mortality difference observed may have  
25 been attributable to factors such as time-in-target glucose range or glucose variability (not  
26 reflected in HbA<sub>1c</sub>). Consequently, HbA<sub>1c</sub> may be of limited value in comparison with CGM  
27 when assessing an individual's glucose levels in response to automated closed-loop insulin  
28 delivery.  
29  
30  
31  
32  
33  
34  
35

36  
37 With short-term studies of closed-loop systems (conducted in controlled and home settings)  
38 demonstrating improvements in glucose control,<sup>15</sup> it remains to be determined whether these  
39 findings are sustained in the longer term in the home setting and whether diabetes-related  
40 vascular complications may be influenced. Longer-term home-based studies—with closed-  
41 loop implemented day and night—are required. In addition, the impact of closed-loop insulin  
42 delivery on patient-reported outcomes such as fear of hypoglycaemia, treatment satisfaction,  
43 sleep quality and cognition remains a significant gap in the evidence base.<sup>27</sup> Finally, the  
44 benefits associated with this new technology need to be balanced against its cost.  
45  
46  
47  
48  
49

50  
51 In Australia, the government presently subsidises the purchase of insulin, injection needles,  
52 blood glucose monitoring strips and insulin pump delivery consumables for people with type  
53 1 diabetes.<sup>28</sup> Insulin pumps are not government-subsidised, but are available via either direct  
54 purchase or in conjunction with a private health insurance fund. CGM is government-  
55  
56  
57  
58  
59  
60

1  
2  
3 subsidised only for eligible individuals under 21 years of age.<sup>29</sup> As a result, only a small  
4 fraction of adults with type 1 diabetes use CGM on a regular basis. Hence, standard diabetes  
5 therapy for adults in Australia currently involves subcutaneous intensive insulin therapy  
6 delivered via either MDI or pump, together with finger-prick blood glucose monitoring.  
7  
8

9  
10 We hypothesise that hybrid closed-loop insulin delivery compared with manual insulin  
11 dosing will improve glucose control and non-glucose outcomes for adults with type 1  
12 diabetes. The overall aim of the study is to evaluate the effectiveness of 6 months of hybrid  
13 closed-loop insulin delivery on glucose control, psychosocial well-being, sleep quality,  
14 cognition and markers of vascular disease risk compared with standard diabetes therapy for  
15 adults with type 1 diabetes.  
16  
17  
18

## 19 20 **METHODS AND ANALYSIS**

### 21 22 **Overview**

23  
24 This open-label, randomised controlled parallel group clinical trial will compare 26 weeks of  
25 hybrid closed-loop therapy versus ‘standard therapy’ for 120 adults (aged  $\geq 25$  years) with  
26 type 1 diabetes (protocol version 2.0, dated 29 March 2017). The standard therapy  
27 comparator consists of insulin delivered via either MDI or IPT, without real-time continuous  
28 glucose monitoring (RT-CGM), and was chosen to reflect current self-management of type 1  
29 diabetes among adults in Australia.  
30  
31  
32  
33

34  
35 The study is being conducted at seven university hospitals across Australia. The University of  
36 Melbourne is the coordinating academic institution, with St Vincent’s Hospital Melbourne  
37 (Melbourne) the study sponsor and lead clinical site. Other clinical sites are: Flinders Medical  
38 Centre (Adelaide), Royal Hobart Hospital (Hobart), Royal Melbourne Hospital (Melbourne),  
39 Sir Charles Gairdner Hospital (Perth), The Alfred and Baker Heart and Diabetes Institute  
40 (Melbourne) and Westmead Hospital (Sydney). Other academic institutions involved are  
41 Sydney University and Deakin University. In parallel, a similar study of younger people  
42 (aged 12 to  $<25$  years) with type 1 diabetes is being undertaken in Australia; the hybrid  
43 closed-loop system and primary outcome are aligned for the two studies.  
44  
45  
46  
47  
48  
49

### 50 51 **Study outcomes**

52 The study outcomes are listed in Table 1.  
53  
54  
55  
56  
57  
58  
59  
60

**Table 1: Study outcomes****Primary outcome**

The proportion of time sensor glucose is in target range (3.9–10.0 mmol/L) with hybrid closed-loop versus standard therapy (MDI or IPT without RT-CGM), measured by masked CGM at 23–26 weeks post-randomisation.

**Secondary outcomes**

Hybrid closed-loop therapy versus standard therapy (overall and for each of baseline MDI and IPT separately) for the measures listed below.

1. Glucose control:
  - a. Masked CGM metrics for 24 h/day, day [06:00–00:00] and night [00:00–06:00] (measured at mid-study, end-of-study, and mid-study plus end-of-study combined):
    - i. Proportion of time spent 3.9–10.0 mmol/L (excluding the primary outcome)
    - ii. Proportion of time spent <2.8 mmol/L
    - iii. Proportion of time spent <3.3 mmol/L
    - iv. Proportion of time spent <3.9 mmol/L
    - v. Proportion of time spent 3.9–7.8 mmol/L
    - vi. Proportion of time spent >10.0 mmol/L
    - vii. Proportion of time spent >13.9 mmol/L
    - viii. Proportion of time spent >16.7 mmol/L
    - ix. SD and coefficient of variation
    - x. Mean glucose
  - b. Fasting capillary blood glucose
  - c. HbA<sub>1c</sub>
  - d. 1,5-anhydroglucitol
  - e. Symptomatic hypoglycaemia (with blood glucose <3.5 mmol/L) requiring carbohydrate rescue (*n*)
2. Clinical:
  - a. Change in total daily dose of insulin, and basal/bolus proportions
  - b. Change in insulin-to-carbohydrate ratio
  - c. Change in body weight
3. Psychosocial, sleep and cognitive functioning:
  - a. Treatment satisfaction: The Diabetes Treatment Satisfaction Questionnaire (DTSQ) status and change versions
  - b. Satisfaction with technology: Diabetes Management Experiences Questionnaire (DME-Q)
  - c. Fear of hypoglycaemia: Hypoglycaemia Fear Survey short form (HFS-SF)
  - d. Fear of hyperglycaemia: Hyperglycaemia Avoidance Scale (HAS)
  - e. Hypoglycaemia Awareness: Gold Score
  - f. Diabetes distress: Problem Areas in Diabetes (PAID)
  - g. Diabetes-specific quality of life: DAWN Impact of Diabetes profile (DIDP)
  - h. Diabetes-specific positive well-being: Well-being Questionnaire (W-BQ28) Positive Diabetes Well-being Subscale
  - i. Cognitive function: Prospective and Retrospective Memory Questionnaire (PRMQ) and Psychomotor Vigilance Task (PVT-192)
  - j. Driving: proportion of time-in-target glucose range while driving (Melbourne sites only)
  - k. Sleep quality: Actigraph data, Pittsburgh Sleep Quality Index, Karolinska Sleepiness Scale

4. Electrocardiograph profile (via Holter monitor)
  - a. Corrected QT interval (QT<sub>c</sub>)
  - b. Heart rate
  - c. Cardiac arrhythmias
5. Human-technology interaction (participants using hybrid closed-loop system):
  - a. Participant perceptions of the hybrid closed-loop system assessed via SMS data collection
  - b. Participant expectations and experiences with the hybrid closed-loop system assessed via longitudinal semi-structured interviews (Melbourne sites only)
6. Health economic:
  - a. Quality-adjusted life years calculated from the EQ-5D-5L
  - b. Hypoglycaemic events and HbA<sub>1c</sub>
  - c. Participant and family reporting on work interruption
  - d. Reported time spent on training, education and support, by the type of health professional resource used
  - e. Diabetes management consumables (glucose strips, ketone strips, batteries, sensors, site dressings, lancets, needles, insulin)
  - f. Resource utilisation tracked via linked administrative data from the Australian Medicare Benefits Schedule and Pharmaceutical Benefits Scheme
7. Biochemical markers of vascular disease risk:
  - a. Cell adhesion molecules
  - b. Oxidised low-density lipoprotein
  - c. Myeloperoxidase
  - d. MicroRNA signatures for arterial, renal and retinal complications
  - e. Telomerase
  - f. DNA methylation/acetylation
  - g. Isoprostanes (blood and urine) and proteomics
  - h. Clotting profile
8. Hybrid closed-loop system performance parameters:
  - a. Proportion of time closed-loop active
  - b. Unplanned exits from closed-loop (*n*)
  - c. Sensor performance versus blood glucose meter as measured by MARD and sensor failures (*n*)
  - d. Reported insulin delivery line failures (*n*)
  - e. Participant calls to the technical help line (*n*)
9. Safety:
  - a. Hospitalisations for diabetic ketoacidosis (*n*)
  - b. Severe hypoglycaemia, defined as hypoglycaemia requiring the assistance of another person to actively administer carbohydrate, glucagon, or take other corrective actions (*n*)

The primary study outcome is the proportion of sensor glucose time-in-target range (3.9–10.0 mmol/L) with hybrid closed-loop versus standard therapy, measured by masked CGM 23–26 weeks post-randomisation. This primary end-point was selected to provide the best indication of individual participants' glucose control. The 3.9–10.0 mmol/L glucose range is aligned

1  
2  
3 with outcome metrics proposed by the JDRF Artificial Pancreas Project Consortium, is  
4 consistent with available data relating glucose control and complication prevention, and  
5 represents a realistic glucose target.<sup>25 30</sup>  
6  
7

8 CGM study outcome data will be collected by identical methods for participants in both  
9 groups. Hence, participants assigned hybrid closed-loop therapy will wear two identical  
10 glucose sensors for 2 weeks mid-study and 3 weeks at end-of-study—one sensor providing  
11 RT-CGM information to the user and directly linking to the hybrid closed-loop system, and a  
12 second sensor collecting masked CGM study outcome data. The closed-loop system  
13 performance parameters chosen as study outcome measures are based upon an international  
14 consensus report for outcomes measures in closed-loop trials.<sup>30</sup>  
15  
16  
17  
18

19 For closed-loop technology to achieve long-term clinical benefits, then in addition to  
20 positively impacting biomedical outcomes, user acceptance, uptake and adaptations are  
21 required.<sup>31 32</sup> Therefore, this study will assess aspects of psychosocial well-being via both  
22 subjective (questionnaires, interviews) and objective (actigraph, psychomotor task) methods.  
23 This holistic approach will progress understanding of the human factors involved, thereby  
24 enabling adaption of the technology in line with the person's expectations and experiences.<sup>33</sup>  
25 The study will also assess whether CGM has an impact on utilisation of health services and  
26 medications.  
27  
28  
29  
30  
31  
32

### 33 **Eligibility**

34 Inclusion and exclusion criteria for participation are listed in Table 2.  
35  
36  
37  
38  
39  
40  
41  
42  
43  
44  
45  
46  
47  
48  
49  
50  
51  
52  
53  
54  
55  
56  
57  
58  
59  
60

**Table 2: Eligibility*****Inclusion criteria***

- Type 1 diabetes (as defined by the American Diabetes Association)<sup>34</sup> for at least 1 year
- Insulin regimen consisting of either:
  - MDI with  $\geq 4$  injections per day (including  $\geq 3$  rapid-acting insulin injections and  $\geq 1$  long-acting insulin injection); or
  - IPT established for  $\geq 3$  months
- Age 25–70 years inclusive
- HbA1c  $\leq 10.5\%$  ( $\leq 91$  mmol/mol)
- Living in an area with internet and cellular phone coverage
- English speaking proficiency

***Exclusion criteria***

- Chronic kidney disease (eGFR  $< 45$  mL/min/1.73m<sup>2</sup>)
- Current use of RT-CGM (defined as use  $> 25\%$  of the time during the past 3 months)
- Use of any non-insulin glucose-lowering agent within the past 3 months
- Oral or injected steroid use within the past 3 months
- Pregnancy, or pregnancy planned within study period
- Untreated coeliac disease or other malabsorption
- Uncontrolled thyroid disease
- Clinically-significant gastroparesis
- Uncontrolled hypertension (blood pressure: diastolic  $> 100$  or systolic  $> 160$  mmHg)
- History of myocardial infarction, severe uncontrolled heart failure, unstable angina, transient ischaemic attack, stroke, or thromboembolic disease in the past 3 months
- Poor visual acuity precluding use of the study technology
- Inability or unwillingness to meet protocol requirements
- Any severe or unstable medical or psychological condition which, in the opinion of the investigator, would compromise the ability to meet protocol requirements

The minimum inclusion age of 25 years was chosen to reflect a general adult population with type 1 diabetes while avoiding potential confounders associated with adolescence and emerging adulthood. This decision was informed by results of previous type 1 diabetes CGM and closed-loop studies, where individuals aged  $< 25$  years differed from those aged  $\geq 25$  years.<sup>14 35</sup>

1  
2  
3 Use of RT-CGM >25% of the time precludes inclusion. This decision was informed by study  
4 findings that adults aged  $\geq 25$  years with type 1 diabetes using RT-CGM with warning alarms  
5 had improved glucose control without increase in biochemical hypoglycaemia only when RT-  
6 CGM was worn  $\geq 5$ –6 days/week.<sup>35-37</sup> When CGM is used less often or without warning  
7 alarms, evidence suggests no glucose control benefit.  
8  
9

## 10 11 **Study diabetes management devices**

### 12 Hybrid closed-loop system

13  
14 The study hybrid closed-loop is the MiniMed™ 670G system, comprising a glucose sensor  
15 and transmitter coupled with an insulin pump containing a closed-loop algorithm (Medtronic,  
16 Northridge, CA, USA), and rapid-acting analogue insulin (either insulin aspart or insulin  
17 lispro) delivered subcutaneously. CGM data are transmitted to the pump every 5 minutes and  
18 the algorithm calculates the basal insulin dose (delivered at 5 min intervals) required to  
19 maintain the target glucose level. The algorithm uses a modified proportional integrative  
20 derivative model with insulin feedback based on an insulin delivery algorithm originally  
21 developed by Steil et al.<sup>38</sup> The algorithm also incorporates a supervisory model predictive  
22 component aiming to avoid insulin over-delivery.<sup>39</sup> For meals, the user estimates the amount  
23 of carbohydrate to be consumed (entering this into the pump) and checks their capillary blood  
24 glucose level. Using this information, an insulin bolus is calculated and delivered according  
25 to the individualised insulin-to-carbohydrate ratio and an insulin sensitivity factor determined  
26 by the algorithm (should a correction bolus be required).  
27  
28

29  
30 The MiniMed™ 670G system has been deemed safe and effective for glucose control in a 3-  
31 month uncontrolled study<sup>40 41</sup> and an exercise study.<sup>16</sup> The system was approved for use by  
32 the US Food and Drug Administration in 2016.  
33  
34

### 35 Masked CGM

36  
37 CGM data masked to both the participants and research team will be collected for study  
38 outcome measurements at three time-points: baseline pre-randomisation (3 weeks), mid-study  
39 (2 weeks) and end-of-study (3 weeks). For participants randomised to hybrid closed-loop, this  
40 masked CGM data collection will be in addition to the system's RT-CGM. The study uses  
41 Guardian™ Sensor 3 glucose sensors (Medtronic, Northridge, CA, USA). This sensor  
42 configuration has reported performance parameters of mean absolute relative difference  
43 (MARD)  $\pm$  standard deviation (SD) of  $9.6\% \pm 9.0\%$  and mean functional sensor life of  $146 \pm$   
44 39 h when used with a Medtronic MiniMed™ 640G insulin pump.<sup>42</sup> By using a separate  
45  
46  
47  
48  
49  
50  
51  
52  
53  
54  
55  
56  
57  
58  
59  
60

1  
2  
3 device to collect CGM study outcome data, the device under investigation is not also being  
4 used to evaluate its own performance.  
5

6 For masked CGM data collection, the glucose sensor will be inserted and the sensor recorder  
7 will be connected by the study team. During masked CGM, participants will be required to  
8 test capillary blood glucose levels at least 4 times per day with a CONTOUR<sup>®</sup> NEXT LINK  
9 meter (details below). Masked CGM data are collected retrospectively by uploading the  
10 recorder and the meter.  
11  
12  
13  
14

#### 15 Blood glucose monitoring

16 All participants will be provided with a CONTOUR<sup>®</sup> NEXT LINK 2.4 blood glucose meter  
17 (Ascensia, Parsippany, NJ, USA) which is able to transmit data directly to the MiniMed<sup>™</sup>  
18 670G insulin pump. Pre-randomisation and for participants randomised to standard therapy,  
19 the CONTOUR<sup>®</sup> NEXT LINK 2.4 will be used in addition to their regular glucose meter  
20 during masked CGM. Use of the same glucose meter within the hybrid closed-loop system  
21 and for masked CGM calibration will standardise data collection.  
22  
23  
24  
25

26 Participants using MDI at enrolment will also be provided with an ACCU-CHEK<sup>®</sup> Aviva  
27 Expert blood glucose meter (Roche Diagnostics, Mannheim, Germany), selected for its in-  
28 built 'bolus calculator'. The bolus calculator uses the measured blood glucose level,  
29 calculated rapid-acting 'insulin on board', and the programmed insulin sensitivity factor and  
30 insulin-to-carbohydrate ratio to determine the recommended insulin bolus doses. The use of a  
31 meter with bolus calculator by those in the control group who continue with MDI will reflect  
32 the bolus calculators used by participants randomised to hybrid closed-loop therapy and by  
33 those using IPT randomised to standard diabetes therapy.  
34  
35  
36  
37  
38  
39

#### 40 Diabetes management software

41 CareLink<sup>™</sup>, an internet-based platform from Medtronic, will be used for uploading insulin  
42 pump, glucose sensor and glucose meter data. The hybrid closed-loop system data are  
43 uploaded to a computer via the system's glucose meter USB connection; insulin pump, sensor  
44 and meter data are then accessible to study investigators.  
45  
46  
47  
48

#### 49 **Study design**

50 This is a prospective, open-label, parallel design randomised controlled study involving 120  
51 adults with type 1 diabetes ( $n=60$  using MDI,  $n=60$  using IPT). Study procedures will be  
52 undertaken by medical doctors with sub-speciality training in endocrinology, diabetes nurse  
53 educators, dieticians and research nurses. Throughout the study, the time taken for participant  
54  
55  
56  
57  
58  
59  
60



1  
2  
3 education, training, clinical care and technical support will be recorded; the health  
4 professional time will be used in health economic analyses to determine implications for  
5 closed-loop becoming a mainstream therapy. Adherence to study protocols will be assessed at  
6 each study visit; verbal and written reminders of study instructions will be provided to  
7 improve protocol adherence. Participants will continue their usual diabetes clinical care with  
8 their treating clinicians during study participation. Participants will be randomised 1:1 either  
9 to hybrid closed-loop therapy or to continue using their current standard diabetes therapy  
10 (either MDI or IPT) for 26 weeks (Fig. 1). Use of RT-CGM will not be permitted during run-  
11 in or by participants randomised to standard diabetes therapy (though CGM without live  
12 alerts, e.g. Abbott FreeStyle<sup>®</sup> Libre, is permissible).  
13  
14  
15  
16  
17  
18

### 19 **Sample size**

20  
21 The power calculation is for a parallel study design with two groups of equal size. It is based  
22 on SDs of the percentage time-in-target glucose range at 6 months (adjusted for baseline)  
23 observed for the subset of participants in two randomised clinical trials from the JDRF Study  
24 Group who had similar characteristics to participants being recruited here (Professor Roy  
25 Beck, personal communication). The SD (95% confidence interval) for pump users was 9%  
26 (8%, 12%) and for MDI users was 10% (7%, 19%).  
27  
28  
29  
30

31 From an initial overall sample size of  $n=120$ , with a dropout rate of 10%, a common SD of  
32 9% and a type I error rate of 5%, the power to detect a minimum absolute difference of 5%  
33 time-in-target glucose range would be 80%. A more conservative scenario with a dropout rate  
34 of 20%, and unequal SDs of 12% and 19% for pump and MDI users, respectively, increases  
35 the minimum detectable absolute difference to 9% with power of 80%.  
36  
37  
38  
39

### 40 **Study schedule**

41  
42 The study will consist of 16 visits including the run-in and intervention periods. Key  
43 activities undertaken during each visit are shown in Table 3. Participants will be provided  
44 with 24-hour telephone contacts for support if required. Health professionals will log all time  
45 taken training and communicating with the study participants.  
46  
47  
48  
49  
50  
51  
52  
53  
54  
55  
56  
57  
58  
59  
60

**Table 3: Study visits**

| Study Visit                                        | 1 | 2 | 3  | 4  | 5  | 6 | 7 | 8  | 9  | 10 | 11 | 12 | 13 | 14 | 15 | 16 | 17 |
|----------------------------------------------------|---|---|----|----|----|---|---|----|----|----|----|----|----|----|----|----|----|
| Weeks from randomisation                           |   |   | -3 | -2 | -1 | 0 | 1 | ~7 | 11 | 12 | 13 | 23 | 24 | 25 | 26 | 26 | 39 |
| Clinical assessment                                | X |   |    |    |    | X |   |    |    |    | X  |    |    |    |    | X  |    |
| Time with health professional                      |   | X | X  | X  | X  | X | X | X  | X  | X  | X  | X  | X  | X  | X  | X  |    |
| HbA <sub>1c</sub>                                  | X |   |    |    |    | X |   |    |    |    | X  |    |    |    |    | X  |    |
| β-hCG, C-peptide                                   | X |   |    |    |    |   |   |    |    |    |    |    |    |    |    |    |    |
| CHO-counting education                             |   | X |    |    |    |   |   |    |    |    | X  |    |    |    |    |    |    |
| Insulin pump training                              |   |   |    |    |    |   | X |    |    |    |    |    |    |    |    |    |    |
| Insulin dose review                                |   | X |    |    |    |   |   | X  |    |    | X  |    |    |    |    | X  |    |
| Logbook provision                                  |   |   | X  |    |    |   |   |    |    |    |    |    |    |    |    |    |    |
| Logbook data collection                            |   |   |    | X  | X  | X | X | X  | X  | X  | X  | X  | X  | X  | X  | X  |    |
| Masked CGM insertion                               |   |   | X  | X  | X  |   |   |    | X  | X  |    | X  | X  | X  |    |    |    |
| Glucose meter upload                               |   |   |    | X  | X  | X | X | X  | X  | X  | X  | X  | X  | X  | X  | X  |    |
| Psychosocial, sleep, cognitive functioning surveys | X |   |    |    |    |   |   |    |    |    | X  |    |    |    |    | X  |    |
| Cognitive performance device provision             |   |   | X  |    |    |   |   |    | X  |    |    | X  |    |    |    |    |    |
| Actigraphy & sleep diary provision                 |   |   | X  | X  | X  |   |   |    | X  | X  |    | X  | X  | X  |    |    |    |
| Semi-structured interviews                         |   |   |    |    |    |   | X |    | X  |    |    |    |    |    |    | X  | X  |
| Driving device and diary provision                 |   |   | X  | X  | X  |   |   |    | X  | X  |    | X  | X  | X  |    |    |    |
| Holter monitor provision                           |   |   | X  |    |    |   |   |    | X  |    |    | X  |    |    |    |    |    |
| Vascular disease risk markers                      |   |   |    |    |    | X |   |    |    |    |    |    |    |    |    | X  |    |

### Run-in period

After enrolment, there will be a run-in period lasting at least 5 weeks. Participants will undergo initial medical, psychosocial and cognitive assessments. Their diabetes-related knowledge and carbohydrate-counting proficiency will be assessed and their insulin dosing

1  
2  
3 will be optimised. Participants will be provided with detailed training and support to use the  
4 study glucose meters and masked CGM devices. Education will be provided by diabetes  
5 nurse educators and dietitians to optimise participants' diabetes self-management including  
6 carbohydrate-counting. The optimisation of carbohydrate-counting is central to baseline  
7 optimisation for all participants in the study—this aims to achieve the best possible match of  
8 bolus insulin doses to the individuals' requirements for the carbohydrate consumed for both  
9 groups, thereby testing the closed-loop aspect of the hybrid closed-loop system's insulin  
10 delivery in comparison with standard therapy.  
11  
12  
13  
14  
15

16 After provision of education, data will be collected for 3 weeks of baseline masked CGM,  
17 actigraphy (sleep data) and from the self-reported diabetes logbook. Driving log data (to  
18 associate with the CGM data) will also be collected during these 3 weeks for participants at  
19 the three clinical sites in Melbourne. At the end of the run-in period, the CGM data will be  
20 uploaded and checked to ensure data are available for at least 70% of the time.<sup>35</sup> If the  
21 minimum required CGM data are not available, an additional week of CGM will be  
22 undertaken to fulfil the protocol requirements. At the end of the run-in, baseline blood and  
23 urine samples will be collected for measurement of HbA<sub>1c</sub> and biochemical markers of  
24 vascular disease risk.  
25  
26  
27  
28  
29  
30

### 31 Randomisation

32 Eligible participants will be randomised after completing the run-in. Group allocation will be  
33 a 1:1 ratio using minimisation with three variables, all of which are expected to be highly  
34 prognostic of the primary outcome. These minimisation variables are: i) the proportion of  
35 time-in-target glucose range at baseline (dichotomised to  $\leq 50\%$  and  $> 50\%$ ); ii) study centre  
36 (seven clinical sites); and iii) insulin delivery modality (MDI or IPT). Randomisation will be  
37 performed by an independent group of statisticians using central randomisation software, and  
38 will be implemented into an electronic participant record system.  
39  
40  
41  
42  
43  
44

45 The nature of the study groups does not allow blinding of participants or investigators.

### 46 Intervention period

47 After randomisation, there will be a 26-week intervention period.

48 Participants randomised to standard therapy will continue using their current insulin delivery  
49 modality (MDI or IPT) and will be instructed to refrain from using RT-CGM during the  
50 study.  
51  
52  
53  
54  
55  
56  
57  
58  
59  
60

1  
2  
3 Participants randomised to hybrid closed-loop therapy will receive general insulin pump and  
4 CGM education and training, plus instruction regarding usage of the study hybrid closed-loop  
5 system. This education and training period may take up to 4 weeks (likely longer for those  
6 using MDI than IPT at baseline). The hybrid closed-loop system will be programmed with  
7 participants' usual insulin-to-carbohydrate ratios and insulin sensitivity factors, as well as  
8 their usual basal rates (or the basal rates determined by their clinicians for those participants  
9 transitioning from MDI). Participants will be provided with a 24-hour technical help  
10 telephone contact for the hybrid closed-loop system.  
11  
12  
13  
14  
15

16 Participants at the three clinical sites in Melbourne who are randomised to hybrid closed-loop  
17 therapy will undergo four semi-structured interviews to assess their expectations of, and  
18 experiences with, the technology. These interviews will be conducted at randomisation, then  
19 at 11 weeks, 26 weeks and 39 weeks post-randomisation.  
20  
21  
22

23 Participants will have mid-study data collected between 11 weeks to 13 weeks post-  
24 randomisation. Two weeks of masked CGM data, cognitive assessments and actigraphy will  
25 be collected, plus driving data for participants at the Melbourne sites. Clinical review with  
26 assessment of diabetes management and carbohydrate-counting, and adjustment of therapy  
27 and further education as required, will be undertaken 13 weeks post-randomisation. At this  
28 visit, psychosocial questionnaires will be completed and venous samples for HbA<sub>1c</sub> will be  
29 collected.  
30  
31  
32  
33  
34

35 Participants will have end-of-study data collected between 23 to 26 weeks post-  
36 randomisation. Three weeks of masked CGM data, cognitive assessments and actigraphy will  
37 be collected, plus driving data for participants at the Melbourne sites. At the end of the three-  
38 week period, the CGM data will be uploaded and checked for available data at least 70% of  
39 the time. If 70% of CGM data are not available, an additional week of CGM data will be  
40 collected. At the end-of-study visit (26 weeks post-randomisation), psychosocial  
41 questionnaires will be completed, and venous and urine samples will be collected for HbA<sub>1c</sub>  
42 and biochemical markers of vascular disease risk. Participants in the hybrid closed-loop  
43 group will change back to using their usual insulin delivery modality (MDI or IPT). Doctor  
44 visit data from the Medicare Benefits Schedule and insulin prescription data from the  
45 Pharmaceutical Benefits Scheme will be accessed for study participants.  
46  
47  
48  
49  
50  
51  
52  
53  
54  
55  
56  
57  
58  
59  
60

### Statistical methods

The primary analysis will assess differences in the proportion of time-in-target glucose sensor range (3.9–10.0 mmol/L) with hybrid closed-loop versus standard therapy, measured by masked CGM at 23–26 weeks post-randomisation on an intention-to-treat basis using analysis of covariance (ANCOVA) with adjustment for baseline time-in-target range. A *p*-value threshold of <0.05 will be used to determine statistical significance.

Model fit will be evaluated by exploration of residuals. If the model is of poor fit, the outcome variable will be transformed and the model refitted and evaluated. If unsuccessful, nonparametric analysis will be performed.

Analysis of continuous secondary outcomes will also use ANCOVA with adjustment for baseline time-in-target range, whereas Poisson or negative binomial regression will be used for count outcomes and logistic regression will be used for binary outcomes. Subgroup analysis by baseline insulin delivery modality will be performed by inclusion of an interaction term in the regression modelling or by a stratified analysis when non-parametric methods are used.

No adjustment for multiplicity is planned. All results for primary and secondary outcomes will be reported.<sup>43</sup> No interim analysis is planned.

### Health economic evaluation

An economic evaluation will determine the incremental cost of home-based hybrid closed-loop versus standard diabetes therapy in Australia. This analysis will quantify costs directly associated with hybrid closed-loop and standard diabetes therapy plus other impacts on the health system (Table 1). Outcomes will be assessed in quality-adjusted life years for changes in health-related quality of life, and for the likely long-term impact of changes in glucose control on long-term outcomes using a type 1 diabetes simulation model.

### Safety assessments

Safety parameters to be assessed include severe hypoglycaemia, ketoacidosis, and unplanned hospitalisations directly related to the study (Table 1).

### Efficacy assessments

Efficacy parameters to be assessed include glucose control, clinical measures, psychosocial and cognitive functioning, human-technology interaction, health economic measures and biochemical markers of vascular disease risk (Table 1).

### **Closed-loop system performance parameters**

Closed-loop system performance parameters to be assessed relate to the system overall, to individual system components and to system usability (Table 1).

### **Trial oversight**

The study will be conducted in accordance with the principles of the Declaration of Helsinki and guidelines for Good Clinical Practice (GCP).

The day-to-day study management will be the responsibility of the investigators at each clinical site. The Principal Investigator and study project manager will maintain regular correspondence with all investigators and study coordinators. The Principal Investigator, with the sites' lead investigators, will assume responsibility for the progress of the study in accordance with agreed timelines and milestones with the study funders. A combined data safety and monitoring board (DSMB) will be established for this study and the aligned study, independent from the study investigators, comprising adult and paediatric physicians experienced in statistics and clinical trials. The study project manager will liaise with the study teams in all centres to establish procedures and ensure that the study is carried out according to the protocol and to standards of GCP, with robust systems for reporting adverse events. The study project manager will be responsible for the central preparations of data for presentation to the DSMB.

### **ETHICS AND DISSEMINATION**

The study has received ethics approval from the lead site Human Research Ethics Committee. Other clinical sites provide oversight through local governance committees. Any substantial amendments to the study protocol will be reported to the lead site ethics committee for approval prior to implementation, and updated on the trial registry, with the study investigators being advised in writing.

All potential participants will be provided with written and verbal information regarding the study, the procedures involved and all potential risks related to participating. A study investigator will obtain written informed consent from each participant prior to commencing study procedures. All personal information about potential and enrolled participants will be de-identified to protect confidentiality before, during and after the trial. Standard operating procedures for reporting all adverse events, device-related adverse events and severe adverse events will be in place. The Human Research Ethics Committees and the Therapeutic Goods

Administration of Australia will be informed of any serious adverse events and any unexpected device-related adverse events.

Screening and recruitment commenced in May 2017. It is anticipated that the study visits will be completed by May 2019. The results of the study will be disseminated at national and international conferences and by peer-reviewed publications.

### **Acknowledgments**

We thank Professor Roman Hovorka and Professor Roy Beck for their expert advice regarding study design.

### **Contributors**

SAM, MIDB, PGC, AJJ, ACK, JS, GMW, TWJ and DNO designed the study. SAM and DNO drafted the manuscript. All authors contributed to the writing and/or critical review of the study protocol and reviewed this manuscript for intellectual content. DNO is the principal investigator and guarantor.

The Australian JDRF Closed-Loop Research Group members have had input into the protocol, and are named as follows: Mary B Abraham, Geoffrey R Ambler, Leon A Bach, Morton G Burt, Fergus J Cameron, Philip M Clarke, Neale D Cohen, Peter G Colman, Elizabeth A Davis, Martin I de Bock, Jan M Fairchild, Elizabeth A Geelhoed, Christel Hendrieckx, D Jane Holmes-Walker, Jodie C Horsburgh, Alicia J Jenkins, Timothy W Jones, Joey Kaye, Anthony C Keech, Bruce R King, Kavita Kumareswaran, Melissa H Lee, Richard J MacIsaac, Sybil A McAuley, Roland W McCallum, Jennifer A Nicholas, David N O'Neal, Barbora Paldus, Catriona Sims, Grant J Smith, Jane Speight, Stephen N Stranks, Vijaya Sundararajan, Steven Trawley, Sara Vogrin and Glenn M Ward.

### **Funding**

This study is funded by the Australian Research Council (with the funding administered by JDRF Australia), and by the National Health and Medical Research Council of Australia. Material support is being provided via a grant from the Medtronic External Research Program. SAM is supported by a JDRF Early-Career Patient-Orientated Diabetes Research Award. MIDB was supported by a Raine Clinical Research Fellowship. AJJ is supported by an NHMRC Practitioner Fellowship. JS is supported by core funding to the Australian Centre for Behavioural Research in Diabetes provided by Diabetes Victoria and Deakin University.

The study funders and sponsor did not have any role in study design or contribution to this manuscript, and they will not be involved in collection, management, analysis or interpretation of the data. The study funders will not have any role in writing the study report or the decision to submit the report for publication.

### Competing interests

MIDB and NDC report receiving speaker honoraria from Medtronic. DJH reports receiving speaker and advisory board honoraria from Medtronic. RWM reports receiving conference travel and accommodation support from Medtronic. JS reports that the ACBRD has received honoraria from Medtronic in relation to her speaking engagements and role in advisory boards. DNO reports receiving speaker honoraria and research grants from Medtronic.

### Ethics approval

St Vincent's Hospital Melbourne Human Research Ethics Committee (lead site, approval number HREC-D 088/16).

### REFERENCES

1. DCCT Research Group. The effect of intensive treatment of diabetes on the development and progression of long-term complications in insulin-dependent diabetes mellitus. *N Engl J Med* 1993;329(14):977-86. [published Online First: 1993/09/30]
2. Nathan DM, Cleary PA, Backlund JY, et al. Intensive diabetes treatment and cardiovascular disease in patients with type 1 diabetes. *N Engl J Med* 2005;353(25):2643-53. doi: 10.1056/NEJMoa052187
3. Nathan DM, DCCT/EDIC Research Group. The diabetes control and complications trial/epidemiology of diabetes interventions and complications study at 30 years: overview. *Diabetes Care* 2014;37(1):9-16. doi: 10.2337/dc13-2112
4. Rubin RR, Peyrot M. Quality of life and diabetes. *Diabetes Metab Res Rev* 1999;15(3):205-18.
5. American Diabetes Association. *Pharmacologic approaches to glycemic treatment. Sec. 8. In Standards of Medical Care in Diabetes—2017. Diabetes Care* 2017;40(Suppl 1):S64-S74. doi: 10.2337/dc17-S011
6. Beck RW, Tamborlane WV, Bergenstal RM, et al. The T1D Exchange clinic registry. *J Clin Endocrinol Metab* 2012;97(12):4383-9. doi: 10.1210/jc.2012-1561
7. McKnight JA, Wild SH, Lamb MJ, et al. Glycaemic control of Type 1 diabetes in clinical practice early in the 21st century: an international comparison. *Diabet Med* 2015;32(8):1036-50. doi: 10.1111/dme.12676
8. Huo L, Harding JL, Peeters A, et al. Life expectancy of type 1 diabetic patients during 1997-2010: a national Australian registry-based cohort study. *Diabetologia* 2016;59(6):1177-85. doi: 10.1007/s00125-015-3857-4
9. Huo L, Shaw JE, Wong E, et al. Burden of diabetes in Australia: life expectancy and disability-free life expectancy in adults with diabetes. *Diabetologia* 2016;59(7):1437-45. doi: 10.1007/s00125-016-3948-x
10. Thabit H, Hovorka R. Coming of age: the artificial pancreas for type 1 diabetes. *Diabetologia* 2016;59(9):1795-805. doi: 10.1007/s00125-016-4022-4
11. Leelarathna L, Dellweg S, Mader JK, et al. Day and night home closed-loop insulin delivery in adults with type 1 diabetes: three-center randomized crossover study. *Diabetes Care* 2014;37(7):1931-7. doi: 10.2337/dc13-2911



12. Nimri R, Muller I, Atlas E, et al. MD-Logic overnight control for 6 weeks of home use in patients with type 1 diabetes: randomized crossover trial. *Diabetes Care* 2014;37(11):3025-32. doi: 10.2337/dc14-0835
13. Thabit H, Tauschmann M, Allen JM, et al. Home Use of an Artificial Beta Cell in Type 1 Diabetes. *N Engl J Med* 2015;373(22):2129-40. doi: 10.1056/NEJMoa1509351
14. Sharifi A, De Bock MI, Jayawardene D, et al. Glycemia, Treatment Satisfaction, Cognition, and Sleep Quality in Adults and Adolescents with Type 1 Diabetes When Using a Closed-Loop System Overnight Versus Sensor-Augmented Pump with Low-Glucose Suspend Function: A Randomized Crossover Study. *Diabetes Technol Ther* 2016;18(12):772-83. doi: 10.1089/dia.2016.0288
15. Weisman A, Bai JW, Cardinez M, et al. Effect of artificial pancreas systems on glycaemic control in patients with type 1 diabetes: a systematic review and meta-analysis of outpatient randomised controlled trials. *Lancet Diabetes Endocrinol* 2017 doi: 10.1016/S2213-8587(17)30167-5
16. Jayawardene DC, McAuley SA, Horsburgh JC, et al. Closed-Loop Insulin Delivery for Adults with Type 1 Diabetes Undertaking High-Intensity Interval Exercise Versus Moderate-Intensity Exercise: A Randomized, Crossover Study. *Diabetes Technol Ther* 2017;19(6):340-48. doi: 10.1089/dia.2016.0461
17. Cox DJ, Kovatchev BP, Anderson SM, et al. Type 1 diabetic drivers with and without a history of recurrent hypoglycemia-related driving mishaps: physiological and performance differences during euglycemia and the induction of hypoglycemia. *Diabetes Care* 2010;33(11):2430-5. doi: 10.2337/dc09-2130
18. Chiang JL, Kirkman MS, Laffel LM, et al. Type 1 diabetes through the life span: a position statement of the American Diabetes Association. *Diabetes Care* 2014;37(7):2034-54. doi: 10.2337/dc14-1140
19. Hendrieckx C, Halliday JA, Bowden JP, et al. Severe hypoglycaemia and its association with psychological well-being in Australian adults with type 1 diabetes attending specialist tertiary clinics. *Diabetes Res Clin Pract* 2014;103(3):430-6. doi: 10.1016/j.diabres.2013.12.005
20. Goss J. Projection of Australian health care expenditure by disease, 2003 to 2033. Cat. no. HWE 43. Canberra: AIHW., 2008.
21. Colagiuri S, Brnabic A, Gomez M, et al. DiabCo\$ Australia Type 1: Assessing the burden of Type 1 Diabetes in Australia: Diabetes Australia, Canberra., 2009.
22. Tao B, Pietropaolo M, Atkinson M, et al. Estimating the cost of type 1 diabetes in the U.S.: a propensity score matching method. *PLoS One* 2010;5(7):e11501. doi: 10.1371/journal.pone.0011501
23. Barnard KD, Hood KK, Weissberg-Benchell J, et al. Psychosocial assessment of artificial pancreas (AP): commentary and review of existing measures and their applicability in AP research. *Diabetes Technol Ther* 2015;17(4):295-300. doi: 10.1089/dia.2014.0305
24. DCCT Research Group. The relationship of glycemic exposure (HbA1c) to the risk of development and progression of retinopathy in the diabetes control and complications trial. *Diabetes* 1995;44(8):968-83.
25. Beck RW, Connor CG, Mullen DM, et al. The Fallacy of Average: How Using HbA1c Alone to Assess Glycemic Control Can Be Misleading. *Diabetes Care* 2017;40(8):994-99. doi: 10.2337/dc17-0636
26. Steineck I, Cederholm J, Eliasson B, et al. Insulin pump therapy, multiple daily injections, and cardiovascular mortality in 18,168 people with type 1 diabetes: observational study. *BMJ* 2015;350:h3234. doi: 10.1136/bmj.h3234
27. Barnard KD, Venkat MV, Close K, et al. PsychDT Working Group: Report Psychosocial Aspects of Artificial Pancreas Systems. *J Diabetes Sci Technol* 2015;9(4):925-8. doi: 10.1177/1932296815588332
28. National Diabetes Services Scheme. Product and supply 2017 [Available from: <https://www.ndss.com.au/product-and-supply> accessed 22 June 2017.
29. National Diabetes Services Scheme. Continuous Glucose Monitoring 2017 [Available from: <https://www.ndss.com.au/cgm> accessed 22 June 2017.

30. Maahs DM, Buckingham BA, Castle JR, et al. Outcome Measures for Artificial Pancreas Clinical Trials: A Consensus Report. *Diabetes Care* 2016;39(7):1175-9. doi: 10.2337/dc15-2716
31. Gonder-Frederick LA, Shepard JA, Grabman JH, et al. Psychology, technology, and diabetes management. *Am Psychol* 2016;71(7):577-89. doi: 10.1037/a0040383
32. Hendrieckx C, Poole LA, Sharifi A, et al. "It Is Definitely a Game Changer": A Qualitative Study of Experiences with In-home Overnight Closed-Loop Technology Among Adults with Type 1 Diabetes. *Diabetes Technol Ther* 2017;19(7):410-16. doi: 10.1089/dia.2017.0007
33. Gonder-Frederick LA, Grabman JH, Shepard JA. Human Factor Considerations for Artificial Pancreas Research. *Diabetes Technol Ther* 2016;18(12):762-64. doi: 10.1089/dia.2016.0403
34. American Diabetes Association. Classification and Diagnosis of Diabetes Sec. 2. In Standards of Medical Care in Diabetes—2017. *Diabetes Care* 2017;40(Suppl 1):S11-S24. doi: 10.2337/dc17-S005
35. JDRF CGM Study Group. Continuous glucose monitoring and intensive treatment of type 1 diabetes. *N Engl J Med* 2008;359(14):1464-76. doi: 10.1056/NEJMoa0805017
36. JDRF CGM Study Group. The effect of continuous glucose monitoring in well-controlled type 1 diabetes. *Diabetes Care* 2009;32(8):1378-83. doi: 10.2337/dc09-0108
37. O'Connell MA, Donath S, O'Neal DN, et al. Glycaemic impact of patient-led use of sensor-guided pump therapy in type 1 diabetes: a randomised controlled trial. *Diabetologia* 2009;52(7):1250-7. doi: 10.1007/s00125-009-1365-0
38. Steil GM, Palerm CC, Kurtz N, et al. The effect of insulin feedback on closed loop glucose control. *J Clin Endocrinol Metab* 2011;96(5):1402-8. doi: 10.1210/jc.2010-2578
39. Grosman B, Ilany J, Roy A, et al. Hybrid Closed-Loop Insulin Delivery in Type 1 Diabetes During Supervised Outpatient Conditions. *J Diabetes Sci Technol* 2016;10(3):708-13. doi: 10.1177/1932296816631568
40. Bergenstal RM, Garg S, Weinzimer SA, et al. Safety of a Hybrid Closed-Loop Insulin Delivery System in Patients With Type 1 Diabetes. *JAMA* 2016;316(13):1407-08. doi: 10.1001/jama.2016.11708
41. Garg SK, Weinzimer SA, Tamborlane WV, et al. Glucose Outcomes with the In-Home Use of a Hybrid Closed-Loop Insulin Delivery System in Adolescents and Adults with Type 1 Diabetes. *Diabetes Technol Ther* 2017;19(3):155-63. doi: 10.1089/dia.2016.0421
42. Christiansen MP, Garg SK, Brazg R, et al. Accuracy of a Fourth-Generation Subcutaneous Continuous Glucose Sensor. *Diabetes Technol Ther* 2017;19(8):446-56. doi: 10.1089/dia.2017.0087
43. Schulz KF, Grimes DA. Multiplicity in randomised trials I: endpoints and treatments. *Lancet* 2005;365(9470):1591-5. doi: 10.1016/S0140-6736(05)66461-6

## FIGURE LEGEND

Figure 1: Study protocol overview

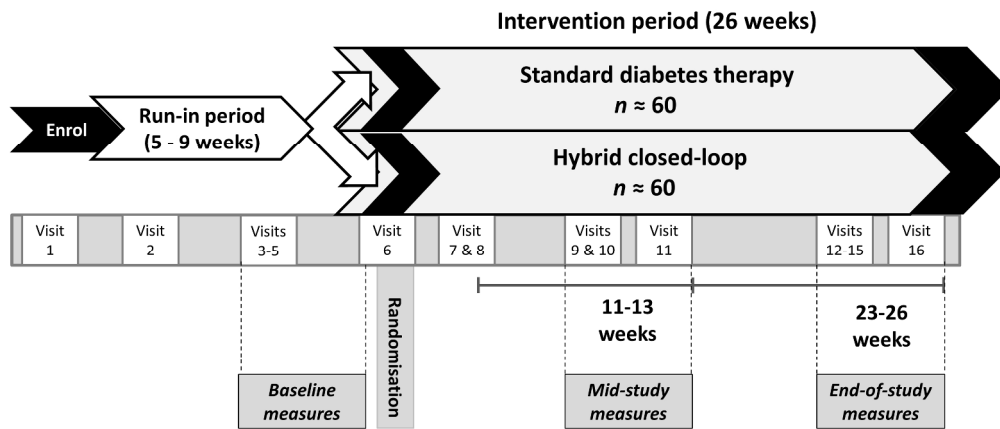

Figure 1: Study protocol overview

254x190mm (300 x 300 DPI)

# BMJ Open

## Efficacy of 6 months hybrid closed-loop insulin delivery on glucose control, psychosocial well-being, sleep and cognition in adults with type 1 diabetes: a randomised controlled trial protocol

|                                 |                                                                                                                                                                                                                                                                                                                                                                                                                                                                                                                                                                                                                                                                                                                                                                                                                                                                                                                                                                                                                                                                                                                                                                                                                                                                                                                                                                                                                                                                                                                                                                                                                                                                                                                                                                                                                                                                                                                                                                                                                                                                                                                                                                                                                                                                                     |
|---------------------------------|-------------------------------------------------------------------------------------------------------------------------------------------------------------------------------------------------------------------------------------------------------------------------------------------------------------------------------------------------------------------------------------------------------------------------------------------------------------------------------------------------------------------------------------------------------------------------------------------------------------------------------------------------------------------------------------------------------------------------------------------------------------------------------------------------------------------------------------------------------------------------------------------------------------------------------------------------------------------------------------------------------------------------------------------------------------------------------------------------------------------------------------------------------------------------------------------------------------------------------------------------------------------------------------------------------------------------------------------------------------------------------------------------------------------------------------------------------------------------------------------------------------------------------------------------------------------------------------------------------------------------------------------------------------------------------------------------------------------------------------------------------------------------------------------------------------------------------------------------------------------------------------------------------------------------------------------------------------------------------------------------------------------------------------------------------------------------------------------------------------------------------------------------------------------------------------------------------------------------------------------------------------------------------------|
| Journal:                        | <i>BMJ Open</i>                                                                                                                                                                                                                                                                                                                                                                                                                                                                                                                                                                                                                                                                                                                                                                                                                                                                                                                                                                                                                                                                                                                                                                                                                                                                                                                                                                                                                                                                                                                                                                                                                                                                                                                                                                                                                                                                                                                                                                                                                                                                                                                                                                                                                                                                     |
| Manuscript ID                   | bmjopen-2017-020274.R1                                                                                                                                                                                                                                                                                                                                                                                                                                                                                                                                                                                                                                                                                                                                                                                                                                                                                                                                                                                                                                                                                                                                                                                                                                                                                                                                                                                                                                                                                                                                                                                                                                                                                                                                                                                                                                                                                                                                                                                                                                                                                                                                                                                                                                                              |
| Article Type:                   | Protocol                                                                                                                                                                                                                                                                                                                                                                                                                                                                                                                                                                                                                                                                                                                                                                                                                                                                                                                                                                                                                                                                                                                                                                                                                                                                                                                                                                                                                                                                                                                                                                                                                                                                                                                                                                                                                                                                                                                                                                                                                                                                                                                                                                                                                                                                            |
| Date Submitted by the Author:   | 20-Mar-2018                                                                                                                                                                                                                                                                                                                                                                                                                                                                                                                                                                                                                                                                                                                                                                                                                                                                                                                                                                                                                                                                                                                                                                                                                                                                                                                                                                                                                                                                                                                                                                                                                                                                                                                                                                                                                                                                                                                                                                                                                                                                                                                                                                                                                                                                         |
| Complete List of Authors:       | <p>McAuley, Sybil; University of Melbourne, Department of Medicine; St Vincent's Hospital Melbourne, Department of Endocrinology and Diabetes<br/> de Bock, Martin; Princess Margaret Hospital for Children, Department of Endocrinology and Diabetes; University of Western Australia, Telethon Kids Institute</p> <p>Sundararajan, Vijaya; University of Melbourne, Department of Medicine<br/> Bach, Leon; Alfred Hospital, Department of Endocrinology and Diabetes; Monash University, Department of Medicine (Alfred)</p> <p>Burt, Morton; Flinders Medical Centre, Southern Adelaide Diabetes and Endocrine Services; Flinders University, School of Medicine<br/> Cohen, Neale; Baker Heart and Diabetes Institute</p> <p>Colman, Peter; Royal Melbourne Hospital, Department of Endocrinology and Diabetes</p> <p>Holmes-Walker, Deborah; Westmead Hospital, Department of Endocrinology and Diabetes; University of Sydney, Sydney Medical School</p> <p>Jenkins, Alicia; University of Melbourne, Department of Medicine; St Vincent's Hospital Melbourne, Department of Endocrinology and Diabetes</p> <p>Kaye, Joey; Sir Charles Gairdner Hospital, Department of Endocrinology and Diabetes</p> <p>Keech, Anthony; University of Sydney, NHMRC Clinical Trials Centre</p> <p>MacIsaac, Richard J.; University of Melbourne, Department of Medicine; St Vincent's Hospital Melbourne, Department of Endocrinology and Diabetes</p> <p>McCallum, Roland; Royal Hobart Hospital, Department of Endocrinology and Diabetes</p> <p>Speight, Jane; The Australian Centre for Behavioural Research in Diabetes; Deakin University, School of Psychology</p> <p>Stranks, Stephen; Flinders Medical Centre, Southern Adelaide Diabetes and Endocrine Services; Flinders University, School of Medicine</p> <p>Ward, Glenn; St Vincent's Hospital Melbourne, Department of Endocrinology and Diabetes; University of Melbourne, Department of Pathology</p> <p>Jones, Timothy; Princess Margaret Hospital for Children, Department of Endocrinology and Diabetes; University of Western Australia, Telethon Kids Institute</p> <p>O'Neal, David; University of Melbourne, Department of Medicine; St Vincent's Hospital Melbourne, Department of Endocrinology and Diabetes</p> |
| <b>Primary Subject Heading</b>: | Diabetes and endocrinology                                                                                                                                                                                                                                                                                                                                                                                                                                                                                                                                                                                                                                                                                                                                                                                                                                                                                                                                                                                                                                                                                                                                                                                                                                                                                                                                                                                                                                                                                                                                                                                                                                                                                                                                                                                                                                                                                                                                                                                                                                                                                                                                                                                                                                                          |

1  
2  
3  
4  
5  
6  
7  
8  
9  
10  
11  
12  
13  
14  
15  
16  
17  
18  
19  
20  
21  
22  
23  
24  
25  
26  
27  
28  
29  
30  
31  
32  
33  
34  
35  
36  
37  
38  
39  
40  
41  
42  
43  
44  
45  
46  
47  
48  
49  
50  
51  
52  
53  
54  
55  
56  
57  
58  
59  
60

|                            |                                                                                               |
|----------------------------|-----------------------------------------------------------------------------------------------|
| Secondary Subject Heading: | Medical management, Patient-centred medicine, Pharmacology and therapeutics, Research methods |
| Keywords:                  | Type 1 diabetes, Closed loop, Adults                                                          |
|                            |                                                                                               |

SCHOLARONE™  
Manuscripts

For peer review only

1  
2  
3  
4  
5  
6  
7  
8  
9  
10  
11  
12  
13  
14  
15  
16  
17  
18  
19  
20  
21

## **Efficacy of 6 months hybrid closed-loop insulin delivery on glucose control, psychosocial well-being, sleep and cognition in adults with type 1 diabetes: a randomised controlled trial protocol**

Sybil A McAuley<sup>1,2</sup>, Martin I de Bock<sup>3,4,5</sup>, Vijaya Sundararajan<sup>1</sup>, Melissa H Lee<sup>1,2</sup>, Barbora Paldus<sup>1</sup>, Geoffrey R Ambler<sup>21</sup>, Leon A Bach<sup>6,7</sup>, Morton G Burt<sup>8,9</sup>, Fergus J Cameron<sup>22,23</sup>, Philip M Clarke<sup>20</sup>, Neale D Cohen<sup>10</sup>, Peter G Colman<sup>11</sup>, Elizabeth A Davis<sup>3,4,5</sup>, Jan M Fairchild<sup>24</sup>, Christel Hendrieckx<sup>17,18</sup>, D Jane Holmes-Walker<sup>12,13</sup>, Jodie C Horsburgh<sup>2</sup>, Alicia J Jenkins<sup>1,2,14</sup>, Joey Kaye<sup>15</sup>, Anthony C Keech<sup>14</sup>, Bruce R King<sup>25</sup>, Kavita Kumareswaran<sup>6,10</sup>, Richard J MacIsaac<sup>1,2</sup>, Roland W McCallum<sup>16</sup>, Jennifer A Nicholas<sup>3,4</sup>, Catriona Sims<sup>1</sup>, Jane Speight<sup>17,18</sup>, Stephen N Stranks<sup>8,9</sup>, Steven Trawley<sup>26</sup>, Glenn M Ward<sup>2,19</sup>, Sara Vogrin<sup>1</sup>, Timothy W Jones<sup>3,4,5</sup>, David N O'Neal<sup>1,2</sup>

1. Department of Medicine, University of Melbourne, Melbourne, Australia
2. Department of Endocrinology and Diabetes, St Vincent's Hospital Melbourne, Melbourne, Australia
3. Department of Endocrinology and Diabetes, Princess Margaret Hospital for Children, Perth, Australia
4. Telethon Kids Institute, University of Western Australia, Perth, Australia
5. School of Paediatrics and Child Health, University of Western Australia, Perth, Australia
6. Department of Endocrinology and Diabetes, Alfred Hospital, Melbourne, Australia
7. Department of Medicine (Alfred), Monash University, Melbourne, Australia
8. Southern Adelaide Diabetes and Endocrine Services, Flinders Medical Centre, Adelaide, Australia
9. School of Medicine, Flinders University, Adelaide, Australia
10. Baker Heart and Diabetes Institute, Melbourne, Australia
11. Department of Diabetes and Endocrinology, Royal Melbourne Hospital, Melbourne, Australia
12. Department of Diabetes and Endocrinology, Westmead Hospital, Sydney, Australia
13. Sydney Medical School, University of Sydney, Sydney, Australia
14. NHMRC Clinical Trials Centre, University of Sydney, Sydney, Australia
15. Department of Endocrinology and Diabetes, Sir Charles Gairdner Hospital, Perth, Australia
16. Department of Diabetes and Endocrinology, Royal Hobart Hospital, Hobart, Australia
17. School of Psychology, Deakin University, Geelong, Australia

- 1
- 2
- 3 18. Australian Centre for Behavioural Research in Diabetes, Melbourne, Australia
- 4 19. Department of Pathology, St Vincent's Hospital Melbourne, Melbourne, Australia
- 5
- 6 20. Melbourne School of Population and Global Health, University of Melbourne,
- 7 Melbourne, Australia
- 8
- 9 21. Institute of Endocrinology and Diabetes, The Children's Hospital at Westmead, Sydney,
- 10 Australia
- 11
- 12 22. Department of Endocrinology and Diabetes and Centre for Hormone Research, Royal
- 13 Children's Hospital
- 14
- 15 23. Murdoch Children's Research Institute, Department of Paediatrics, University of
- 16 Melbourne, Melbourne, Australia
- 17
- 18 24. Endocrinology and Diabetes Centre, Women's and Children's Hospital, Adelaide,
- 19 Australia
- 20
- 21 25. Department of Endocrinology and Diabetes, John Hunter Children's Hospital, Newcastle,
- 22 Australia
- 23
- 24 26. Cairnmillar Institute, Melbourne, Australia
- 25
- 26
- 27

28 **Correspondence to**

29 Professor David O'Neal

30  
31 Department of Medicine, University of Melbourne, St Vincent's Hospital Melbourne

32  
33 PO Box 2900, Fitzroy VIC 3065, Australia

34  
35 Email: dno@unimelb.edu.au

36  
37 Telephone: +61 3 9231 2211

38  
39  
40  
41  
42 **Word count:** 4,183 words

## ABSTRACT

### Introduction

Manual determination of insulin dosing largely fails to optimise glucose control in type 1 diabetes. Automated insulin delivery via closed-loop systems has improved glucose control in short-term studies. Longer-term home-based studies of closed-loop system effects on glucose, psychosocial well-being, sleep and cognition are merited.

### Methods and analysis

This open-label, seven-centre, randomised controlled parallel group clinical trial will compare home-based hybrid closed-loop versus standard diabetes therapy in Australia. Adults aged  $\geq 25$  years with type 1 diabetes using intensive insulin therapy (via multiple daily injections or insulin pump, total enrolment target  $n=120$ ) will undertake a run-in period including diabetes and carbohydrate-counting education, clinical optimisation and baseline data collection. Participants will then be randomised 1:1 either to 26 weeks of MiniMed™ 670G hybrid closed-loop system therapy (Medtronic, Northridge, CA, USA) or continuation of their current diabetes therapy. The hybrid closed-loop system delivers insulin automatically to address basal requirements and correct to target glucose level, while bolus doses for meals require user initiation and carbohydrate estimation. Analysis will be intention-to-treat, with the primary outcome time in continuous glucose monitoring (CGM) target range (3.9–10.0 mmol/L) during the final 3 weeks of intervention. Secondary outcomes include: other CGM parameters, HbA<sub>1c</sub>, severe hypoglycaemia, psychosocial well-being, sleep, cognition, electrocardiography, costs, quality of life, biomarkers of vascular health and hybrid closed-loop system performance. Semi-structured interviews will assess the expectations and experiences of a sub-group of hybrid closed-loop users.

### Ethics and dissemination

The study has Human Research Ethics Committee approval. The study will be conducted in accordance with the principles of the Declaration of Helsinki and Good Clinical Practice. Results will be disseminated at scientific conferences and via peer-reviewed publications.

### Trial registration number

ACTRN12617000520336, pre-results



### Strengths and limitations of the study

- Multi-centre, randomised controlled parallel group trial of 26 weeks home-based hybrid closed-loop versus standard therapy
- Broad outcomes will be assessed in addition to glucose control: psychosocial, sleep, cognition, electrocardiography, vascular health biomarkers and health economic measures
- The standard therapy comparator—multiple daily insulin injections or insulin pump therapy, without real-time continuous glucose monitoring—reflects current practice in Australia for most adults with type 1 diabetes, though this may not reflect standard care in other countries
- The study emphasises education and clinical optimisation for all participants pre-randomisation, and the visit schedule is identical for both groups (by design, continuous glucose monitoring information is only available to the closed-loop group)
- This study of adults aged  $\geq 25$  years has glucose end-points aligned with a concurrent study examining hybrid closed-loop for young people aged 12 to  $< 25$  years, thereby facilitating comparison of metabolic outcomes between the two populations

## INTRODUCTION

Advances in type 1 diabetes insulin regimens and glucose monitoring have occurred over recent decades, facilitating improved glucose control and resulting in better health and quality of life.<sup>1-4</sup> The long-term vascular complications of type 1 diabetes are reduced by intensive insulin therapy compared with less intensive therapy.<sup>1 2</sup> Consequently, intensive insulin therapy—with subcutaneous administration via either multiple daily injections (MDI) or insulin pump therapy (IPT)—is a core strategy in current type 1 diabetes management.<sup>5</sup> Nevertheless, even with modern therapies, only 20–30% of adults with type 1 diabetes achieve HbA<sub>1c</sub> targets<sup>6 7</sup>, and long-term vascular complications and reduced life expectancy continue to be a reality for people with type 1 diabetes.<sup>8 9</sup>

Insulin requirements can vary unpredictably. They are impacted by time of day, meals, exercise, illness and antecedent hypoglycaemia. Manual determination of insulin dosing by people with type 1 diabetes requires continuous vigilance to maintain glucose levels within a healthy range. Insulin dosing decisions carry cognitive and emotional burden, and may be inconsistent due to fatigue, distress, fluctuating glucose levels or coexistent fear of hypoglycaemia. Hence, manual determination of insulin dosing represents an imperfect strategy to optimise glucose control. Further advances in technology are required to improve the match of insulin delivered to individuals' varying insulin requirements, and to minimise the burden of type 1 diabetes.

Closed-loop systems are designed to maintain glucose levels at a predetermined target by linking continuous glucose monitoring (CGM) information with an insulin dosing algorithm for automated subcutaneous insulin delivery by a pump.<sup>10</sup> These systems are being developed to address the need for improving glucose control while reducing the burden associated with treatment regimens. There is increasing scientific literature of randomised controlled studies reporting improved glucose control with short-term use of closed-loop systems (up to 3 months) compared with conventional insulin pumps.<sup>11-15</sup> A recent meta-analysis of outpatient randomised controlled trials with intervention periods ranging from 4 days to 12 weeks reported that single-hormone (insulin alone) closed-loop systems improve time-in-target glucose range and reduce time spent in hypoglycaemia compared with conventional IPT (with/without CGM).<sup>16</sup> Overall, time-in-target glucose range had a mean (95% confidence interval) absolute increase of 11.1% (6.9, 15.2), and the time spent in hypoglycaemia had an absolute reduction of 1.9% (0.4, 3.4). Studies in this meta-analysis used 'hybrid closed-loop' systems with automated insulin delivery to address basal requirements and correct to target

1  
2  
3 glucose, and user-initiated bolus insulin to address carbohydrate consumption. Results from a  
4 short-term randomised crossover study challenging a closed-loop system with both moderate-  
5 and high-intensity exercise indicated that closed-loop glucose control was safe; only a single  
6 episode of mild hypoglycaemia occurred and marked hyperglycaemic excursions were  
7 limited.<sup>17</sup> In an uncontrolled study, there were no safety concerns when 14 participants used  
8 free-living closed-loop 24/7 for 6 months.<sup>18</sup>

9  
10  
11  
12  
13 For individuals with type 1 diabetes, both hypoglycaemia and hyperglycaemia can affect  
14 physical and emotional well-being, quality of life, and activities of daily living such as  
15 driving.<sup>4 19-21</sup> Moreover, type 1 diabetes places significant burden on caregivers, families,  
16 workplaces and health services.<sup>22-24</sup> Closed-loop technology has shown promise to address  
17 the limitations of current therapy in relation to these burdens.<sup>25</sup> Qualitative and small-scale  
18 quantitative sub-studies in closed-loop trials have shown user acceptability and treatment  
19 satisfaction are high with closed-loop systems in home settings, particularly for overnight use  
20 when there is minimal manual interaction for meals and activity.<sup>26-28</sup> Although intrusive  
21 device alerts, device size and technical difficulties can negatively affect the overall  
22 experience, users typically report benefits outweighing annoyances, which they anticipate  
23 will be overcome with future iterations of the technology.<sup>27-29</sup> However, the only published  
24 randomised closed-loop trial involving adults to have included established, validated  
25 psychological measures, reported no between-group differences in treatment satisfaction or  
26 fear of hypoglycaemia.<sup>30</sup>

27  
28  
29  
30  
31  
32  
33  
34  
35  
36 HbA<sub>1c</sub>, a measurement of average glycaemia during the preceding 10–12 weeks, predicts the  
37 risk of developing long-term complications and is valuable for assessing glycaemic trends in  
38 populations over time.<sup>1 2 31</sup> However, HbA<sub>1c</sub> cannot provide information about glucose  
39 variability or time-in-target glucose range, and is even considered an unreliable indicator of  
40 an individual's mean glucose.<sup>32</sup> A recent large longitudinal registry study reported lower  
41 cardiovascular and all-cause mortality in individuals using IPT compared with MDI, even  
42 without between-group differences in HbA<sub>1c</sub>.<sup>33</sup> The mortality difference observed may have  
43 been attributable to factors such as time-in-target glucose range or glucose variability (not  
44 reflected in HbA<sub>1c</sub>). Consequently, HbA<sub>1c</sub> may be of limited value in comparison with CGM  
45 when assessing an individual's glucose levels in response to automated closed-loop insulin  
46 delivery.

47  
48  
49  
50  
51  
52  
53  
54  
55  
56  
57  
58  
59  
60  
With short-term randomised controlled studies of closed-loop systems (conducted in  
camp/hotel and home settings) demonstrating improvements in glucose control,<sup>16</sup> it remains

1  
2  
3 to be determined whether these findings are sustained in the longer term in the home setting  
4 and whether diabetes-related vascular complications may be influenced. Longer-term  
5 randomised controlled home-based studies—with closed-loop implemented day and night—  
6 are required. In addition, the impact of closed-loop insulin delivery on patient-reported  
7 outcomes such as fear of hypoglycaemia, treatment satisfaction, sleep quality and cognition  
8 remains a significant gap in the evidence base.<sup>34</sup> Finally, the benefits associated with this new  
9 technology need to be balanced against its cost.

14 In Australia, the government presently subsidises the purchase of insulin, injection needles,  
15 blood glucose monitoring strips and insulin pump delivery consumables for people with type  
16 1 diabetes.<sup>35</sup> Insulin pumps are not government-subsidised, but are available via either direct  
17 purchase or in conjunction with a private health insurance fund. CGM is government-  
18 subsidised only for eligible individuals under 21 years of age.<sup>36</sup> As a result, only a small  
19 fraction of adults with type 1 diabetes use CGM on a regular basis. Hence, standard diabetes  
20 therapy for adults in Australia currently involves subcutaneous intensive insulin therapy  
21 delivered via either MDI or pump, together with finger-prick blood glucose monitoring.

28 We hypothesise that hybrid closed-loop insulin delivery compared with manual insulin  
29 dosing will improve glucose control and non-glucose outcomes for adults with type 1  
30 diabetes. The overall aim of the study is to evaluate the efficacy of 6 months of hybrid  
31 closed-loop insulin delivery on glucose control, psychosocial well-being, sleep quality,  
32 cognition and markers of vascular disease risk compared with standard diabetes therapy for  
33 adults with type 1 diabetes.

## 38 **METHODS AND ANALYSIS**

### 41 **Overview**

42 This open-label, randomised controlled parallel group clinical trial will compare 26 weeks of  
43 hybrid closed-loop therapy versus ‘standard therapy’ for 120 adults (aged  $\geq 25$  years) with  
44 type 1 diabetes (protocol version 2.0, dated 29 March 2017). The standard therapy  
45 comparator consists of insulin delivered via either MDI or IPT, without real-time continuous  
46 glucose monitoring (RT-CGM), and was chosen to reflect current self-management of type 1  
47 diabetes among adults in Australia.

52 The study is being conducted at seven university hospitals across Australia. The University of  
53 Melbourne is the coordinating academic institution, with St Vincent’s Hospital Melbourne  
54 (Melbourne) the study sponsor and lead clinical site. Other clinical sites are: Flinders Medical  
55

Centre (Adelaide), Royal Hobart Hospital (Hobart), Royal Melbourne Hospital (Melbourne), Sir Charles Gairdner Hospital (Perth), The Alfred and Baker Heart and Diabetes Institute (Melbourne) and Westmead Hospital (Sydney). Other academic institutions involved are Sydney University and Deakin University. In parallel, a similar study of younger people (aged 12 to <25 years) with type 1 diabetes is being undertaken in Australia; the hybrid closed-loop system and primary outcome are aligned for the two studies.

### Study outcomes

The study outcomes are listed in Table 1.

**Table 1: Study outcomes**

#### *Primary outcome*

The proportion of time sensor glucose is in target range (3.9–10.0 mmol/L) with hybrid closed-loop versus standard therapy (MDI or IPT without RT-CGM), measured by masked CGM at 23–26 weeks post-randomisation.

#### *Secondary outcomes*

Hybrid closed-loop therapy versus standard therapy (overall and for each of baseline MDI and IPT separately) for the measures listed below.

1. Glucose control:
  - a. Masked CGM metrics for 24 h/day, day [06:00–00:00] and night [00:00–06:00] (measured at mid-study, end-of-study, and mid-study plus end-of-study combined):
    - i. Proportion of time spent 3.9–10.0 mmol/L (excluding the primary outcome)
    - ii. Proportion of time spent <2.8 mmol/L
    - iii. Proportion of time spent <3.3 mmol/L
    - iv. Proportion of time spent <3.9 mmol/L
    - v. Proportion of time spent 3.9–7.8 mmol/L
    - vi. Proportion of time spent >10.0 mmol/L
    - vii. Proportion of time spent >13.9 mmol/L
    - viii. Proportion of time spent >16.7 mmol/L
    - ix. SD and coefficient of variation
    - x. Mean glucose
  - b. Fasting capillary blood glucose
  - c. HbA<sub>1c</sub>
  - d. 1,5-anhydroglucitol
  - e. Symptomatic hypoglycaemia (with blood glucose <3.5 mmol/L) requiring carbohydrate rescue (*n*)
2. Clinical:
  - a. Change in total daily dose of insulin, and basal/bolus proportions
  - b. Change in insulin-to-carbohydrate ratio
  - c. Change in body weight
3. Psychosocial, sleep and cognitive functioning:
  - a. Treatment satisfaction: The Diabetes Treatment Satisfaction Questionnaire (DTSQ) status

- and change versions
- b. Satisfaction with technology: Diabetes Management Experiences Questionnaire (DME-Q)
  - c. Fear of hypoglycaemia: Hypoglycaemia Fear Survey short form (HFS-SF)
  - d. Fear of hyperglycaemia: Hyperglycaemia Avoidance Scale (HAS)
  - e. Hypoglycaemia Awareness: Gold Score
  - f. Diabetes distress: Problem Areas in Diabetes (PAID)
  - g. Diabetes-specific quality of life: DAWN Impact of Diabetes profile (DIDP)
  - h. Diabetes-specific positive well-being: Well-being Questionnaire (W-BQ28) Positive Diabetes Well-being Subscale
  - i. Cognitive function: Prospective and Retrospective Memory Questionnaire (PRMQ) and Psychomotor Vigilance Task (PVT-192)
  - j. Driving: proportion of time-in-target glucose range while driving (Melbourne sites only)
  - k. Sleep quality: Actigraph data, Pittsburgh Sleep Quality Index, Karolinska Sleepiness Scale
4. Electrocardiograph profile (via Holter monitor)
- a. Corrected QT interval (QT<sub>c</sub>)
  - b. Heart rate
  - c. Cardiac arrhythmias
5. Human-technology interaction (participants using hybrid closed-loop system):
- a. Participant perceptions of the hybrid closed-loop system assessed via SMS data collection
  - b. Participant expectations and experiences with the hybrid closed-loop system assessed via longitudinal semi-structured interviews (Melbourne sites only)
6. Health economic:
- a. Quality-adjusted life years calculated from the EQ-5D-5L
  - b. Hypoglycaemic events and HbA<sub>1c</sub>
  - c. Participant and family reporting on work interruption
  - d. Reported time spent on training, education and support, by the type of health professional resource used
  - e. Diabetes management consumables (glucose strips, ketone strips, batteries, sensors, site dressings, lancets, needles, insulin)
  - f. Resource utilisation tracked via linked administrative data from the Australian Medicare Benefits Schedule and Pharmaceutical Benefits Scheme
7. Biochemical markers of vascular disease risk:
- a. Cell adhesion molecules
  - b. Oxidised low-density lipoprotein
  - c. Myeloperoxidase
  - d. MicroRNA signatures for arterial, renal and retinal complications
  - e. Telomerase
  - f. DNA methylation/acetylation
  - g. Isoprostanes (blood and urine) and proteomics
  - h. Clotting profile
8. Hybrid closed-loop system performance parameters:
- a. Proportion of time closed-loop active
  - b. Unplanned exits from closed-loop (*n*)
  - c. Sensor performance versus blood glucose meter as measured by MARD and sensor failures (*n*)
  - d. Reported insulin delivery line failures (*n*)
  - e. Participant calls to the technical help line (*n*)

9. Safety:

- a. Hospitalisations for diabetic ketoacidosis (*n*)
- b. Severe hypoglycaemia, defined as hypoglycaemia requiring the assistance of another person to actively administer carbohydrate, glucagon, or take other corrective actions (*n*)

The primary study outcome is the proportion of sensor glucose time-in-target range (3.9–10.0 mmol/L) with hybrid closed-loop versus standard therapy, measured by masked CGM 23–26 weeks post-randomisation. This primary end-point was selected to provide the best indication of individual participants' glucose control. The 3.9–10.0 mmol/L glucose range is aligned with outcome metrics proposed by the JDRF Artificial Pancreas Project Consortium, is consistent with available data relating glucose control and complication prevention, and represents a realistic glucose target.<sup>32 37</sup>

CGM study outcome data will be collected by identical methods for participants in both groups. Hence, participants assigned hybrid closed-loop therapy will wear two identical glucose sensors for 2 weeks mid-study and 3 weeks at end-of-study—one sensor providing RT-CGM information to the user and directly linking to the hybrid closed-loop system, and a second sensor collecting masked CGM study outcome data. The closed-loop system performance parameters chosen as study outcome measures are based upon an international consensus report for outcomes measures in closed-loop trials.<sup>37</sup>

For closed-loop technology to achieve long-term clinical benefits, then in addition to positively impacting biomedical outcomes, user acceptance, uptake and adaptations are required.<sup>28 38</sup> Therefore, this study will assess aspects of psychosocial well-being via both subjective (questionnaires, interviews) and objective (actigraph, psychomotor task) methods. This holistic approach will progress understanding of the human factors involved, thereby enabling adaption of the technology in line with the person's expectations and experiences.<sup>39</sup> The study will also assess whether CGM has an impact on utilisation of health services and medications.

### Eligibility

Inclusion and exclusion criteria for participation are listed in Table 2.

**Table 2: Eligibility*****Inclusion criteria***

- Type 1 diabetes (as defined by the American Diabetes Association)<sup>40</sup> for at least 1 year
- Insulin regimen consisting of either:
  - MDI with  $\geq 4$  injections per day (including  $\geq 3$  rapid-acting insulin injections and  $\geq 1$  long-acting insulin injection); or
  - IPT established for  $\geq 3$  months
- Age 25–70 years inclusive
- HbA1c  $\leq 10.5\%$  ( $\leq 91$  mmol/mol)
- Living in an area with internet and cellular phone coverage
- English speaking proficiency

***Exclusion criteria***

- Chronic kidney disease (eGFR  $< 45$  mL/min/1.73m<sup>2</sup>)
- Current use of RT-CGM (defined as use  $> 25\%$  of the time during the past 3 months)
- Use of any non-insulin glucose-lowering agent within the past 3 months
- Oral or injected steroid use within the past 3 months
- Pregnancy, or pregnancy planned within study period
- Untreated coeliac disease or other malabsorption
- Uncontrolled thyroid disease
- Clinically-significant gastroparesis
- Uncontrolled hypertension (blood pressure: diastolic  $> 100$  or systolic  $> 160$  mmHg)
- History of myocardial infarction, severe uncontrolled heart failure, unstable angina, transient ischaemic attack, stroke, or thromboembolic disease in the past 3 months
- Poor visual acuity precluding use of the study technology
- Inability or unwillingness to meet protocol requirements
- Any severe or unstable medical or psychological condition which, in the opinion of the investigator, would compromise the ability to meet protocol requirements

The minimum inclusion age of 25 years was chosen to reflect a general adult population with type 1 diabetes while avoiding potential confounders associated with adolescence and emerging adulthood. This decision was informed by results of previous type 1 diabetes CGM and closed-loop studies, where individuals aged  $< 25$  years differed from those aged  $\geq 25$  years.<sup>14 41</sup>



1  
2  
3 Use of RT-CGM >25% of the time precludes inclusion. This decision was informed by study  
4 findings that adults aged  $\geq 25$  years with type 1 diabetes using RT-CGM with warning alarms  
5 had improved glucose control without increase in biochemical hypoglycaemia only when RT-  
6 CGM was worn  $\geq 5-6$  days/week.<sup>41-43</sup> When CGM is used less often or without warning  
7 alarms, evidence suggests no glucose control benefit.  
8  
9

## 10 11 **Study diabetes management devices**

### 12 Hybrid closed-loop system

13  
14 The study hybrid closed-loop is the MiniMed™ 670G system, comprising a glucose sensor  
15 and transmitter coupled with an insulin pump containing a closed-loop algorithm (Medtronic,  
16 Northridge, CA, USA), and rapid-acting analogue insulin (either insulin aspart or insulin  
17 lispro) delivered subcutaneously. CGM data are transmitted to the pump every 5 minutes and  
18 the algorithm calculates the basal insulin dose (delivered at 5 min intervals) required to  
19 maintain the target glucose level. The algorithm uses a modified proportional integrative  
20 derivative model with insulin feedback based on an insulin delivery algorithm originally  
21 developed by Steil et al.<sup>44</sup> The algorithm also incorporates a supervisory model predictive  
22 component aiming to avoid insulin over-delivery.<sup>45</sup> For meals, the user estimates the amount  
23 of carbohydrate to be consumed (entering this into the pump) and checks their capillary blood  
24 glucose level. Using this information, an insulin bolus is calculated and delivered according  
25 to the individualised insulin-to-carbohydrate ratio and an insulin sensitivity factor determined  
26 by the algorithm (should a correction bolus be required).  
27  
28

29  
30 The MiniMed™ 670G system has been deemed safe and effective for glucose control in a 3-  
31 month uncontrolled study<sup>46 47</sup> and an exercise study.<sup>17</sup> The system was approved for use by  
32 the US Food and Drug Administration in 2016.  
33  
34

### 35 Masked CGM

36  
37 CGM data masked to both the participants and research team will be collected for study  
38 outcome measurements at three time-points: baseline pre-randomisation (3 weeks), mid-study  
39 (2 weeks) and end-of-study (3 weeks). For participants randomised to hybrid closed-loop, this  
40 masked CGM data collection will be in addition to the system's RT-CGM. The study uses  
41 Guardian™ Sensor 3 glucose sensors (Medtronic, Northridge, CA, USA). This sensor  
42 configuration has reported performance parameters of mean absolute relative difference  
43 (MARD)  $\pm$  standard deviation (SD) of  $9.6\% \pm 9.0\%$  and mean functional sensor life of  $146 \pm$   
44  $39$  h when used with a Medtronic MiniMed™ 640G insulin pump.<sup>48</sup> By using a separate  
45  
46  
47  
48  
49  
50  
51  
52  
53  
54  
55  
56  
57  
58  
59  
60

1  
2  
3 device to collect CGM study outcome data, the device under investigation is not also being  
4 used to evaluate its own performance.  
5

6  
7 For masked CGM data collection, the glucose sensor will be inserted and the sensor recorder  
8 will be connected by the study team. During masked CGM, participants will be required to  
9 test capillary blood glucose levels at least 4 times per day with a CONTOUR<sup>®</sup> NEXT LINK  
10 meter (details below). Masked CGM data are collected retrospectively by uploading the  
11 recorder and the meter.  
12  
13

#### 14 15 Blood glucose monitoring

16 All participants will be provided with a CONTOUR<sup>®</sup> NEXT LINK 2.4 blood glucose meter  
17 (Ascensia, Parsippany, NJ, USA) which is able to transmit data directly to the MiniMed<sup>™</sup>  
18 670G insulin pump. Pre-randomisation and for participants randomised to standard therapy,  
19 the CONTOUR<sup>®</sup> NEXT LINK 2.4 will be used in addition to their regular glucose meter  
20 during masked CGM. Use of the same glucose meter within the hybrid closed-loop system  
21 and for masked CGM calibration will standardise data collection.  
22  
23

24  
25  
26  
27 Participants using MDI at enrolment will also be provided with an ACCU-CHEK<sup>®</sup> Aviva  
28 Expert blood glucose meter (Roche Diagnostics, Mannheim, Germany), selected for its in-  
29 built 'bolus calculator'. The bolus calculator uses the measured blood glucose level,  
30 calculated rapid-acting 'insulin on board', and the programmed insulin sensitivity factor and  
31 insulin-to-carbohydrate ratio to determine the recommended insulin bolus doses. The use of a  
32 meter with bolus calculator by those in the control group who continue with MDI will reflect  
33 the bolus calculators used by participants randomised to hybrid closed-loop therapy and by  
34 those using IPT randomised to standard diabetes therapy.  
35  
36  
37  
38  
39

#### 40 Diabetes management software

41 CareLink<sup>™</sup>, an internet-based platform from Medtronic, will be used for uploading insulin  
42 pump, glucose sensor and glucose meter data. The hybrid closed-loop system data are  
43 uploaded to a computer via the system's glucose meter USB connection; insulin pump, sensor  
44 and meter data are then accessible to study investigators.  
45  
46  
47  
48

#### 49 **Study design**

50  
51 This is a prospective, open-label, parallel design randomised controlled study involving  
52 adults with type 1 diabetes (overall target  $n=120$ , with  $\geq 40\%$  using MDI and  $\geq 40\%$  using  
53 IPT). Study procedures will be undertaken by medical doctors with sub-speciality training in  
54 endocrinology, diabetes nurse educators, dieticians and research nurses. Throughout the  
55  
56  
57  
58  
59  
60

1  
2  
3 study, the time taken for participant education, training, clinical care and technical support  
4 will be recorded; the health professional time will be used in health economic analyses to  
5 determine implications for closed-loop becoming a mainstream therapy. Adherence to study  
6 protocols will be assessed at each study visit; verbal and written reminders of study  
7 instructions will be provided to improve protocol adherence. Participants will continue their  
8 usual diabetes clinical care with their treating clinicians during study participation.  
9 Participants will be randomised 1:1 either to hybrid closed-loop therapy or to continue using  
10 their current standard diabetes therapy (either MDI or IPT) for 26 weeks (Fig. 1). Use of RT-  
11 CGM will not be permitted during run-in or by participants randomised to standard diabetes  
12 therapy (though CGM without live alerts, e.g. Abbott FreeStyle® Libre, is permissible).  
13  
14  
15  
16  
17  
18

#### 19 Patient involvement

20  
21 Investigator discussions with patients throughout provision of clinical care and during  
22 previous research studies were taken into consideration when designing this study protocol.  
23 The burden of the study intervention will be assessed via SMS data collection and during  
24 semi-structured interviews (see Table 1, sections 5a and 5b).  
25  
26  
27

#### 28 **Sample size**

29  
30 The power calculation is for a parallel study design with two groups of equal size. It is based  
31 on SDs of the percentage time-in-target glucose range at 6 months (adjusted for baseline)  
32 observed for the subset of participants in two randomised clinical trials from the JDRF Study  
33 Group who had similar characteristics to participants being recruited here (Professor Roy  
34 Beck, personal communication). The SD (95% confidence interval) for pump users was 9%  
35 (8%, 12%) and for MDI users was 10% (7%, 19%).  
36  
37  
38  
39

40 From an initial overall sample size of  $n=120$ , with a dropout rate of 10%, a common SD of  
41 9% and a type I error rate of 5%, the power to detect a minimum absolute difference of 5%  
42 time-in-target glucose range would be 80%. A more conservative scenario with a dropout rate  
43 of 20%, and unequal SDs of 12% and 19% for pump and MDI users, respectively, increases  
44 the minimum detectable absolute difference to 9% with power of 80%.  
45  
46  
47  
48

#### 49 **Study schedule**

50  
51 The study will consist of 16 visits including the run-in and intervention periods. Key  
52 activities undertaken during each visit are shown in Table 3. Participants will be provided  
53 with 24-hour telephone contacts for support if required. Health professionals will log all time  
54 taken training and communicating with the study participants.  
55  
56  
57  
58  
59  
60

**Table 3: Study visits**

| Study Visit                                        | 1 | 2 | 3  | 4  | 5  | 6 | 7 | 8  | 9  | 10 | 11 | 12 | 13 | 14 | 15 | 16 | 17 |
|----------------------------------------------------|---|---|----|----|----|---|---|----|----|----|----|----|----|----|----|----|----|
| Weeks from randomisation                           |   |   | -3 | -2 | -1 | 0 | 1 | ~7 | 11 | 12 | 13 | 23 | 24 | 25 | 26 | 26 | 39 |
| Clinical assessment                                | X |   |    |    |    | X |   |    |    |    | X  |    |    |    |    | X  |    |
| Time with health professional                      |   | X | X  | X  | X  | X | X | X  | X  | X  | X  | X  | X  | X  | X  | X  |    |
| HbA <sub>1c</sub>                                  | X |   |    |    |    | X |   |    |    |    | X  |    |    |    |    | X  |    |
| β-hCG, C-peptide                                   | X |   |    |    |    |   |   |    |    |    |    |    |    |    |    |    |    |
| CHO-counting education                             |   | X |    |    |    |   |   |    |    |    | X  |    |    |    |    |    |    |
| Insulin pump training                              |   |   |    |    |    |   | X |    |    |    |    |    |    |    |    |    |    |
| Insulin dose review                                |   | X |    |    |    |   |   | X  |    |    | X  |    |    |    |    | X  |    |
| Logbook provision                                  |   |   | X  |    |    |   |   |    |    |    |    |    |    |    |    |    |    |
| Logbook data collection                            |   |   |    | X  | X  | X | X | X  | X  | X  | X  | X  | X  | X  | X  | X  |    |
| Masked CGM insertion                               |   |   | X  | X  | X  |   |   |    | X  | X  |    | X  | X  | X  |    |    |    |
| Glucose meter upload                               |   |   |    | X  | X  | X | X | X  | X  | X  | X  | X  | X  | X  | X  | X  |    |
| Psychosocial, sleep, cognitive functioning surveys | X |   |    |    |    |   |   |    |    |    | X  |    |    |    |    | X  |    |
| Cognitive performance device provision             |   |   | X  |    |    |   |   |    | X  |    |    | X  |    |    |    |    |    |
| Actigraphy & sleep diary provision                 |   |   | X  | X  | X  |   |   |    | X  | X  |    | X  | X  | X  |    |    |    |
| Semi-structured interviews                         |   |   |    |    |    |   | X |    | X  |    |    |    |    |    |    | X  | X  |
| Driving device and diary provision                 |   |   | X  | X  | X  |   |   |    | X  | X  |    | X  | X  | X  |    |    |    |
| Holter monitor provision                           |   |   | X  |    |    |   |   |    | X  |    |    | X  |    |    |    |    |    |
| Vascular disease risk markers                      |   |   |    |    |    | X |   |    |    |    |    |    |    |    |    | X  |    |

### Run-in period

After enrolment, there will be a run-in period lasting at least 5 weeks. Participants will undergo initial medical, psychosocial and cognitive assessments. Their diabetes-related knowledge and carbohydrate-counting proficiency will be assessed and their insulin dosing

1  
2  
3 will be optimised. Participants will be provided with detailed training and support to use the  
4 study glucose meters and masked CGM devices. Education will be provided by diabetes  
5 nurse educators and dietitians to optimise participants' diabetes self-management including  
6 carbohydrate-counting. The optimisation of carbohydrate-counting is central to baseline  
7 optimisation for all participants in the study—this aims to achieve the best possible match of  
8 bolus insulin doses to the individuals' requirements for the carbohydrate consumed for both  
9 groups, thereby testing the closed-loop aspect of the hybrid closed-loop system's insulin  
10 delivery in comparison with standard therapy.  
11  
12  
13  
14  
15

16 After provision of education, data will be collected for 3 weeks of baseline masked CGM,  
17 actigraphy (sleep data) and from the self-reported diabetes logbook. Driving log data (to  
18 associate with the CGM data) will also be collected during these 3 weeks for participants at  
19 the three clinical sites in Melbourne. At the end of the run-in period, the CGM data will be  
20 uploaded and checked to ensure data are available for at least 70% of the time.<sup>41</sup> If the  
21 minimum required CGM data are not available, an additional week of CGM will be  
22 undertaken to fulfil the protocol requirements. At the end of the run-in, baseline blood and  
23 urine samples will be collected for measurement of HbA<sub>1c</sub> and biochemical markers of  
24 vascular disease risk.  
25  
26  
27  
28  
29  
30

### 31 Randomisation

32 Eligible participants will be randomised after completing the run-in. Group allocation will be  
33 a 1:1 ratio using minimisation with three variables, all of which are expected to be highly  
34 prognostic of the primary outcome. These minimisation variables are: i) the proportion of  
35 time-in-target glucose range at baseline (dichotomised to  $\leq 50\%$  and  $> 50\%$ ); ii) study centre  
36 (seven clinical sites); and iii) insulin delivery modality (MDI or IPT). Randomisation will be  
37 performed by an independent group of statisticians using central randomisation software, and  
38 will be implemented into an electronic participant record system.  
39  
40  
41  
42  
43  
44

45 The nature of the study groups does not allow blinding of participants or investigators.

### 46 Intervention period

47 After randomisation, there will be a 26-week intervention period.

48 Participants randomised to standard therapy will continue using their current insulin delivery  
49 modality (MDI or IPT, with bolus calculator in the glucose meter or pump, respectively) and  
50 will be instructed to refrain from using RT-CGM during the study.  
51  
52  
53  
54  
55  
56  
57  
58  
59  
60

1  
2  
3 Participants randomised to hybrid closed-loop therapy will receive general insulin pump and  
4 CGM education and training, plus instruction regarding usage of the study hybrid closed-loop  
5 system. This education and training period may take up to 4 weeks (likely longer for those  
6 using MDI than IPT at baseline). The hybrid closed-loop system will be programmed with  
7 participants' usual insulin-to-carbohydrate ratios and insulin sensitivity factors, as well as  
8 their usual basal rates (or the basal rates determined by their clinicians for those participants  
9 transitioning from MDI). Participants will be provided with a 24-hour technical help  
10 telephone contact for the hybrid closed-loop system.  
11  
12

13  
14  
15  
16 Participants at the three clinical sites in Melbourne who are randomised to hybrid closed-loop  
17 therapy will undergo four semi-structured interviews to assess their expectations of, and  
18 experiences with, the technology. These interviews will be conducted at randomisation, then  
19 at 11 weeks, 26 weeks and 39 weeks post-randomisation.  
20  
21  
22

23 Participants will have mid-study data collected between 11 weeks to 13 weeks post-  
24 randomisation. Two weeks of masked CGM data, cognitive assessments and actigraphy will  
25 be collected, plus driving data for participants at the Melbourne sites. Clinical review with  
26 assessment of diabetes management and carbohydrate-counting, and adjustment of therapy  
27 and further education as required, will be undertaken 13 weeks post-randomisation. At this  
28 visit, psychosocial questionnaires will be completed and venous samples for HbA<sub>1c</sub> will be  
29 collected.  
30  
31  
32  
33

34  
35 Participants will have end-of-study data collected between 23 to 26 weeks post-  
36 randomisation. Three weeks of masked CGM data, cognitive assessments and actigraphy will  
37 be collected, plus driving data for participants at the Melbourne sites. At the end of the three-  
38 week period, the CGM data will be uploaded and checked for available data at least 70% of  
39 the time. If 70% of CGM data are not available, an additional week of CGM data will be  
40 collected. At the end-of-study visit (26 weeks post-randomisation), psychosocial  
41 questionnaires will be completed, and venous and urine samples will be collected for HbA<sub>1c</sub>  
42 and biochemical markers of vascular disease risk. Participants in the hybrid closed-loop  
43 group will change back to using their usual insulin delivery modality (MDI or IPT). Doctor  
44 visit data from the Medicare Benefits Schedule and insulin prescription data from the  
45 Pharmaceutical Benefits Scheme will be accessed for study participants.  
46  
47  
48  
49  
50  
51  
52  
53  
54  
55  
56  
57  
58  
59  
60

### Statistical methods

The primary analysis will assess differences in the proportion of time-in-target glucose sensor range (3.9–10.0 mmol/L) with hybrid closed-loop versus standard therapy, measured by masked CGM at 23–26 weeks post-randomisation on an intention-to-treat basis using analysis of covariance (ANCOVA) with adjustment for baseline time-in-target range. A *p*-value threshold of <0.05 will be used to determine statistical significance.

Model fit will be evaluated by exploration of residuals. If the model is of poor fit, the outcome variable will be transformed and the model refitted and evaluated. If unsuccessful, nonparametric analysis will be performed.

Analysis of continuous secondary outcomes will also use ANCOVA with adjustment for baseline time-in-target range, whereas Poisson or negative binomial regression will be used for count outcomes and logistic regression will be used for binary outcomes. Subgroup analysis by baseline insulin delivery modality will be performed by inclusion of an interaction term in the regression modelling or by a stratified analysis when non-parametric methods are used.

No adjustment for multiplicity is planned. All results for primary and secondary outcomes will be reported.<sup>49</sup> No interim analysis is planned.

### Health economic evaluation

An economic evaluation will determine the incremental cost of home-based hybrid closed-loop versus standard diabetes therapy in Australia. This analysis will quantify costs directly associated with hybrid closed-loop and standard diabetes therapy plus other impacts on the health system (Table 1). Outcomes will be assessed in quality-adjusted life years for changes in health-related quality of life, and for the likely long-term impact of changes in glucose control on long-term outcomes using a type 1 diabetes simulation model.

### Safety assessments

Safety parameters to be assessed include severe hypoglycaemia, ketoacidosis, and unplanned hospitalisations directly related to the study (Table 1).

### Efficacy assessments

Efficacy parameters to be assessed include glucose control, clinical measures, psychosocial and cognitive functioning, human-technology interaction, health economic measures and biochemical markers of vascular disease risk (Table 1).

### **Closed-loop system performance parameters**

Closed-loop system performance parameters to be assessed relate to the system overall, to individual system components and to system usability (Table 1).

### **Trial oversight**

The study will be conducted in accordance with the principles of the Declaration of Helsinki and guidelines for Good Clinical Practice (GCP).

The day-to-day study management will be the responsibility of the investigators at each clinical site. The Principal Investigator and study project manager will maintain regular correspondence with all investigators and study coordinators. The Principal Investigator, with the sites' lead investigators, will assume responsibility for the progress of the study in accordance with agreed timelines and milestones with the study funders. A combined data safety and monitoring board (DSMB) will be established for this study and the aligned study, independent from the study investigators, comprising adult and paediatric physicians experienced in statistics and clinical trials. The study project manager will liaise with the study teams in all centres to establish procedures and ensure that the study is carried out according to the protocol and to standards of GCP, with robust systems for reporting adverse events. The study project manager will be responsible for the central preparations of data for presentation to the DSMB.

### **ETHICS AND DISSEMINATION**

The study has received ethics approval from the lead site Human Research Ethics Committee. Other clinical sites provide oversight through local governance committees. Any substantial amendments to the study protocol will be reported to the lead site ethics committee for approval prior to implementation, and updated on the trial registry, with the study investigators being advised in writing.

All potential participants will be provided with written and verbal information regarding the study, the procedures involved and all potential risks related to participating. A study investigator will obtain written informed consent from each participant prior to commencing study procedures. All personal information about potential and enrolled participants will be de-identified to protect confidentiality before, during and after the trial. Standard operating procedures for reporting all adverse events, device-related adverse events and severe adverse events will be in place. The Human Research Ethics Committees and the Therapeutic Goods



Administration of Australia will be informed of any serious adverse events and any unexpected device-related adverse events.

Screening and recruitment commenced in May 2017. It is anticipated that the study visits will be completed by May 2019. The results of the study will be disseminated at national and international conferences and by peer-reviewed publications. Participants will be provided with a summary of the study results by their site's lead investigator.

### **Acknowledgments**

We thank Professor Roman Hovorka and Professor Roy Beck for their expert advice regarding study design.

### **Contributors**

SAM, MIDB, PGC, AJJ, ACK, JS, GMW, TWJ and DNO designed the study. SAM and DNO drafted the manuscript. SAM, MIDB, VS, MHL, BP, GAR, LAB, MGB, FJC, PMC, NDC, PGC, EAD, JMF, CH, DJH, JCH, AJJ, JK, ACK, BRK, KK, RJM, RWM, JAN, CS, JS, SNS, ST, GMW, SV, TWJ and DNO contributed to the writing and/or critical review of the study protocol and reviewed this manuscript for intellectual content. DNO is the principal investigator and guarantor.

### **Funding**

This study is funded by the Australian Research Council (with the funding administered by JDRF Australia), and by the National Health and Medical Research Council of Australia. Material support is being provided via a grant from the Medtronic External Research Program. SAM is supported by a JDRF Early-Career Patient-Orientated Diabetes Research Award. MIDB was supported by a Raine Clinical Research Fellowship. AJJ is supported by an NHMRC Practitioner Fellowship. JS is supported by core funding to the Australian Centre for Behavioural Research in Diabetes provided by Diabetes Victoria and Deakin University.

The study funders and sponsor did not have any role in study design or contribution to this manuscript, and they will not be involved in collection, management, analysis or interpretation of the data. The study funders will not have any role in writing the study report or the decision to submit the report for publication.

### **Competing interests**

MIDB and NDC report receiving speaker honoraria from Medtronic. DJH reports receiving speaker and advisory board honoraria from Medtronic. RWM reports receiving conference

travel and accommodation support from Medtronic. JS reports that the ACBRD has received honoraria from Medtronic in relation to her speaking engagements and role in advisory boards. DNO reports receiving speaker honoraria and research grants from Medtronic.

### Ethics approval

St Vincent's Hospital Melbourne Human Research Ethics Committee (lead site, approval number HREC-D 088/16).

### REFERENCES

1. DCCT Research Group. The effect of intensive treatment of diabetes on the development and progression of long-term complications in insulin-dependent diabetes mellitus. *N Engl J Med* 1993;329(14):977-86. [published Online First: 1993/09/30]
2. Nathan DM, Cleary PA, Backlund JY, et al. Intensive diabetes treatment and cardiovascular disease in patients with type 1 diabetes. *N Engl J Med* 2005;353(25):2643-53. doi: 10.1056/NEJMoa052187
3. Nathan DM, DCCT/EDIC Research Group. The diabetes control and complications trial/epidemiology of diabetes interventions and complications study at 30 years: overview. *Diabetes Care* 2014;37(1):9-16. doi: 10.2337/dc13-2112
4. Rubin RR, Peyrot M. Quality of life and diabetes. *Diabetes Metab Res Rev* 1999;15(3):205-18.
5. American Diabetes Association. *Pharmacologic approaches to glycemic treatment. Sec. 8. In Standards of Medical Care in Diabetes—2017. Diabetes Care* 2017;40(Suppl 1):S64-S74. doi: 10.2337/dc17-S011
6. Beck RW, Tamborlane WV, Bergenstal RM, et al. The T1D Exchange clinic registry. *J Clin Endocrinol Metab* 2012;97(12):4383-9. doi: 10.1210/jc.2012-1561
7. McKnight JA, Wild SH, Lamb MJ, et al. Glycaemic control of Type 1 diabetes in clinical practice early in the 21st century: an international comparison. *Diabet Med* 2015;32(8):1036-50. doi: 10.1111/dme.12676
8. Huo L, Harding JL, Peeters A, et al. Life expectancy of type 1 diabetic patients during 1997-2010: a national Australian registry-based cohort study. *Diabetologia* 2016;59(6):1177-85. doi: 10.1007/s00125-015-3857-4
9. Huo L, Shaw JE, Wong E, et al. Burden of diabetes in Australia: life expectancy and disability-free life expectancy in adults with diabetes. *Diabetologia* 2016;59(7):1437-45. doi: 10.1007/s00125-016-3948-x
10. Thabit H, Hovorka R. Coming of age: the artificial pancreas for type 1 diabetes. *Diabetologia* 2016;59(9):1795-805. doi: 10.1007/s00125-016-4022-4
11. Leelarathna L, Dellweg S, Mader JK, et al. Day and night home closed-loop insulin delivery in adults with type 1 diabetes: three-center randomized crossover study. *Diabetes Care* 2014;37(7):1931-7. doi: 10.2337/dc13-2911
12. Nimri R, Muller I, Atlas E, et al. MD-Logic overnight control for 6 weeks of home use in patients with type 1 diabetes: randomized crossover trial. *Diabetes Care* 2014;37(11):3025-32. doi: 10.2337/dc14-0835
13. Thabit H, Tauschmann M, Allen JM, et al. Home Use of an Artificial Beta Cell in Type 1 Diabetes. *N Engl J Med* 2015;373(22):2129-40. doi: 10.1056/NEJMoa1509351
14. Sharifi A, De Bock MI, Jayawardene D, et al. Glycemia, Treatment Satisfaction, Cognition, and Sleep Quality in Adults and Adolescents with Type 1 Diabetes When Using a Closed-Loop System Overnight Versus Sensor-Augmented Pump with Low-Glucose Suspend Function: A Randomized Crossover Study. *Diabetes Technol Ther* 2016;18(12):772-83. doi: 10.1089/dia.2016.0288
15. Bally L, Thabit H, Kojzar H, et al. Day-and-night glycaemic control with closed-loop insulin delivery versus conventional insulin pump therapy in free-living adults with well controlled

- 1  
2  
3 type 1 diabetes: an open-label, randomised, crossover study. *Lancet Diabetes Endocrinol*  
4 2017;5(4):261-70. doi: 10.1016/S2213-8587(17)30001-3 [published Online First: 2017/01/18]
- 5 16. Weisman A, Bai JW, Cardinez M, et al. Effect of artificial pancreas systems on glycaemic control  
6 in patients with type 1 diabetes: a systematic review and meta-analysis of outpatient  
7 randomised controlled trials. *Lancet Diabetes Endocrinol* 2017 doi: 10.1016/S2213-  
8 8587(17)30167-5
- 9 17. Jayawardene DC, McAuley SA, Horsburgh JC, et al. Closed-Loop Insulin Delivery for Adults  
10 with Type 1 Diabetes Undertaking High-Intensity Interval Exercise Versus Moderate-  
11 Intensity Exercise: A Randomized, Crossover Study. *Diabetes Technol Ther* 2017;19(6):340-  
12 48. doi: 10.1089/dia.2016.0461
- 13 18. Kovatchev B, Cheng P, Anderson SM, et al. Feasibility of Long-Term Closed-Loop Control: A  
14 Multicenter 6-Month Trial of 24/7 Automated Insulin Delivery. *Diabetes Technol Ther*  
15 2017;19(1):18-24. doi: 10.1089/dia.2016.0333 [published Online First: 2016/12/17]
- 16 19. Cox DJ, Kovatchev BP, Anderson SM, et al. Type 1 diabetic drivers with and without a history of  
17 recurrent hypoglycemia-related driving mishaps: physiological and performance differences  
18 during euglycemia and the induction of hypoglycemia. *Diabetes Care* 2010;33(11):2430-5.  
19 doi: 10.2337/dc09-2130
- 20 20. Chiang JL, Kirkman MS, Laffel LM, et al. Type 1 diabetes through the life span: a position  
21 statement of the American Diabetes Association. *Diabetes Care* 2014;37(7):2034-54. doi:  
22 10.2337/dc14-1140
- 23 21. Hendrieckx C, Halliday JA, Bowden JP, et al. Severe hypoglycaemia and its association with  
24 psychological well-being in Australian adults with type 1 diabetes attending specialist tertiary  
25 clinics. *Diabetes Res Clin Pract* 2014;103(3):430-6. doi: 10.1016/j.diabres.2013.12.005
- 26 22. Goss J. Projection of Australian health care expenditure by disease, 2003 to 2033. Cat. no. HWE  
27 43. Canberra: AIHW., 2008.
- 28 23. Colagiuri S, Brnabic A, Gomez M, et al. DiabCoSt Australia Type 1: Assessing the burden of  
29 Type 1 Diabetes in Australia: Diabetes Australia, Canberra., 2009.
- 30 24. Tao B, Pietropaolo M, Atkinson M, et al. Estimating the cost of type 1 diabetes in the U.S.: a  
31 propensity score matching method. *PLoS One* 2010;5(7):e11501. doi:  
32 10.1371/journal.pone.0011501
- 33 25. Barnard KD, Hood KK, Weissberg-Benchell J, et al. Psychosocial assessment of artificial  
34 pancreas (AP): commentary and review of existing measures and their applicability in AP  
35 research. *Diabetes Technol Ther* 2015;17(4):295-300. doi: 10.1089/dia.2014.0305
- 36 26. Barnard KD, Wysocki T, Allen JM, et al. Closing the loop overnight at home setting: psychosocial  
37 impact for adolescents with type 1 diabetes and their parents. *BMJ Open Diabetes Res Care*  
38 2014;2(1):e000025. doi: 10.1136/bmjdr-2014-000025 [published Online First: 2014/12/03]
- 39 27. Barnard KD, Wysocki T, Thabit H, et al. Psychosocial aspects of closed- and open-loop insulin  
40 delivery: closing the loop in adults with Type 1 diabetes in the home setting. *Diabet Med*  
41 2015;32(5):601-8. doi: 10.1111/dme.12706 [published Online First: 2015/01/24]
- 42 28. Hendrieckx C, Poole LA, Sharifi A, et al. "It Is Definitely a Game Changer": A Qualitative Study  
43 of Experiences with In-home Overnight Closed-Loop Technology Among Adults with Type 1  
44 Diabetes. *Diabetes Technol Ther* 2017;19(7):410-16. doi: 10.1089/dia.2017.0007
- 45 29. Barnard KD, Wysocki T, Ully V, et al. Closing the Loop in Adults, Children and Adolescents  
46 With Suboptimally Controlled Type 1 Diabetes Under Free Living Conditions: A  
47 Psychosocial Substudy. *J Diabetes Sci Technol* 2017;11(6):1080-88. doi:  
48 10.1177/1932296817702656 [published Online First: 2017/04/04]
- 49 30. Kropff J, DeJong J, Del Favero S, et al. Psychological outcomes of evening and night closed-loop  
50 insulin delivery under free living conditions in people with Type 1 diabetes: a 2-month  
51 randomized crossover trial. *Diabet Med* 2017;34(2):262-71. doi: 10.1111/dme.13268  
52 [published Online First: 2016/10/30]
- 53 31. DCCT Research Group. The relationship of glycemic exposure (HbA1c) to the risk of  
54 development and progression of retinopathy in the diabetes control and complications trial.  
55 *Diabetes* 1995;44(8):968-83.

32. Beck RW, Connor CG, Mullen DM, et al. The Fallacy of Average: How Using HbA1c Alone to Assess Glycemic Control Can Be Misleading. *Diabetes Care* 2017;40(8):994-99. doi: 10.2337/dc17-0636
33. Steineck I, Cederholm J, Eliasson B, et al. Insulin pump therapy, multiple daily injections, and cardiovascular mortality in 18,168 people with type 1 diabetes: observational study. *BMJ* 2015;350:h3234. doi: 10.1136/bmj.h3234
34. Barnard KD, Venkat MV, Close K, et al. PsychDT Working Group: Report Psychosocial Aspects of Artificial Pancreas Systems. *J Diabetes Sci Technol* 2015;9(4):925-8. doi: 10.1177/1932296815588332
35. National Diabetes Services Scheme. Product and supply 2017 [Available from: <https://www.ndss.com.au/product-and-supply> accessed 22 June 2017.
36. National Diabetes Services Scheme. Continuous Glucose Monitoring 2017 [Available from: <https://www.ndss.com.au/cgm> accessed 22 June 2017.
37. Maahs DM, Buckingham BA, Castle JR, et al. Outcome Measures for Artificial Pancreas Clinical Trials: A Consensus Report. *Diabetes Care* 2016;39(7):1175-9. doi: 10.2337/dc15-2716
38. Gonder-Frederick LA, Shepard JA, Grabman JH, et al. Psychology, technology, and diabetes management. *Am Psychol* 2016;71(7):577-89. doi: 10.1037/a0040383
39. Gonder-Frederick LA, Grabman JH, Shepard JA. Human Factor Considerations for Artificial Pancreas Research. *Diabetes Technol Ther* 2016;18(12):762-64. doi: 10.1089/dia.2016.0403
40. American Diabetes Association. Classification and Diagnosis of Diabetes Sec. 2. In Standards of Medical Care in Diabetes—2017. *Diabetes Care* 2017;40(Suppl 1):S11-S24. doi: 10.2337/dc17-S005
41. JDRF CGM Study Group. Continuous glucose monitoring and intensive treatment of type 1 diabetes. *N Engl J Med* 2008;359(14):1464-76. doi: 10.1056/NEJMoa0805017
42. JDRF CGM Study Group. The effect of continuous glucose monitoring in well-controlled type 1 diabetes. *Diabetes Care* 2009;32(8):1378-83. doi: 10.2337/dc09-0108
43. O'Connell MA, Donath S, O'Neal DN, et al. Glycaemic impact of patient-led use of sensor-guided pump therapy in type 1 diabetes: a randomised controlled trial. *Diabetologia* 2009;52(7):1250-7. doi: 10.1007/s00125-009-1365-0
44. Steil GM, Palerm CC, Kurtz N, et al. The effect of insulin feedback on closed loop glucose control. *J Clin Endocrinol Metab* 2011;96(5):1402-8. doi: 10.1210/jc.2010-2578
45. Grosman B, Ilany J, Roy A, et al. Hybrid Closed-Loop Insulin Delivery in Type 1 Diabetes During Supervised Outpatient Conditions. *J Diabetes Sci Technol* 2016;10(3):708-13. doi: 10.1177/1932296816631568
46. Bergenstal RM, Garg S, Weinzimer SA, et al. Safety of a Hybrid Closed-Loop Insulin Delivery System in Patients With Type 1 Diabetes. *JAMA* 2016;316(13):1407-08. doi: 10.1001/jama.2016.11708
47. Garg SK, Weinzimer SA, Tamborlane WV, et al. Glucose Outcomes with the In-Home Use of a Hybrid Closed-Loop Insulin Delivery System in Adolescents and Adults with Type 1 Diabetes. *Diabetes Technol Ther* 2017;19(3):155-63. doi: 10.1089/dia.2016.0421
48. Christiansen MP, Garg SK, Brazg R, et al. Accuracy of a Fourth-Generation Subcutaneous Continuous Glucose Sensor. *Diabetes Technol Ther* 2017;19(8):446-56. doi: 10.1089/dia.2017.0087
49. Schulz KF, Grimes DA. Multiplicity in randomised trials I: endpoints and treatments. *Lancet* 2005;365(9470):1591-5. doi: 10.1016/S0140-6736(05)66461-6

## FIGURE LEGEND

Figure 1: Study protocol overview

1  
2  
3  
4  
5  
6  
7  
8  
9  
10  
11  
12  
13  
14  
15  
16  
17  
18  
19  
20  
21  
22  
23  
24  
25  
26  
27  
28  
29  
30  
31  
32  
33  
34  
35  
36  
37  
38  
39  
40  
41  
42  
43  
44  
45  
46  
47  
48  
49  
50  
51  
52  
53  
54  
55  
56  
57  
58  
59  
60

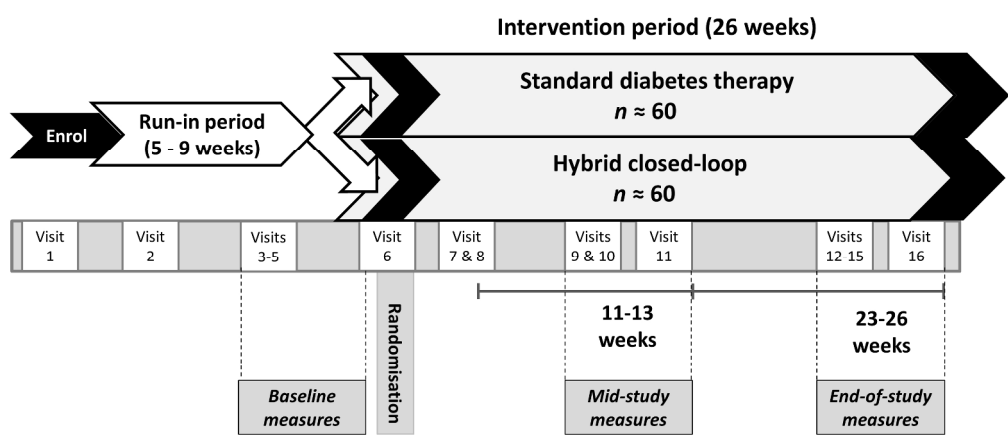

Figure 1: Study protocol overview

254x190mm (300 x 300 DPI)

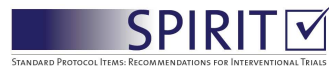

SPIRIT 2013 Checklist: Recommended items to address in a clinical trial protocol and related documents\*

| Section/item                      | Item No | Description                                                                                                                                                                                                                                                                              | Addressed on page number |
|-----------------------------------|---------|------------------------------------------------------------------------------------------------------------------------------------------------------------------------------------------------------------------------------------------------------------------------------------------|--------------------------|
| <b>Administrative information</b> |         |                                                                                                                                                                                                                                                                                          |                          |
| Title                             | 1       | Descriptive title identifying the study design, population, interventions, and, if applicable, trial acronym                                                                                                                                                                             | ___1___                  |
| Trial registration                | 2a      | Trial identifier and registry name. If not yet registered, name of intended registry                                                                                                                                                                                                     | ___3___                  |
|                                   | 2b      | All items from the World Health Organization Trial Registration Data Set                                                                                                                                                                                                                 | ___1–23___               |
| Protocol version                  | 3       | Date and version identifier                                                                                                                                                                                                                                                              | ___7___                  |
| Funding                           | 4       | Sources and types of financial, material, and other support                                                                                                                                                                                                                              | ___1___                  |
| Roles and responsibilities        | 5a      | Names, affiliations, and roles of protocol contributors                                                                                                                                                                                                                                  | ___2___                  |
|                                   | 5b      | Name and contact information for the trial sponsor                                                                                                                                                                                                                                       | ___2 and 7___            |
|                                   | 5c      | Role of study sponsor and funders, if any, in study design; collection, management, analysis, and interpretation of data; writing of the report; and the decision to submit the report for publication, including whether they will have ultimate authority over any of these activities | ___20___                 |
|                                   | 5d      | Composition, roles, and responsibilities of the coordinating centre, steering committee, endpoint adjudication committee, data management team, and other individuals or groups overseeing the trial, if applicable (see Item 21a for data monitoring committee)                         | ___19___                 |

1  
2  
3  
4  
5  
6  
7  
8  
9  
10  
11  
12  
13  
14  
15  
16  
17  
18  
19  
20  
21  
22  
23  
24  
25  
26  
27  
28  
29  
30  
31  
32  
33  
34  
35  
36  
37  
38  
39  
40  
41  
42  
43  
44  
45  
46  
47

**Introduction**

|                          |    |                                                                                                                                                                                                           |     |
|--------------------------|----|-----------------------------------------------------------------------------------------------------------------------------------------------------------------------------------------------------------|-----|
| Background and rationale | 6a | Description of research question and justification for undertaking the trial, including summary of relevant studies (published and unpublished) examining benefits and harms for each intervention        | 5–7 |
|                          | 6b | Explanation for choice of comparators                                                                                                                                                                     | 7   |
| Objectives               | 7  | Specific objectives or hypotheses                                                                                                                                                                         | 7   |
| Trial design             | 8  | Description of trial design including type of trial (eg, parallel group, crossover, factorial, single group), allocation ratio, and framework (eg, superiority, equivalence, noninferiority, exploratory) | 7   |

**Methods: Participants, interventions, and outcomes**

|                      |     |                                                                                                                                                                                                                                                                                                                                                                                |          |
|----------------------|-----|--------------------------------------------------------------------------------------------------------------------------------------------------------------------------------------------------------------------------------------------------------------------------------------------------------------------------------------------------------------------------------|----------|
| Study setting        | 9   | Description of study settings (eg, community clinic, academic hospital) and list of countries where data will be collected. Reference to where list of study sites can be obtained                                                                                                                                                                                             | 7–8      |
| Eligibility criteria | 10  | Inclusion and exclusion criteria for participants. If applicable, eligibility criteria for study centres and individuals who will perform the interventions (eg, surgeons, psychotherapists)                                                                                                                                                                                   | 7 and 11 |
| Interventions        | 11a | Interventions for each group with sufficient detail to allow replication, including how and when they will be administered                                                                                                                                                                                                                                                     | 15–17    |
|                      | 11b | Criteria for discontinuing or modifying allocated interventions for a given trial participant (eg, drug dose change in response to harms, participant request, or improving/worsening disease)                                                                                                                                                                                 | 19       |
|                      | 11c | Strategies to improve adherence to intervention protocols, and any procedures for monitoring adherence (eg, drug tablet return, laboratory tests)                                                                                                                                                                                                                              | 14       |
|                      | 11d | Relevant concomitant care and interventions that are permitted or prohibited during the trial                                                                                                                                                                                                                                                                                  | 7 and 11 |
| Outcomes             | 12  | Primary, secondary, and other outcomes, including the specific measurement variable (eg, systolic blood pressure), analysis metric (eg, change from baseline, final value, time to event), method of aggregation (eg, median, proportion), and time point for each outcome. Explanation of the clinical relevance of chosen efficacy and harm outcomes is strongly recommended | 8–10     |
| Participant timeline | 13  | Time schedule of enrolment, interventions (including any run-ins and washouts), assessments, and visits for participants. A schematic diagram is highly recommended (see Figure)                                                                                                                                                                                               | 15       |

|   |             |    |                                                                                                                                                                                       |                 |
|---|-------------|----|---------------------------------------------------------------------------------------------------------------------------------------------------------------------------------------|-----------------|
| 1 |             |    |                                                                                                                                                                                       |                 |
| 2 |             |    |                                                                                                                                                                                       |                 |
| 3 | Sample size | 14 | Estimated number of participants needed to achieve study objectives and how it was determined, including clinical and statistical assumptions supporting any sample size calculations | _____14_____    |
| 4 |             |    |                                                                                                                                                                                       |                 |
| 5 | Recruitment | 15 | Strategies for achieving adequate participant enrolment to reach target sample size                                                                                                   | _____13–14_____ |
| 6 |             |    |                                                                                                                                                                                       |                 |
| 7 |             |    |                                                                                                                                                                                       |                 |

### 8 **Methods: Assignment of interventions (for controlled trials)**

#### 9 Allocation:

|    |                                  |     |                                                                                                                                                                                                                                                                                                                                                          |               |
|----|----------------------------------|-----|----------------------------------------------------------------------------------------------------------------------------------------------------------------------------------------------------------------------------------------------------------------------------------------------------------------------------------------------------------|---------------|
| 10 |                                  |     |                                                                                                                                                                                                                                                                                                                                                          |               |
| 11 |                                  |     |                                                                                                                                                                                                                                                                                                                                                          |               |
| 12 | Sequence generation              | 16a | Method of generating the allocation sequence (eg, computer-generated random numbers), and list of any factors for stratification. To reduce predictability of a random sequence, details of any planned restriction (eg, blocking) should be provided in a separate document that is unavailable to those who enrol participants or assign interventions | _____16_____  |
| 13 |                                  |     |                                                                                                                                                                                                                                                                                                                                                          |               |
| 14 |                                  |     |                                                                                                                                                                                                                                                                                                                                                          |               |
| 15 |                                  |     |                                                                                                                                                                                                                                                                                                                                                          |               |
| 16 |                                  |     |                                                                                                                                                                                                                                                                                                                                                          |               |
| 17 | Allocation concealment mechanism | 16b | Mechanism of implementing the allocation sequence (eg, central telephone; sequentially numbered, opaque, sealed envelopes), describing any steps to conceal the sequence until interventions are assigned                                                                                                                                                | _____16_____  |
| 18 |                                  |     |                                                                                                                                                                                                                                                                                                                                                          |               |
| 19 |                                  |     |                                                                                                                                                                                                                                                                                                                                                          |               |
| 20 |                                  |     |                                                                                                                                                                                                                                                                                                                                                          |               |
| 21 | Implementation                   | 16c | Who will generate the allocation sequence, who will enrol participants, and who will assign participants to interventions                                                                                                                                                                                                                                | _____16_____  |
| 22 |                                  |     |                                                                                                                                                                                                                                                                                                                                                          |               |
| 23 |                                  |     |                                                                                                                                                                                                                                                                                                                                                          |               |
| 24 | Blinding (masking)               | 17a | Who will be blinded after assignment to interventions (eg, trial participants, care providers, outcome assessors, data analysts), and how                                                                                                                                                                                                                | _____16_____  |
| 25 |                                  |     |                                                                                                                                                                                                                                                                                                                                                          |               |
| 26 |                                  |     |                                                                                                                                                                                                                                                                                                                                                          |               |
| 27 |                                  | 17b | If blinded, circumstances under which unblinding is permissible, and procedure for revealing a participant's allocated intervention during the trial                                                                                                                                                                                                     | _____N/A_____ |
| 28 |                                  |     |                                                                                                                                                                                                                                                                                                                                                          |               |
| 29 |                                  |     |                                                                                                                                                                                                                                                                                                                                                          |               |
| 30 |                                  |     |                                                                                                                                                                                                                                                                                                                                                          |               |

### 31 **Methods: Data collection, management, and analysis**

|    |                         |     |                                                                                                                                                                                                                                                                                                                                                                                                              |                 |
|----|-------------------------|-----|--------------------------------------------------------------------------------------------------------------------------------------------------------------------------------------------------------------------------------------------------------------------------------------------------------------------------------------------------------------------------------------------------------------|-----------------|
| 32 |                         |     |                                                                                                                                                                                                                                                                                                                                                                                                              |                 |
| 33 | Data collection methods | 18a | Plans for assessment and collection of outcome, baseline, and other trial data, including any related processes to promote data quality (eg, duplicate measurements, training of assessors) and a description of study instruments (eg, questionnaires, laboratory tests) along with their reliability and validity, if known. Reference to where data collection forms can be found, if not in the protocol | _____16_____    |
| 34 |                         |     |                                                                                                                                                                                                                                                                                                                                                                                                              |                 |
| 35 |                         |     |                                                                                                                                                                                                                                                                                                                                                                                                              |                 |
| 36 |                         |     |                                                                                                                                                                                                                                                                                                                                                                                                              |                 |
| 37 |                         |     |                                                                                                                                                                                                                                                                                                                                                                                                              |                 |
| 38 |                         | 18b | Plans to promote participant retention and complete follow-up, including list of any outcome data to be collected for participants who discontinue or deviate from intervention protocols                                                                                                                                                                                                                    | _____17–18_____ |
| 39 |                         |     |                                                                                                                                                                                                                                                                                                                                                                                                              |                 |
| 40 |                         |     |                                                                                                                                                                                                                                                                                                                                                                                                              |                 |
| 41 |                         |     |                                                                                                                                                                                                                                                                                                                                                                                                              |                 |
| 42 |                         |     |                                                                                                                                                                                                                                                                                                                                                                                                              |                 |
| 43 |                         |     |                                                                                                                                                                                                                                                                                                                                                                                                              |                 |
| 44 |                         |     |                                                                                                                                                                                                                                                                                                                                                                                                              |                 |
| 45 |                         |     |                                                                                                                                                                                                                                                                                                                                                                                                              |                 |
| 46 |                         |     |                                                                                                                                                                                                                                                                                                                                                                                                              |                 |
| 47 |                         |     |                                                                                                                                                                                                                                                                                                                                                                                                              |                 |



1  
2  
3  
4  
5  
6  
7  
8  
9  
10  
11  
12  
13  
14  
15  
16  
17  
18  
19  
20  
21  
22  
23  
24  
25  
26  
27  
28  
29  
30  
31  
32  
33  
34  
35  
36  
37  
38  
39  
40  
41  
42  
43  
44  
45  
46  
47

Data management 19 Plans for data entry, coding, security, and storage, including any related processes to promote data quality (eg, double data entry; range checks for data values). Reference to where details of data management procedures can be found, if not in the protocol \_\_\_\_\_19\_\_\_\_\_

Statistical methods 20a Statistical methods for analysing primary and secondary outcomes. Reference to where other details of the statistical analysis plan can be found, if not in the protocol \_\_\_\_\_17–18\_\_\_\_\_

20b Methods for any additional analyses (eg, subgroup and adjusted analyses) \_\_\_\_\_18\_\_\_\_\_

20c Definition of analysis population relating to protocol non-adherence (eg, as randomised analysis), and any statistical methods to handle missing data (eg, multiple imputation) \_\_\_\_\_18\_\_\_\_\_

**Methods: Monitoring**

Data monitoring 21a Composition of data monitoring committee (DMC); summary of its role and reporting structure; statement of whether it is independent from the sponsor and competing interests; and reference to where further details about its charter can be found, if not in the protocol. Alternatively, an explanation of why a DMC is not needed \_\_\_\_\_19\_\_\_\_\_

21b Description of any interim analyses and stopping guidelines, including who will have access to these interim results and make the final decision to terminate the trial \_\_\_\_\_18\_\_\_\_\_

Harms 22 Plans for collecting, assessing, reporting, and managing solicited and spontaneously reported adverse events and other unintended effects of trial interventions or trial conduct \_\_\_\_\_19\_\_\_\_\_

Auditing 23 Frequency and procedures for auditing trial conduct, if any, and whether the process will be independent from investigators and the sponsor \_\_\_\_\_19\_\_\_\_\_

**Ethics and dissemination**

Research ethics approval 24 Plans for seeking research ethics committee/institutional review board (REC/IRB) approval \_\_\_\_\_19\_\_\_\_\_

Protocol amendments 25 Plans for communicating important protocol modifications (eg, changes to eligibility criteria, outcomes, analyses) to relevant parties (eg, investigators, REC/IRBs, trial participants, trial registries, journals, regulators) \_\_\_\_\_19\_\_\_\_\_

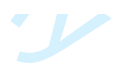

|    |                               |     |                                                                                                                                                                                                                                                                                     |                |
|----|-------------------------------|-----|-------------------------------------------------------------------------------------------------------------------------------------------------------------------------------------------------------------------------------------------------------------------------------------|----------------|
| 1  |                               |     |                                                                                                                                                                                                                                                                                     |                |
| 2  |                               |     |                                                                                                                                                                                                                                                                                     |                |
| 3  | Consent or assent             | 26a | Who will obtain informed consent or assent from potential trial participants or authorised surrogates, and how (see Item 32)                                                                                                                                                        | ___19___       |
| 4  |                               |     |                                                                                                                                                                                                                                                                                     |                |
| 5  |                               |     |                                                                                                                                                                                                                                                                                     |                |
| 6  |                               | 26b | Additional consent provisions for collection and use of participant data and biological specimens in ancillary studies, if applicable                                                                                                                                               | ___N/A___      |
| 7  |                               |     |                                                                                                                                                                                                                                                                                     |                |
| 8  | Confidentiality               | 27  | How personal information about potential and enrolled participants will be collected, shared, and maintained in order to protect confidentiality before, during, and after the trial                                                                                                | ___19___       |
| 9  |                               |     |                                                                                                                                                                                                                                                                                     |                |
| 10 |                               |     |                                                                                                                                                                                                                                                                                     |                |
| 11 | Declaration of interests      | 28  | Financial and other competing interests for principal investigators for the overall trial and each study site                                                                                                                                                                       | ___20___       |
| 12 |                               |     |                                                                                                                                                                                                                                                                                     |                |
| 13 |                               |     |                                                                                                                                                                                                                                                                                     |                |
| 14 | Access to data                | 29  | Statement of who will have access to the final trial dataset, and disclosure of contractual agreements that limit such access for investigators                                                                                                                                     | ___19___       |
| 15 |                               |     |                                                                                                                                                                                                                                                                                     |                |
| 16 |                               |     |                                                                                                                                                                                                                                                                                     |                |
| 17 | Ancillary and post-trial care | 30  | Provisions, if any, for ancillary and post-trial care, and for compensation to those who suffer harm from trial participation                                                                                                                                                       | ___N/A___      |
| 18 |                               |     |                                                                                                                                                                                                                                                                                     |                |
| 19 |                               |     |                                                                                                                                                                                                                                                                                     |                |
| 20 | Dissemination policy          | 31a | Plans for investigators and sponsor to communicate trial results to participants, healthcare professionals, the public, and other relevant groups (eg, via publication, reporting in results databases, or other data sharing arrangements), including any publication restrictions | ___20___       |
| 21 |                               |     |                                                                                                                                                                                                                                                                                     |                |
| 22 |                               |     |                                                                                                                                                                                                                                                                                     |                |
| 23 |                               |     |                                                                                                                                                                                                                                                                                     |                |
| 24 |                               |     |                                                                                                                                                                                                                                                                                     |                |
| 25 |                               | 31b | Authorship eligibility guidelines and any intended use of professional writers                                                                                                                                                                                                      | ___20___       |
| 26 |                               |     |                                                                                                                                                                                                                                                                                     |                |
| 27 |                               | 31c | Plans, if any, for granting public access to the full protocol, participant-level dataset, and statistical code                                                                                                                                                                     | ___N/A___      |
| 28 |                               |     |                                                                                                                                                                                                                                                                                     |                |
| 29 | <b>Appendices</b>             |     |                                                                                                                                                                                                                                                                                     |                |
| 30 |                               |     |                                                                                                                                                                                                                                                                                     |                |
| 31 | Informed consent materials    | 32  | Model consent form and other related documentation given to participants and authorised surrogates                                                                                                                                                                                  | ___Appendix___ |
| 32 |                               |     |                                                                                                                                                                                                                                                                                     |                |
| 33 |                               |     |                                                                                                                                                                                                                                                                                     |                |
| 34 | Biological specimens          | 33  | Plans for collection, laboratory evaluation, and storage of biological specimens for genetic or molecular analysis in the current trial and for future use in ancillary studies, if applicable                                                                                      | ___N/A___      |
| 35 |                               |     |                                                                                                                                                                                                                                                                                     |                |
| 36 |                               |     |                                                                                                                                                                                                                                                                                     |                |

37 \*It is strongly recommended that this checklist be read in conjunction with the SPIRIT 2013 Explanation & Elaboration for important clarification on the items.  
 38 Amendments to the protocol should be tracked and dated. The SPIRIT checklist is copyrighted by the SPIRIT Group under the Creative Commons  
 39 "[Attribution-NonCommercial-NoDerivs 3.0 Unported](https://creativecommons.org/licenses/by-nc-nd/3.0/)" license.  
 40

# BMJ Open

## The effect of 6 months hybrid closed-loop insulin delivery in adults with type 1 diabetes: a randomised controlled trial protocol

|                               |                                                                                                                                                                                                                                                                                                                                                                                                                                                                                                                                                                                                                                                                                                                                                                                                                                                                                                                                                                                                                                                                                                                                                                                                                                                                                                                                                                                                                                                                                                                                                                                                                                                                                                                                                                                                                                                                                                                                                                                                                                                                                                                                                                                                                                                                                                                                                                             |
|-------------------------------|-----------------------------------------------------------------------------------------------------------------------------------------------------------------------------------------------------------------------------------------------------------------------------------------------------------------------------------------------------------------------------------------------------------------------------------------------------------------------------------------------------------------------------------------------------------------------------------------------------------------------------------------------------------------------------------------------------------------------------------------------------------------------------------------------------------------------------------------------------------------------------------------------------------------------------------------------------------------------------------------------------------------------------------------------------------------------------------------------------------------------------------------------------------------------------------------------------------------------------------------------------------------------------------------------------------------------------------------------------------------------------------------------------------------------------------------------------------------------------------------------------------------------------------------------------------------------------------------------------------------------------------------------------------------------------------------------------------------------------------------------------------------------------------------------------------------------------------------------------------------------------------------------------------------------------------------------------------------------------------------------------------------------------------------------------------------------------------------------------------------------------------------------------------------------------------------------------------------------------------------------------------------------------------------------------------------------------------------------------------------------------|
| Journal:                      | <i>BMJ Open</i>                                                                                                                                                                                                                                                                                                                                                                                                                                                                                                                                                                                                                                                                                                                                                                                                                                                                                                                                                                                                                                                                                                                                                                                                                                                                                                                                                                                                                                                                                                                                                                                                                                                                                                                                                                                                                                                                                                                                                                                                                                                                                                                                                                                                                                                                                                                                                             |
| Manuscript ID                 | bmjopen-2017-020274.R2                                                                                                                                                                                                                                                                                                                                                                                                                                                                                                                                                                                                                                                                                                                                                                                                                                                                                                                                                                                                                                                                                                                                                                                                                                                                                                                                                                                                                                                                                                                                                                                                                                                                                                                                                                                                                                                                                                                                                                                                                                                                                                                                                                                                                                                                                                                                                      |
| Article Type:                 | Protocol                                                                                                                                                                                                                                                                                                                                                                                                                                                                                                                                                                                                                                                                                                                                                                                                                                                                                                                                                                                                                                                                                                                                                                                                                                                                                                                                                                                                                                                                                                                                                                                                                                                                                                                                                                                                                                                                                                                                                                                                                                                                                                                                                                                                                                                                                                                                                                    |
| Date Submitted by the Author: | 13-Apr-2018                                                                                                                                                                                                                                                                                                                                                                                                                                                                                                                                                                                                                                                                                                                                                                                                                                                                                                                                                                                                                                                                                                                                                                                                                                                                                                                                                                                                                                                                                                                                                                                                                                                                                                                                                                                                                                                                                                                                                                                                                                                                                                                                                                                                                                                                                                                                                                 |
| Complete List of Authors:     | <p>McAuley, Sybil; University of Melbourne, Department of Medicine; St Vincent's Hospital Melbourne, Department of Endocrinology and Diabetes<br/> de Bock, Martin; Princess Margaret Hospital for Children, Department of Endocrinology and Diabetes; University of Western Australia, Telethon Kids Institute<br/> Sundararajan, Vijaya; University of Melbourne, Department of Medicine<br/> Lee, Melissa; University of Melbourne, Department of Medicine; St Vincent's Hospital Melbourne, Department of Endocrinology and Diabetes<br/> Paldus, Barbora; University of Melbourne, Department of Medicine<br/> Ambler, Geoff; The Children's Hospital at Westmead, Institute of Endocrinology and Diabetes<br/> Bach, Leon; Alfred Hospital, Department of Endocrinology and Diabetes; Monash University, Department of Medicine (Alfred)<br/> Burt, Morton; Flinders Medical Centre, Southern Adelaide Diabetes and Endocrine Services; Flinders University, School of Medicine<br/> Cameron, Fergus; Murdoch Children's Research Institute, Department of Paediatrics<br/> Clarke, Philip; University of Melbourne, Melbourne School of Population and Global Health<br/> Cohen, Neale; Baker Heart and Diabetes Institute<br/> Colman, Peter; Royal Melbourne Hospital, Department of Endocrinology and Diabetes<br/> Davis, Elizabeth; Princess Margaret Hospital for Children, Department of Endocrinology and Diabetes; University of Western Australia, Telethon Kids Institute<br/> Fairchild, Jan; Endocrinology and Diabetes Centre, Women's and Children's Hospital<br/> Hendrieckx, Christel; Deakin University, School of Psychology; The Australian Centre for Behavioural Research in Diabetes<br/> Holmes-Walker, Deborah; Westmead Hospital, Department of Endocrinology and Diabetes; University of Sydney, Sydney Medical School<br/> Horsburgh, Jodie; St Vincent's Hospital Melbourne, Department of Endocrinology and Diabetes<br/> Jenkins, Alicia; University of Melbourne, Department of Medicine; St Vincent's Hospital Melbourne, Department of Endocrinology and Diabetes<br/> Kaye, Joey; Sir Charles Gairdner Hospital, Department of Endocrinology and Diabetes<br/> Keech, Anthony; University of Sydney, NHMRC Clinical Trials Centre<br/> King, Bruce; John Hunter Children's Hospital, Department of Endocrinology and Diabetes</p> |

|                                    |                                                                                                                                                                                                                                                                                                                                                                                                                                                                                                                                                                                                                                                                                                                                                                                                                                                                                                                                                                                                                                                                                                                                                                                                                                                                                                                                                                                                                                                                                         |
|------------------------------------|-----------------------------------------------------------------------------------------------------------------------------------------------------------------------------------------------------------------------------------------------------------------------------------------------------------------------------------------------------------------------------------------------------------------------------------------------------------------------------------------------------------------------------------------------------------------------------------------------------------------------------------------------------------------------------------------------------------------------------------------------------------------------------------------------------------------------------------------------------------------------------------------------------------------------------------------------------------------------------------------------------------------------------------------------------------------------------------------------------------------------------------------------------------------------------------------------------------------------------------------------------------------------------------------------------------------------------------------------------------------------------------------------------------------------------------------------------------------------------------------|
|                                    | <p>Kumareswaran, Kavita; Alfred Hospital, Department of Endocrinology and Diabetes; Baker Heart and Diabetes Institute</p> <p>MacIsaac, Richard J.; University of Melbourne, Department of Medicine; St Vincent's Hospital Melbourne, Department of Endocrinology and Diabetes</p> <p>McCallum, Roland; Royal Hobart Hospital, Department of Endocrinology and Diabetes</p> <p>Nicholas, Jennifer; Princess Margaret Hospital for Children, Department of Endocrinology and Diabetes; University of Western Australia, Telethon Kids Institute</p> <p>Sims, Catriona; University of Melbourne, Department of Medicine</p> <p>Speight, Jane; Deakin University, School of Psychology; The Australian Centre for Behavioural Research in Diabetes</p> <p>Stranks, Stephen; Flinders Medical Centre, Southern Adelaide Diabetes and Endocrine Services; Flinders University, School of Medicine</p> <p>Trawley, Steven; Cairnmillar Institute</p> <p>Ward, Glenn; St Vincent's Hospital Melbourne, Department of Endocrinology and Diabetes; University of Melbourne, Department of Pathology</p> <p>Vogrin, Sara; University of Melbourne, Department of Medicine</p> <p>Jones, Timothy; Princess Margaret Hospital for Children, Department of Endocrinology and Diabetes; University of Western Australia, Telethon Kids Institute</p> <p>O'Neal, David; University of Melbourne, Department of Medicine; St Vincent's Hospital Melbourne, Department of Endocrinology and Diabetes</p> |
| <b>Primary Subject Heading</b> :   | Diabetes and endocrinology                                                                                                                                                                                                                                                                                                                                                                                                                                                                                                                                                                                                                                                                                                                                                                                                                                                                                                                                                                                                                                                                                                                                                                                                                                                                                                                                                                                                                                                              |
| <b>Secondary Subject Heading</b> : | Medical management, Patient-centred medicine, Pharmacology and therapeutics, Research methods                                                                                                                                                                                                                                                                                                                                                                                                                                                                                                                                                                                                                                                                                                                                                                                                                                                                                                                                                                                                                                                                                                                                                                                                                                                                                                                                                                                           |
| <b>Keywords</b> :                  | Type 1 diabetes, Closed loop, Adult                                                                                                                                                                                                                                                                                                                                                                                                                                                                                                                                                                                                                                                                                                                                                                                                                                                                                                                                                                                                                                                                                                                                                                                                                                                                                                                                                                                                                                                     |
|                                    |                                                                                                                                                                                                                                                                                                                                                                                                                                                                                                                                                                                                                                                                                                                                                                                                                                                                                                                                                                                                                                                                                                                                                                                                                                                                                                                                                                                                                                                                                         |

SCHOLARONE™  
Manuscripts

## **The effect of 6 months hybrid closed-loop insulin delivery in adults with type 1 diabetes: a randomised controlled trial protocol**

Sybil A McAuley<sup>1,2</sup>, Martin I de Bock<sup>3,4,5</sup>, Vijaya Sundararajan<sup>1</sup>, Melissa H Lee<sup>1,2</sup>, Barbora Paldus<sup>1</sup>, Geoffrey R Ambler<sup>21</sup>, Leon A Bach<sup>6,7</sup>, Morton G Burt<sup>8,9</sup>, Fergus J Cameron<sup>22,23</sup>, Philip M Clarke<sup>20</sup>, Neale D Cohen<sup>10</sup>, Peter G Colman<sup>11</sup>, Elizabeth A Davis<sup>3,4,5</sup>, Jan M Fairchild<sup>24</sup>, Christel Hendrieckx<sup>17,18</sup>, D Jane Holmes-Walker<sup>12,13</sup>, Jodie C Horsburgh<sup>2</sup>, Alicia J Jenkins<sup>1,2,14</sup>, Joey Kaye<sup>15</sup>, Anthony C Keech<sup>14</sup>, Bruce R King<sup>25</sup>, Kavita Kumareswaran<sup>6,10</sup>, Richard J MacIsaac<sup>1,2</sup>, Roland W McCallum<sup>16</sup>, Jennifer A Nicholas<sup>3,4</sup>, Catriona Sims<sup>1</sup>, Jane Speight<sup>17,18</sup>, Stephen N Stranks<sup>8,9</sup>, Steven Trawley<sup>26</sup>, Glenn M Ward<sup>2,19</sup>, Sara Vogrin<sup>1</sup>, Timothy W Jones<sup>3,4,5</sup>, David N O'Neal<sup>1,2</sup>

1. Department of Medicine, University of Melbourne, Melbourne, Australia
2. Department of Endocrinology and Diabetes, St Vincent's Hospital Melbourne, Melbourne, Australia
3. Department of Endocrinology and Diabetes, Princess Margaret Hospital for Children, Perth, Australia
4. Telethon Kids Institute, University of Western Australia, Perth, Australia
5. School of Paediatrics and Child Health, University of Western Australia, Perth, Australia
6. Department of Endocrinology and Diabetes, Alfred Hospital, Melbourne, Australia
7. Department of Medicine (Alfred), Monash University, Melbourne, Australia
8. Southern Adelaide Diabetes and Endocrine Services, Flinders Medical Centre, Adelaide, Australia
9. School of Medicine, Flinders University, Adelaide, Australia
10. Baker Heart and Diabetes Institute, Melbourne, Australia
11. Department of Diabetes and Endocrinology, Royal Melbourne Hospital, Melbourne, Australia
12. Department of Diabetes and Endocrinology, Westmead Hospital, Sydney, Australia
13. Sydney Medical School, University of Sydney, Sydney, Australia
14. NHMRC Clinical Trials Centre, University of Sydney, Sydney, Australia
15. Department of Endocrinology and Diabetes, Sir Charles Gairdner Hospital, Perth, Australia
16. Department of Diabetes and Endocrinology, Royal Hobart Hospital, Hobart, Australia
17. School of Psychology, Deakin University, Geelong, Australia
18. Australian Centre for Behavioural Research in Diabetes, Melbourne, Australia

19. Department of Pathology, St Vincent's Hospital Melbourne, Melbourne, Australia
20. Melbourne School of Population and Global Health, University of Melbourne, Melbourne, Australia
21. Institute of Endocrinology and Diabetes, The Children's Hospital at Westmead, Sydney, Australia
22. Department of Endocrinology and Diabetes and Centre for Hormone Research, Royal Children's Hospital
23. Murdoch Children's Research Institute, Department of Paediatrics, University of Melbourne, Melbourne, Australia
24. Endocrinology and Diabetes Centre, Women's and Children's Hospital, Adelaide, Australia
25. Department of Endocrinology and Diabetes, John Hunter Children's Hospital, Newcastle, Australia
26. Cairnmillar Institute, Melbourne, Australia

**Correspondence to**

Professor David O'Neal

Department of Medicine, University of Melbourne, St Vincent's Hospital Melbourne

PO Box 2900, Fitzroy VIC 3065, Australia

Email: [dno@unimelb.edu.au](mailto:dno@unimelb.edu.au)

Telephone: +61 3 9231 2211

**Word count:** 4,184 words

## ABSTRACT

### Introduction

Manual determination of insulin dosing largely fails to optimise glucose control in type 1 diabetes. Automated insulin delivery via closed-loop systems has improved glucose control in short-term studies. The objective of the present study is to determine the effectiveness of 6 months closed-loop compared with manually-determined insulin dosing on time-in-target glucose range in adults with type 1 diabetes.

### Methods and analysis

This open-label, seven-centre, randomised controlled parallel group clinical trial will compare home-based hybrid closed-loop versus standard diabetes therapy in Australia. Adults aged  $\geq 25$  years with type 1 diabetes using intensive insulin therapy (via multiple daily injections or insulin pump, total enrolment target  $n=120$ ) will undertake a run-in period including diabetes and carbohydrate-counting education, clinical optimisation and baseline data collection. Participants will then be randomised 1:1 either to 26 weeks of MiniMed™ 670G hybrid closed-loop system therapy (Medtronic, Northridge, CA, USA) or continuation of their current diabetes therapy. The hybrid closed-loop system delivers insulin automatically to address basal requirements and correct to target glucose level, while bolus doses for meals require user initiation and carbohydrate estimation. Analysis will be intention-to-treat, with the primary outcome time in continuous glucose monitoring (CGM) target range (3.9–10.0 mmol/L) during the final 3 weeks of intervention. Secondary outcomes include: other CGM parameters, HbA<sub>1c</sub>, severe hypoglycaemia, psychosocial well-being, sleep, cognition, electrocardiography, costs, quality of life, biomarkers of vascular health and hybrid closed-loop system performance. Semi-structured interviews will assess the expectations and experiences of a sub-group of hybrid closed-loop users.

### Ethics and dissemination

The study has Human Research Ethics Committee approval. The study will be conducted in accordance with the principles of the Declaration of Helsinki and Good Clinical Practice. Results will be disseminated at scientific conferences and via peer-reviewed publications.

### Trial registration number

ACTRN12617000520336, pre-results

### Strengths and limitations of the study

- Multi-centre, randomised controlled parallel group trial of 26 weeks home-based hybrid closed-loop versus standard therapy
- Broad outcomes will be assessed in addition to glucose control: psychosocial, sleep, cognition, electrocardiography, vascular health biomarkers and health economic measures
- The standard therapy comparator—multiple daily insulin injections or insulin pump therapy, without real-time continuous glucose monitoring—reflects current practice in Australia for most adults with type 1 diabetes, though this may not reflect standard care in other countries
- The study emphasises education and clinical optimisation for all participants pre-randomisation, and the visit schedule is identical for both groups (by design, continuous glucose monitoring information is only available to the closed-loop group)
- This study of adults aged  $\geq 25$  years has glucose end-points aligned with a concurrent study examining hybrid closed-loop for young people aged 12 to  $< 25$  years, thereby facilitating comparison of metabolic outcomes between the two populations



## INTRODUCTION

Advances in type 1 diabetes insulin regimens and glucose monitoring have occurred over recent decades, facilitating improved glucose control and resulting in better health and quality of life.<sup>1-4</sup> The long-term vascular complications of type 1 diabetes are reduced by intensive insulin therapy compared with less intensive therapy.<sup>1 2</sup> Consequently, intensive insulin therapy—with subcutaneous administration via either multiple daily injections (MDI) or insulin pump therapy (IPT)—is a core strategy in current type 1 diabetes management.<sup>5</sup> Nevertheless, even with modern therapies, only 20–30% of adults with type 1 diabetes achieve HbA<sub>1c</sub> targets<sup>6 7</sup>, and long-term vascular complications and reduced life expectancy continue to be a reality for people with type 1 diabetes.<sup>8 9</sup>

Insulin requirements can vary unpredictably. They are impacted by time of day, meals, exercise, illness and antecedent hypoglycaemia. Manual determination of insulin dosing by people with type 1 diabetes requires continuous vigilance to maintain glucose levels within a healthy range. Insulin dosing decisions carry cognitive and emotional burden, and may be inconsistent due to fatigue, distress, fluctuating glucose levels or coexistent fear of hypoglycaemia. Hence, manual determination of insulin dosing represents an imperfect strategy to optimise glucose control. Further advances in technology are required to improve the match of insulin delivered to individuals' varying insulin requirements, and to minimise the burden of type 1 diabetes.

Closed-loop systems are designed to maintain glucose levels at a predetermined target by linking continuous glucose monitoring (CGM) information with an insulin dosing algorithm for automated subcutaneous insulin delivery by a pump.<sup>10</sup> These systems are being developed to address the need for improving glucose control while reducing the burden associated with treatment regimens. There is increasing scientific literature of randomised controlled studies reporting improved glucose control with short-term use of closed-loop systems (up to 3 months) compared with conventional insulin pumps.<sup>11-15</sup> A recent meta-analysis of outpatient randomised controlled trials with intervention periods ranging from 4 days to 12 weeks reported that single-hormone (insulin alone) closed-loop systems improve time-in-target glucose range and reduce time spent in hypoglycaemia compared with conventional IPT (with/without CGM).<sup>16</sup> Overall, time-in-target glucose range had a mean (95% confidence interval) absolute increase of 11.1% (6.9, 15.2), and the time spent in hypoglycaemia had an absolute reduction of 1.9% (0.4, 3.4). Studies in this meta-analysis used 'hybrid closed-loop' systems with automated insulin delivery to address basal requirements and correct to target

1  
2  
3 glucose, and user-initiated bolus insulin to address carbohydrate consumption. Results from a  
4 short-term randomised crossover study challenging a closed-loop system with both moderate-  
5 and high-intensity exercise indicated that closed-loop glucose control was safe; only a single  
6 episode of mild hypoglycaemia occurred and marked hyperglycaemic excursions were  
7 limited.<sup>17</sup> In an uncontrolled study, there were no safety concerns when 14 participants used  
8 free-living closed-loop 24/7 for 6 months.<sup>18</sup>

9  
10  
11  
12  
13 For individuals with type 1 diabetes, both hypoglycaemia and hyperglycaemia can affect  
14 physical and emotional well-being, quality of life, and activities of daily living such as  
15 driving.<sup>4 19-21</sup> Moreover, type 1 diabetes places significant burden on caregivers, families,  
16 workplaces and health services.<sup>22-24</sup> Closed-loop technology has shown promise to address  
17 the limitations of current therapy in relation to these burdens.<sup>25</sup> Qualitative and small-scale  
18 quantitative sub-studies in closed-loop trials have shown user acceptability and treatment  
19 satisfaction are high with closed-loop systems in home settings, particularly for overnight use  
20 when there is minimal manual interaction for meals and activity.<sup>26-28</sup> Although intrusive  
21 device alerts, device size and technical difficulties can negatively affect the overall  
22 experience, users typically report benefits outweighing annoyances, which they anticipate  
23 will be overcome with future iterations of the technology.<sup>27-29</sup> However, the only published  
24 randomised closed-loop trial involving adults to have included established, validated  
25 psychological measures, reported no between-group differences in treatment satisfaction or  
26 fear of hypoglycaemia.<sup>30</sup>

27  
28  
29  
30  
31  
32  
33  
34  
35  
36 HbA<sub>1c</sub>, a measurement of average glycaemia during the preceding 10–12 weeks, predicts the  
37 risk of developing long-term complications and is valuable for assessing glycaemic trends in  
38 populations over time.<sup>1 2 31</sup> However, HbA<sub>1c</sub> cannot provide information about glucose  
39 variability or time-in-target glucose range, and is even considered an unreliable indicator of  
40 an individual's mean glucose.<sup>32</sup> A recent large longitudinal registry study reported lower  
41 cardiovascular and all-cause mortality in individuals using IPT compared with MDI, even  
42 without between-group differences in HbA<sub>1c</sub>.<sup>33</sup> The mortality difference observed may have  
43 been attributable to factors such as time-in-target glucose range or glucose variability (not  
44 reflected in HbA<sub>1c</sub>). Consequently, HbA<sub>1c</sub> may be of limited value in comparison with CGM  
45 when assessing an individual's glucose levels in response to automated closed-loop insulin  
46 delivery.

47  
48  
49  
50  
51  
52  
53  
54  
55  
56  
57  
58  
59  
60  
With short-term randomised controlled studies of closed-loop systems (conducted in  
camp/hotel and home settings) demonstrating improvements in glucose control,<sup>16</sup> it remains

1  
2  
3 to be determined whether these findings are sustained in the longer term in the home setting  
4 and whether diabetes-related vascular complications may be influenced. Longer-term  
5 randomised controlled home-based studies—with closed-loop implemented day and night—  
6 are required. In addition, the impact of closed-loop insulin delivery on patient-reported  
7 outcomes such as fear of hypoglycaemia, treatment satisfaction, sleep quality and cognition  
8 remains a significant gap in the evidence base.<sup>34</sup> Finally, the benefits associated with this new  
9 technology need to be balanced against its cost.

10  
11  
12  
13  
14 In Australia, the government presently subsidises the purchase of insulin, injection needles,  
15 blood glucose monitoring strips and insulin pump delivery consumables for people with type  
16 1 diabetes.<sup>35</sup> Insulin pumps are not government-subsidised, but are available via either direct  
17 purchase or in conjunction with a private health insurance fund. CGM is government-  
18 subsidised only for eligible individuals under 21 years of age.<sup>36</sup> As a result, only a small  
19 fraction of adults with type 1 diabetes use CGM on a regular basis. Hence, standard diabetes  
20 therapy for adults in Australia currently involves subcutaneous intensive insulin therapy  
21 delivered via either MDI or pump, together with finger-prick blood glucose monitoring.

22  
23  
24  
25  
26  
27  
28 We hypothesise that hybrid closed-loop insulin delivery compared with manually-determined  
29 insulin dosing (without CGM) will improve time-in-target glucose range for adults with type  
30 1 diabetes. The overall aim of the study is to evaluate the effect of 6 months of hybrid closed-  
31 loop insulin delivery on glucose control, psychosocial well-being, sleep quality, cognition  
32 and markers of vascular disease risk compared with standard diabetes therapy for adults with  
33 type 1 diabetes.

## 34 35 36 37 38 **METHODS AND ANALYSIS**

### 39 40 41 **Overview**

42 This open-label, randomised controlled parallel group clinical trial will compare 26 weeks of  
43 hybrid closed-loop therapy versus ‘standard therapy’ for 120 adults (aged  $\geq 25$  years) with  
44 type 1 diabetes (protocol version 2.0, dated 29 March 2017). The standard therapy  
45 comparator consists of insulin delivered via either MDI or IPT, without real-time continuous  
46 glucose monitoring (RT-CGM), and was chosen to reflect current self-management of type 1  
47 diabetes among adults in Australia.

48  
49  
50  
51  
52  
53 The study is being conducted at seven university hospitals across Australia. The University of  
54 Melbourne is the coordinating academic institution, with St Vincent’s Hospital Melbourne  
55 (Melbourne) the study sponsor and lead clinical site. Other clinical sites are: Flinders Medical  
56  
57  
58  
59  
60

Centre (Adelaide), Royal Hobart Hospital (Hobart), Royal Melbourne Hospital (Melbourne), Sir Charles Gairdner Hospital (Perth), The Alfred and Baker Heart and Diabetes Institute (Melbourne) and Westmead Hospital (Sydney). Other academic institutions involved are Sydney University and Deakin University. In parallel, a similar study of younger people (aged 12 to <25 years) with type 1 diabetes is being undertaken in Australia; the hybrid closed-loop system and primary outcome are aligned for the two studies.

### Study outcomes

The study outcomes are listed in Table 1.

**Table 1: Study outcomes**

#### *Primary outcome*

The proportion of time sensor glucose is in target range (3.9–10.0 mmol/L) with hybrid closed-loop versus standard therapy (MDI or IPT without RT-CGM), measured by masked CGM at 23–26 weeks post-randomisation.

#### *Secondary outcomes*

Hybrid closed-loop therapy versus standard therapy (overall and for each of baseline MDI and IPT separately) for the measures listed below.

1. Glucose control:
  - a. Masked CGM metrics for 24 h/day, day [06:00–00:00] and night [00:00–06:00] (measured at mid-study, end-of-study, and mid-study plus end-of-study combined):
    - i. Proportion of time spent 3.9–10.0 mmol/L (excluding the primary outcome)
    - ii. Proportion of time spent <2.8 mmol/L
    - iii. Proportion of time spent <3.3 mmol/L
    - iv. Proportion of time spent <3.9 mmol/L
    - v. Proportion of time spent 3.9–7.8 mmol/L
    - vi. Proportion of time spent >10.0 mmol/L
    - vii. Proportion of time spent >13.9 mmol/L
    - viii. Proportion of time spent >16.7 mmol/L
    - ix. SD and coefficient of variation
    - x. Mean glucose
  - b. Fasting capillary blood glucose
  - c. HbA<sub>1c</sub>
  - d. 1,5-anhydroglucitol
  - e. Symptomatic hypoglycaemia (with blood glucose <3.5 mmol/L) requiring carbohydrate rescue (*n*)
2. Clinical:
  - a. Change in total daily dose of insulin, and basal/bolus proportions
  - b. Change in insulin-to-carbohydrate ratio
  - c. Change in body weight
3. Psychosocial, sleep and cognitive functioning:
  - a. Treatment satisfaction: The Diabetes Treatment Satisfaction Questionnaire (DTSQ) status

- and change versions
- b. Satisfaction with technology: Diabetes Management Experiences Questionnaire (DME-Q)
  - c. Fear of hypoglycaemia: Hypoglycaemia Fear Survey short form (HFS-SF)
  - d. Fear of hyperglycaemia: Hyperglycaemia Avoidance Scale (HAS)
  - e. Hypoglycaemia Awareness: Gold Score
  - f. Diabetes distress: Problem Areas in Diabetes (PAID)
  - g. Diabetes-specific quality of life: DAWN Impact of Diabetes profile (DIDP)
  - h. Diabetes-specific positive well-being: Well-being Questionnaire (W-BQ28) Positive Diabetes Well-being Subscale
  - i. Cognitive function: Prospective and Retrospective Memory Questionnaire (PRMQ) and Psychomotor Vigilance Task (PVT-192)
  - j. Driving: proportion of time-in-target glucose range while driving (Melbourne sites only)
  - k. Sleep quality: Actigraph data, Pittsburgh Sleep Quality Index, Karolinska Sleepiness Scale
4. Electrocardiograph profile (via Holter monitor)
- a. Corrected QT interval (QT<sub>c</sub>)
  - b. Heart rate
  - c. Cardiac arrhythmias
5. Human-technology interaction (participants using hybrid closed-loop system):
- a. Participant perceptions of the hybrid closed-loop system assessed via SMS data collection
  - b. Participant expectations and experiences with the hybrid closed-loop system assessed via longitudinal semi-structured interviews (Melbourne sites only)
6. Health economic:
- a. Quality-adjusted life years calculated from the EQ-5D-5L
  - b. Hypoglycaemic events and HbA<sub>1c</sub>
  - c. Participant and family reporting on work interruption
  - d. Reported time spent on training, education and support, by the type of health professional resource used
  - e. Diabetes management consumables (glucose strips, ketone strips, batteries, sensors, site dressings, lancets, needles, insulin)
  - f. Resource utilisation tracked via linked administrative data from the Australian Medicare Benefits Schedule and Pharmaceutical Benefits Scheme
7. Biochemical markers of vascular disease risk:
- a. Cell adhesion molecules
  - b. Oxidised low-density lipoprotein
  - c. Myeloperoxidase
  - d. MicroRNA signatures for arterial, renal and retinal complications
  - e. Telomerase
  - f. DNA methylation/acetylation
  - g. Isoprostanes (blood and urine) and proteomics
  - h. Clotting profile
8. Hybrid closed-loop system performance parameters:
- a. Proportion of time closed-loop active
  - b. Unplanned exits from closed-loop (*n*)
  - c. Sensor performance versus blood glucose meter as measured by MARD and sensor failures (*n*)
  - d. Reported insulin delivery line failures (*n*)
  - e. Participant calls to the technical help line (*n*)

9. Safety:

- a. Hospitalisations for diabetic ketoacidosis (*n*)
- b. Severe hypoglycaemia, defined as hypoglycaemia requiring the assistance of another person to actively administer carbohydrate, glucagon, or take other corrective actions (*n*)

The primary study outcome is the proportion of sensor glucose time-in-target range (3.9–10.0 mmol/L) with hybrid closed-loop versus standard therapy, measured by masked CGM 23–26 weeks post-randomisation. This primary end-point was selected to provide the best indication of individual participants' glucose control. The 3.9–10.0 mmol/L glucose range is aligned with outcome metrics proposed by the JDRF Artificial Pancreas Project Consortium, is consistent with available data relating glucose control and complication prevention, and represents a realistic glucose target.<sup>32 37</sup> The secondary outcomes are listed in Table 1 (row 2), sections 1 to 9.

CGM study outcome data will be collected by identical methods for participants in both groups. Hence, participants assigned hybrid closed-loop therapy will wear two identical glucose sensors for 2 weeks mid-study and 3 weeks at end-of-study—one sensor providing RT-CGM information to the user and directly linking to the hybrid closed-loop system, and a second sensor collecting masked CGM study outcome data. The closed-loop system performance parameters chosen as study outcome measures are based upon an international consensus report for outcomes measures in closed-loop trials.<sup>37</sup>

For closed-loop technology to achieve long-term clinical benefits, then in addition to positively impacting biomedical outcomes, user acceptance, uptake and adaptations are required.<sup>28 38</sup> Therefore, this study will assess aspects of psychosocial well-being via both subjective (questionnaires, interviews) and objective (actigraph, psychomotor task) methods. This holistic approach will progress understanding of the human factors involved, thereby enabling adaption of the technology in line with the person's expectations and experiences.<sup>39</sup> The study will also assess whether CGM has an impact on utilisation of health services and medications.

### Eligibility

Inclusion and exclusion criteria for participation are listed in Table 2.

**Table 2: Eligibility*****Inclusion criteria***

- Type 1 diabetes (as defined by the American Diabetes Association)<sup>40</sup> for at least 1 year
- Insulin regimen consisting of either:
  - MDI with  $\geq 4$  injections per day (including  $\geq 3$  rapid-acting insulin injections and  $\geq 1$  long-acting insulin injection); or
  - IPT established for  $\geq 3$  months
- Age 25–70 years inclusive
- HbA1c  $\leq 10.5\%$  ( $\leq 91$  mmol/mol)
- Living in an area with internet and cellular phone coverage
- English speaking proficiency

***Exclusion criteria***

- Chronic kidney disease (eGFR  $< 45$  mL/min/1.73m<sup>2</sup>)
- Current use of RT-CGM (defined as use  $> 25\%$  of the time during the past 3 months)
- Use of any non-insulin glucose-lowering agent within the past 3 months
- Oral or injected steroid use within the past 3 months
- Pregnancy, or pregnancy planned within study period
- Untreated coeliac disease or other malabsorption
- Uncontrolled thyroid disease
- Clinically-significant gastroparesis
- Uncontrolled hypertension (blood pressure: diastolic  $> 100$  or systolic  $> 160$  mmHg)
- History of myocardial infarction, severe uncontrolled heart failure, unstable angina, transient ischaemic attack, stroke, or thromboembolic disease in the past 3 months
- Poor visual acuity precluding use of the study technology
- Inability or unwillingness to meet protocol requirements
- Any severe or unstable medical or psychological condition which, in the opinion of the investigator, would compromise the ability to meet protocol requirements

The minimum inclusion age of 25 years was chosen to reflect a general adult population with type 1 diabetes while avoiding potential confounders associated with adolescence and emerging adulthood. This decision was informed by results of previous type 1 diabetes CGM and closed-loop studies, where individuals aged  $< 25$  years differed from those aged  $\geq 25$  years.<sup>14 41</sup>

1  
2  
3 Use of RT-CGM >25% of the time precludes inclusion. This decision was informed by study  
4 findings that adults aged  $\geq 25$  years with type 1 diabetes using RT-CGM with warning alarms  
5 had improved glucose control without increase in biochemical hypoglycaemia only when RT-  
6 CGM was worn  $\geq 5$ –6 days/week.<sup>41–43</sup> When CGM is used less often or without warning  
7 alarms, evidence suggests no glucose control benefit.  
8  
9  
10

## 11 **Study diabetes management devices**

### 12 Hybrid closed-loop system

13  
14 The study hybrid closed-loop is the MiniMed™ 670G system, comprising a glucose sensor  
15 and transmitter coupled with an insulin pump containing a closed-loop algorithm (Medtronic,  
16 Northridge, CA, USA), and rapid-acting analogue insulin (either insulin aspart or insulin  
17 lispro) delivered subcutaneously. CGM data are transmitted to the pump every 5 minutes and  
18 the algorithm calculates the basal insulin dose (delivered at 5 min intervals) required to  
19 maintain the target glucose level. The algorithm uses a modified proportional integrative  
20 derivative model with insulin feedback based on an insulin delivery algorithm originally  
21 developed by Steil et al.<sup>44</sup> The algorithm also incorporates a supervisory model predictive  
22 component aiming to avoid insulin over-delivery.<sup>45</sup> For meals, the user estimates the amount  
23 of carbohydrate to be consumed (entering this into the pump) and checks their capillary blood  
24 glucose level. Using this information, an insulin bolus is calculated and delivered according  
25 to the individualised insulin-to-carbohydrate ratio and an insulin sensitivity factor determined  
26 by the algorithm (should a correction bolus be required).  
27  
28  
29  
30  
31  
32  
33  
34  
35

36 The MiniMed™ 670G system has been deemed safe and effective for glucose control in a 3-  
37 month uncontrolled study<sup>46 47</sup> and an exercise study.<sup>17</sup> The system was approved for use by  
38 the US Food and Drug Administration in 2016.  
39  
40  
41

### 42 Masked CGM

43  
44 CGM data masked to both the participants and research team will be collected for study  
45 outcome measurements at three time-points: baseline pre-randomisation (3 weeks), mid-study  
46 (2 weeks) and end-of-study (3 weeks). For participants randomised to hybrid closed-loop, this  
47 masked CGM data collection will be in addition to the system's RT-CGM. The study uses  
48 Guardian™ Sensor 3 glucose sensors (Medtronic, Northridge, CA, USA). This sensor  
49 configuration has reported performance parameters of mean absolute relative difference  
50 (MARD)  $\pm$  standard deviation (SD) of  $9.6\% \pm 9.0\%$  and mean functional sensor life of  $146 \pm$   
51  $39$  h when used with a Medtronic MiniMed™ 640G insulin pump.<sup>48</sup> By using a separate  
52  
53  
54  
55  
56  
57  
58  
59  
60



1  
2  
3 device to collect CGM study outcome data, the device under investigation is not also being  
4 used to evaluate its own performance.  
5

6  
7 For masked CGM data collection, the glucose sensor will be inserted and the sensor recorder  
8 will be connected by the study team. During masked CGM, participants will be required to  
9 test capillary blood glucose levels at least 4 times per day with a CONTOUR<sup>®</sup> NEXT LINK  
10 meter (details below). Masked CGM data are collected retrospectively by uploading the  
11 recorder and the meter.  
12  
13

#### 14 15 Blood glucose monitoring

16 All participants will be provided with a CONTOUR<sup>®</sup> NEXT LINK 2.4 blood glucose meter  
17 (Ascensia, Parsippany, NJ, USA) which is able to transmit data directly to the MiniMed<sup>™</sup>  
18 670G insulin pump. Pre-randomisation and for participants randomised to standard therapy,  
19 the CONTOUR<sup>®</sup> NEXT LINK 2.4 will be used in addition to their regular glucose meter  
20 during masked CGM. Use of the same glucose meter within the hybrid closed-loop system  
21 and for masked CGM calibration will standardise data collection.  
22  
23

24  
25  
26  
27 Participants using MDI at enrolment will also be provided with an ACCU-CHEK<sup>®</sup> Aviva  
28 Expert blood glucose meter (Roche Diagnostics, Mannheim, Germany), selected for its in-  
29 built 'bolus calculator'. The bolus calculator uses the measured blood glucose level,  
30 calculated rapid-acting 'insulin on board', and the programmed insulin sensitivity factor and  
31 insulin-to-carbohydrate ratio to determine the recommended insulin bolus doses. The use of a  
32 meter with bolus calculator by those in the control group who continue with MDI will reflect  
33 the bolus calculators used by participants randomised to hybrid closed-loop therapy and by  
34 those using IPT randomised to standard diabetes therapy.  
35  
36  
37  
38  
39

#### 40 Diabetes management software

41 CareLink<sup>™</sup>, an internet-based platform from Medtronic, will be used for uploading insulin  
42 pump, glucose sensor and glucose meter data. The hybrid closed-loop system data are  
43 uploaded to a computer via the system's glucose meter USB connection; insulin pump, sensor  
44 and meter data are then accessible to study investigators.  
45  
46  
47  
48

#### 49 **Study design**

50  
51 This is a prospective, open-label, parallel design randomised controlled study involving  
52 adults with type 1 diabetes (overall target  $n=120$ , with  $\geq 40\%$  using MDI and  $\geq 40\%$  using  
53 IPT). Study procedures will be undertaken by medical doctors with sub-speciality training in  
54 endocrinology, diabetes nurse educators, dieticians and research nurses. Throughout the  
55  
56  
57  
58  
59  
60

1  
2  
3 study, the time taken for participant education, training, clinical care and technical support  
4 will be recorded; the health professional time will be used in health economic analyses to  
5 determine implications for closed-loop becoming a mainstream therapy. Adherence to study  
6 protocols will be assessed at each study visit; verbal and written reminders of study  
7 instructions will be provided to improve protocol adherence. Participants will continue their  
8 usual diabetes clinical care with their treating clinicians during study participation.  
9 Participants will be randomised 1:1 either to hybrid closed-loop therapy or to continue using  
10 their current standard diabetes therapy (either MDI or IPT) for 26 weeks (Fig. 1). Use of RT-  
11 CGM will not be permitted during run-in or by participants randomised to standard diabetes  
12 therapy (though CGM without live alerts, e.g. Abbott FreeStyle<sup>®</sup> Libre, is permissible).  
13  
14  
15  
16  
17  
18

### 19 Patient involvement

20 Investigator discussions with patients throughout provision of clinical care and during  
21 previous research studies were taken into consideration when designing this study protocol.  
22 The burden of the study intervention will be assessed via SMS data collection and during  
23 semi-structured interviews (see Table 1, sections 5a and 5b).  
24  
25  
26  
27

### 28 Sample size

29 The power calculation is for a parallel study design with two groups of equal size. It is based  
30 on SDs of the percentage time-in-target glucose range at 6 months (adjusted for baseline)  
31 observed for the subset of participants in two randomised clinical trials from the JDRF Study  
32 Group who had similar characteristics to participants being recruited here (Professor Roy  
33 Beck, personal communication). The SD (95% confidence interval) for pump users was 9%  
34 (8%, 12%) and for MDI users was 10% (7%, 19%).  
35  
36  
37  
38  
39

40 From an initial overall sample size of  $n=120$ , with a dropout rate of 10%, a common SD of  
41 9% and a type I error rate of 5%, the power to detect a minimum absolute difference of 5%  
42 time-in-target glucose range would be 80%. A more conservative scenario with a dropout rate  
43 of 20%, and unequal SDs of 12% and 19% for pump and MDI users, respectively, increases  
44 the minimum detectable absolute difference to 9% with power of 80%.  
45  
46  
47  
48

### 49 Study schedule

50 The study will consist of 16 visits including the run-in and intervention periods. Key  
51 activities undertaken during each visit are shown in Table 3. Participants will be provided  
52 with 24-hour telephone contacts for support if required. Health professionals will log all time  
53 taken training and communicating with the study participants.  
54  
55  
56  
57  
58  
59  
60

**Table 3: Study visits**

| Study Visit                                        | 1 | 2 | 3  | 4  | 5  | 6 | 7 | 8  | 9  | 10 | 11 | 12 | 13 | 14 | 15 | 16 | 17 |
|----------------------------------------------------|---|---|----|----|----|---|---|----|----|----|----|----|----|----|----|----|----|
| Weeks from randomisation                           |   |   | -3 | -2 | -1 | 0 | 1 | ~7 | 11 | 12 | 13 | 23 | 24 | 25 | 26 | 26 | 39 |
| Clinical assessment                                | X |   |    |    |    | X |   |    |    |    | X  |    |    |    |    | X  |    |
| Time with health professional                      |   | X | X  | X  | X  | X | X | X  | X  | X  | X  | X  | X  | X  | X  | X  |    |
| HbA <sub>1c</sub>                                  | X |   |    |    |    | X |   |    |    |    | X  |    |    |    |    | X  |    |
| β-hCG, C-peptide                                   | X |   |    |    |    |   |   |    |    |    |    |    |    |    |    |    |    |
| CHO-counting education                             |   | X |    |    |    |   |   |    |    |    | X  |    |    |    |    |    |    |
| Insulin pump training                              |   |   |    |    |    |   | X |    |    |    |    |    |    |    |    |    |    |
| Insulin dose review                                |   | X |    |    |    |   |   | X  |    |    | X  |    |    |    |    | X  |    |
| Logbook provision                                  |   |   | X  |    |    |   |   |    |    |    |    |    |    |    |    |    |    |
| Logbook data collection                            |   |   |    | X  | X  | X | X | X  | X  | X  | X  | X  | X  | X  | X  | X  |    |
| Masked CGM insertion                               |   |   | X  | X  | X  |   |   |    | X  | X  |    | X  | X  | X  |    |    |    |
| Glucose meter upload                               |   |   |    | X  | X  | X | X | X  | X  | X  | X  | X  | X  | X  | X  | X  |    |
| Psychosocial, sleep, cognitive functioning surveys | X |   |    |    |    |   |   |    |    |    | X  |    |    |    |    | X  |    |
| Cognitive performance device provision             |   |   | X  |    |    |   |   |    | X  |    |    | X  |    |    |    |    |    |
| Actigraphy & sleep diary provision                 |   |   | X  | X  | X  |   |   |    | X  | X  |    | X  | X  | X  |    |    |    |
| Semi-structured interviews                         |   |   |    |    |    |   | X |    | X  |    |    |    |    |    |    | X  | X  |
| Driving device and diary provision                 |   |   | X  | X  | X  |   |   |    | X  | X  |    | X  | X  | X  |    |    |    |
| Holter monitor provision                           |   |   | X  |    |    |   |   |    | X  |    |    | X  |    |    |    |    |    |
| Vascular disease risk markers                      |   |   |    |    |    | X |   |    |    |    |    |    |    |    |    | X  |    |

### Run-in period

After enrolment, there will be a run-in period lasting at least 5 weeks. Participants will undergo initial medical, psychosocial and cognitive assessments. Their diabetes-related knowledge and carbohydrate-counting proficiency will be assessed and their insulin dosing

1  
2  
3 will be optimised. Participants will be provided with detailed training and support to use the  
4 study glucose meters and masked CGM devices. Education will be provided by diabetes  
5 nurse educators and dieticians to optimise participants' diabetes self-management including  
6 carbohydrate-counting. The optimisation of carbohydrate-counting is central to baseline  
7 optimisation for all participants in the study—this aims to achieve the best possible match of  
8 bolus insulin doses to the individuals' requirements for the carbohydrate consumed for both  
9 groups, thereby testing the closed-loop aspect of the hybrid closed-loop system's insulin  
10 delivery in comparison with standard therapy.  
11  
12  
13  
14  
15

16 After provision of education, data will be collected for 3 weeks of baseline masked CGM,  
17 actigraphy (sleep data) and from the self-reported diabetes logbook. Driving log data (to  
18 associate with the CGM data) will also be collected during these 3 weeks for participants at  
19 the three clinical sites in Melbourne. At the end of the run-in period, the CGM data will be  
20 uploaded and checked to ensure data are available for at least 70% of the time.<sup>41</sup> If the  
21 minimum required CGM data are not available, an additional week of CGM will be  
22 undertaken to fulfil the protocol requirements. At the end of the run-in, baseline blood and  
23 urine samples will be collected for measurement of HbA<sub>1c</sub> and biochemical markers of  
24 vascular disease risk.  
25  
26  
27  
28  
29  
30

### 31 Randomisation

32 Eligible participants will be randomised after completing the run-in. Group allocation will be  
33 a 1:1 ratio using minimisation with three variables, all of which are expected to be highly  
34 prognostic of the primary outcome. These minimisation variables are: i) the proportion of  
35 time-in-target glucose range at baseline (dichotomised to  $\leq 50\%$  and  $> 50\%$ ); ii) study centre  
36 (seven clinical sites); and iii) insulin delivery modality (MDI or IPT). Randomisation will be  
37 performed by an independent group of statisticians using central randomisation software, and  
38 will be implemented into an electronic participant record system.  
39  
40  
41  
42  
43  
44

45 The nature of the study groups does not allow blinding of participants or investigators.

### 46 Intervention period

47 After randomisation, there will be a 26-week intervention period.

48 Participants randomised to standard therapy will continue using their current insulin delivery  
49 modality (MDI or IPT, with bolus calculator in the glucose meter or pump, respectively) and  
50 will be instructed to refrain from using RT-CGM during the study.  
51  
52  
53  
54  
55  
56  
57  
58  
59  
60

1  
2  
3 Participants randomised to hybrid closed-loop therapy will receive general insulin pump and  
4 CGM education and training, plus instruction regarding usage of the study hybrid closed-loop  
5 system. This education and training period may take up to 4 weeks (likely longer for those  
6 using MDI than IPT at baseline). The hybrid closed-loop system will be programmed with  
7 participants' usual insulin-to-carbohydrate ratios and insulin sensitivity factors, as well as  
8 their usual basal rates (or the basal rates determined by their clinicians for those participants  
9 transitioning from MDI). Participants will be provided with a 24-hour technical help  
10 telephone contact for the hybrid closed-loop system.  
11  
12  
13  
14  
15

16 Participants at the three clinical sites in Melbourne who are randomised to hybrid closed-loop  
17 therapy will undergo four semi-structured interviews to assess their expectations of, and  
18 experiences with, the technology. These interviews will be conducted at randomisation, then  
19 at 11 weeks, 26 weeks and 39 weeks post-randomisation.  
20  
21  
22

23 Participants will have mid-study data collected between 11 weeks to 13 weeks post-  
24 randomisation. Two weeks of masked CGM data, cognitive assessments and actigraphy will  
25 be collected, plus driving data for participants at the Melbourne sites. Clinical review with  
26 assessment of diabetes management and carbohydrate-counting, and adjustment of therapy  
27 and further education as required, will be undertaken 13 weeks post-randomisation. At this  
28 visit, psychosocial questionnaires will be completed and venous samples for HbA<sub>1c</sub> will be  
29 collected.  
30  
31  
32  
33  
34

35 Participants will have end-of-study data collected between 23 to 26 weeks post-  
36 randomisation. Three weeks of masked CGM data, cognitive assessments and actigraphy will  
37 be collected, plus driving data for participants at the Melbourne sites. At the end of the three-  
38 week period, the CGM data will be uploaded and checked for available data at least 70% of  
39 the time. If 70% of CGM data are not available, an additional week of CGM data will be  
40 collected. At the end-of-study visit (26 weeks post-randomisation), psychosocial  
41 questionnaires will be completed, and venous and urine samples will be collected for HbA<sub>1c</sub>  
42 and biochemical markers of vascular disease risk. Participants in the hybrid closed-loop  
43 group will change back to using their usual insulin delivery modality (MDI or IPT). Doctor  
44 visit data from the Medicare Benefits Schedule and insulin prescription data from the  
45 Pharmaceutical Benefits Scheme will be accessed for study participants.  
46  
47  
48  
49  
50  
51  
52  
53  
54  
55  
56  
57  
58  
59  
60

### Statistical methods

The primary analysis will assess differences in the proportion of time-in-target glucose sensor range (3.9–10.0 mmol/L) with hybrid closed-loop versus standard therapy, measured by masked CGM at 23–26 weeks post-randomisation on an intention-to-treat basis using analysis of covariance (ANCOVA) with adjustment for baseline time-in-target range. A *p*-value threshold of <0.05 will be used to determine statistical significance.

Model fit will be evaluated by exploration of residuals. If the model is of poor fit, the outcome variable will be transformed and the model refitted and evaluated. If unsuccessful, nonparametric analysis will be performed.

Analysis of continuous secondary outcomes will also use ANCOVA with adjustment for baseline time-in-target range, whereas Poisson or negative binomial regression will be used for count outcomes and logistic regression will be used for binary outcomes. Subgroup analysis by baseline insulin delivery modality will be performed by inclusion of an interaction term in the regression modelling or by a stratified analysis when non-parametric methods are used.

No adjustment for multiplicity is planned. All results for primary and secondary outcomes will be reported.<sup>49</sup> No interim analysis is planned.

### Health economic evaluation

An economic evaluation will determine the incremental cost of home-based hybrid closed-loop versus standard diabetes therapy in Australia. This analysis will quantify costs directly associated with hybrid closed-loop and standard diabetes therapy plus other impacts on the health system (Table 1). Outcomes will be assessed in quality-adjusted life years for changes in health-related quality of life, and for the likely long-term impact of changes in glucose control on long-term outcomes using a type 1 diabetes simulation model.

### Safety assessments

Safety parameters to be assessed include severe hypoglycaemia, ketoacidosis, and unplanned hospitalisations directly related to the study (Table 1).

### Effectiveness assessments

Effectiveness parameters to be assessed include glucose control, clinical measures, psychosocial and cognitive functioning, human-technology interaction, health economic measures and biochemical markers of vascular disease risk (Table 1).

### **Closed-loop system performance parameters**

Closed-loop system performance parameters to be assessed relate to the system overall, to individual system components and to system usability (Table 1).

### **Trial oversight**

The study will be conducted in accordance with the principles of the Declaration of Helsinki and guidelines for Good Clinical Practice (GCP).

The day-to-day study management will be the responsibility of the investigators at each clinical site. The Principal Investigator and study project manager will maintain regular correspondence with all investigators and study coordinators. The Principal Investigator, with the sites' lead investigators, will assume responsibility for the progress of the study in accordance with agreed timelines and milestones with the study funders. A combined data safety and monitoring board (DSMB) will be established for this study and the aligned study, independent from the study investigators, comprising adult and paediatric physicians experienced in statistics and clinical trials. The study project manager will liaise with the study teams in all centres to establish procedures and ensure that the study is carried out according to the protocol and to standards of GCP, with robust systems for reporting adverse events. The study project manager will be responsible for the central preparations of data for presentation to the DSMB.

### **ETHICS AND DISSEMINATION**

The study has received ethics approval from the lead site Human Research Ethics Committee. Other clinical sites provide oversight through local governance committees. Any substantial amendments to the study protocol will be reported to the lead site ethics committee for approval prior to implementation, and updated on the trial registry, with the study investigators being advised in writing.

All potential participants will be provided with written and verbal information regarding the study, the procedures involved and all potential risks related to participating. A study investigator will obtain written informed consent from each participant prior to commencing study procedures. All personal information about potential and enrolled participants will be de-identified to protect confidentiality before, during and after the trial. Standard operating procedures for reporting all adverse events, device-related adverse events and severe adverse events will be in place. The Human Research Ethics Committees and the Therapeutic Goods

Administration of Australia will be informed of any serious adverse events and any unexpected device-related adverse events.

Screening and recruitment commenced in May 2017. It is anticipated that the study visits will be completed by May 2019. The results of the study will be disseminated at national and international conferences and by peer-reviewed publications. Participants will be provided with a summary of the study results by their site's lead investigator.

### **Acknowledgments**

We thank Professor Roman Hovorka and Professor Roy Beck for their expert advice regarding study design.

### **Contributors**

SAM, MIDB, PGC, AJJ, ACK, JS, GMW, TWJ and DNO designed the study. SAM and DNO drafted the manuscript. SAM, MIDB, VS, MHL, BP, GAR, LAB, MGB, FJC, PMC, NDC, PGC, EAD, JMF, CH, DJH, JCH, AJJ, JK, ACK, BRK, KK, RJM, RWM, JAN, CS, JS, SNS, ST, GMW, SV, TWJ and DNO contributed to the writing and/or critical review of the study protocol and reviewed this manuscript for intellectual content. DNO is the principal investigator and guarantor.

### **Funding**

This study is funded by the Australian Research Council (with the funding administered by JDRF Australia), and by the National Health and Medical Research Council of Australia. Material support is being provided via a grant from the Medtronic External Research Program. SAM is supported by a JDRF Early-Career Patient-Orientated Diabetes Research Award. MIDB was supported by a Raine Clinical Research Fellowship. AJJ is supported by an NHMRC Practitioner Fellowship. JS is supported by core funding to the Australian Centre for Behavioural Research in Diabetes provided by Diabetes Victoria and Deakin University.

The study funders and sponsor did not have any role in study design or contribution to this manuscript, and they will not be involved in collection, management, analysis or interpretation of the data. The study funders will not have any role in writing the study report or the decision to submit the report for publication.

### **Competing interests**

MIDB and NDC report receiving speaker honoraria from Medtronic. DJH reports receiving speaker and advisory board honoraria from Medtronic. RWM reports receiving conference



travel and accommodation support from Medtronic. JS reports that the ACBRD has received honoraria from Medtronic in relation to her speaking engagements and role in advisory boards. DNO reports receiving speaker honoraria and research grants from Medtronic.

### Ethics approval

St Vincent's Hospital Melbourne Human Research Ethics Committee (lead site, approval number HREC-D 088/16).

### REFERENCES

1. DCCT Research Group. The effect of intensive treatment of diabetes on the development and progression of long-term complications in insulin-dependent diabetes mellitus. *N Engl J Med* 1993;329(14):977-86. [published Online First: 1993/09/30]
2. Nathan DM, Cleary PA, Backlund JY, et al. Intensive diabetes treatment and cardiovascular disease in patients with type 1 diabetes. *N Engl J Med* 2005;353(25):2643-53. doi: 10.1056/NEJMoa052187
3. Nathan DM, DCCT/EDIC Research Group. The diabetes control and complications trial/epidemiology of diabetes interventions and complications study at 30 years: overview. *Diabetes Care* 2014;37(1):9-16. doi: 10.2337/dc13-2112
4. Rubin RR, Peyrot M. Quality of life and diabetes. *Diabetes Metab Res Rev* 1999;15(3):205-18.
5. American Diabetes Association. *Pharmacologic approaches to glycemic treatment. Sec. 8. In Standards of Medical Care in Diabetes—2017. Diabetes Care* 2017;40(Suppl 1):S64-S74. doi: 10.2337/dc17-S011
6. Beck RW, Tamborlane WV, Bergenstal RM, et al. The T1D Exchange clinic registry. *J Clin Endocrinol Metab* 2012;97(12):4383-9. doi: 10.1210/jc.2012-1561
7. McKnight JA, Wild SH, Lamb MJ, et al. Glycaemic control of Type 1 diabetes in clinical practice early in the 21st century: an international comparison. *Diabet Med* 2015;32(8):1036-50. doi: 10.1111/dme.12676
8. Huo L, Harding JL, Peeters A, et al. Life expectancy of type 1 diabetic patients during 1997-2010: a national Australian registry-based cohort study. *Diabetologia* 2016;59(6):1177-85. doi: 10.1007/s00125-015-3857-4
9. Huo L, Shaw JE, Wong E, et al. Burden of diabetes in Australia: life expectancy and disability-free life expectancy in adults with diabetes. *Diabetologia* 2016;59(7):1437-45. doi: 10.1007/s00125-016-3948-x
10. Thabit H, Hovorka R. Coming of age: the artificial pancreas for type 1 diabetes. *Diabetologia* 2016;59(9):1795-805. doi: 10.1007/s00125-016-4022-4
11. Leelarathna L, Dellweg S, Mader JK, et al. Day and night home closed-loop insulin delivery in adults with type 1 diabetes: three-center randomized crossover study. *Diabetes Care* 2014;37(7):1931-7. doi: 10.2337/dc13-2911
12. Nimri R, Muller I, Atlas E, et al. MD-Logic overnight control for 6 weeks of home use in patients with type 1 diabetes: randomized crossover trial. *Diabetes Care* 2014;37(11):3025-32. doi: 10.2337/dc14-0835
13. Thabit H, Tauschmann M, Allen JM, et al. Home Use of an Artificial Beta Cell in Type 1 Diabetes. *N Engl J Med* 2015;373(22):2129-40. doi: 10.1056/NEJMoa1509351
14. Sharifi A, De Bock MI, Jayawardene D, et al. Glycemia, Treatment Satisfaction, Cognition, and Sleep Quality in Adults and Adolescents with Type 1 Diabetes When Using a Closed-Loop System Overnight Versus Sensor-Augmented Pump with Low-Glucose Suspend Function: A Randomized Crossover Study. *Diabetes Technol Ther* 2016;18(12):772-83. doi: 10.1089/dia.2016.0288
15. Bally L, Thabit H, Kojzar H, et al. Day-and-night glycaemic control with closed-loop insulin delivery versus conventional insulin pump therapy in free-living adults with well controlled

- 1  
2  
3 type 1 diabetes: an open-label, randomised, crossover study. *Lancet Diabetes Endocrinol*  
4 2017;5(4):261-70. doi: 10.1016/S2213-8587(17)30001-3 [published Online First: 2017/01/18]
- 5 16. Weisman A, Bai JW, Cardinez M, et al. Effect of artificial pancreas systems on glycaemic control  
6 in patients with type 1 diabetes: a systematic review and meta-analysis of outpatient  
7 randomised controlled trials. *Lancet Diabetes Endocrinol* 2017 doi: 10.1016/S2213-  
8 8587(17)30167-5
- 9 17. Jayawardene DC, McAuley SA, Horsburgh JC, et al. Closed-Loop Insulin Delivery for Adults  
10 with Type 1 Diabetes Undertaking High-Intensity Interval Exercise Versus Moderate-  
11 Intensity Exercise: A Randomized, Crossover Study. *Diabetes Technol Ther* 2017;19(6):340-  
12 48. doi: 10.1089/dia.2016.0461
- 13 18. Kovatchev B, Cheng P, Anderson SM, et al. Feasibility of Long-Term Closed-Loop Control: A  
14 Multicenter 6-Month Trial of 24/7 Automated Insulin Delivery. *Diabetes Technol Ther*  
15 2017;19(1):18-24. doi: 10.1089/dia.2016.0333 [published Online First: 2016/12/17]
- 16 19. Cox DJ, Kovatchev BP, Anderson SM, et al. Type 1 diabetic drivers with and without a history of  
17 recurrent hypoglycemia-related driving mishaps: physiological and performance differences  
18 during euglycemia and the induction of hypoglycemia. *Diabetes Care* 2010;33(11):2430-5.  
19 doi: 10.2337/dc09-2130
- 20 20. Chiang JL, Kirkman MS, Laffel LM, et al. Type 1 diabetes through the life span: a position  
21 statement of the American Diabetes Association. *Diabetes Care* 2014;37(7):2034-54. doi:  
22 10.2337/dc14-1140
- 23 21. Hendrieckx C, Halliday JA, Bowden JP, et al. Severe hypoglycaemia and its association with  
24 psychological well-being in Australian adults with type 1 diabetes attending specialist tertiary  
25 clinics. *Diabetes Res Clin Pract* 2014;103(3):430-6. doi: 10.1016/j.diabres.2013.12.005
- 26 22. Goss J. Projection of Australian health care expenditure by disease, 2003 to 2033. Cat. no. HWE  
27 43. Canberra: AIHW., 2008.
- 28 23. Colagiuri S, Brnabic A, Gomez M, et al. DiabCoSt Australia Type 1: Assessing the burden of  
29 Type 1 Diabetes in Australia: Diabetes Australia, Canberra., 2009.
- 30 24. Tao B, Pietropaolo M, Atkinson M, et al. Estimating the cost of type 1 diabetes in the U.S.: a  
31 propensity score matching method. *PLoS One* 2010;5(7):e11501. doi:  
32 10.1371/journal.pone.0011501
- 33 25. Barnard KD, Hood KK, Weissberg-Benchell J, et al. Psychosocial assessment of artificial  
34 pancreas (AP): commentary and review of existing measures and their applicability in AP  
35 research. *Diabetes Technol Ther* 2015;17(4):295-300. doi: 10.1089/dia.2014.0305
- 36 26. Barnard KD, Wysocki T, Allen JM, et al. Closing the loop overnight at home setting: psychosocial  
37 impact for adolescents with type 1 diabetes and their parents. *BMJ Open Diabetes Res Care*  
38 2014;2(1):e000025. doi: 10.1136/bmjdr-2014-000025 [published Online First: 2014/12/03]
- 39 27. Barnard KD, Wysocki T, Thabit H, et al. Psychosocial aspects of closed- and open-loop insulin  
40 delivery: closing the loop in adults with Type 1 diabetes in the home setting. *Diabet Med*  
41 2015;32(5):601-8. doi: 10.1111/dme.12706 [published Online First: 2015/01/24]
- 42 28. Hendrieckx C, Poole LA, Sharifi A, et al. "It Is Definitely a Game Changer": A Qualitative Study  
43 of Experiences with In-home Overnight Closed-Loop Technology Among Adults with Type 1  
44 Diabetes. *Diabetes Technol Ther* 2017;19(7):410-16. doi: 10.1089/dia.2017.0007
- 45 29. Barnard KD, Wysocki T, Ully V, et al. Closing the Loop in Adults, Children and Adolescents  
46 With Suboptimally Controlled Type 1 Diabetes Under Free Living Conditions: A  
47 Psychosocial Substudy. *J Diabetes Sci Technol* 2017;11(6):1080-88. doi:  
48 10.1177/1932296817702656 [published Online First: 2017/04/04]
- 49 30. Kropff J, DeJong J, Del Favero S, et al. Psychological outcomes of evening and night closed-loop  
50 insulin delivery under free living conditions in people with Type 1 diabetes: a 2-month  
51 randomized crossover trial. *Diabet Med* 2017;34(2):262-71. doi: 10.1111/dme.13268  
52 [published Online First: 2016/10/30]
- 53 31. DCCT Research Group. The relationship of glycemic exposure (HbA1c) to the risk of  
54 development and progression of retinopathy in the diabetes control and complications trial.  
55 *Diabetes* 1995;44(8):968-83.

32. Beck RW, Connor CG, Mullen DM, et al. The Fallacy of Average: How Using HbA1c Alone to Assess Glycemic Control Can Be Misleading. *Diabetes Care* 2017;40(8):994-99. doi: 10.2337/dc17-0636
33. Steineck I, Cederholm J, Eliasson B, et al. Insulin pump therapy, multiple daily injections, and cardiovascular mortality in 18,168 people with type 1 diabetes: observational study. *BMJ* 2015;350:h3234. doi: 10.1136/bmj.h3234
34. Barnard KD, Venkat MV, Close K, et al. PsychDT Working Group: Report Psychosocial Aspects of Artificial Pancreas Systems. *J Diabetes Sci Technol* 2015;9(4):925-8. doi: 10.1177/1932296815588332
35. National Diabetes Services Scheme. Product and supply 2017 [Available from: <https://www.ndss.com.au/product-and-supply> accessed 22 June 2017.
36. National Diabetes Services Scheme. Continuous Glucose Monitoring 2017 [Available from: <https://www.ndss.com.au/cgm> accessed 22 June 2017.
37. Maahs DM, Buckingham BA, Castle JR, et al. Outcome Measures for Artificial Pancreas Clinical Trials: A Consensus Report. *Diabetes Care* 2016;39(7):1175-9. doi: 10.2337/dc15-2716
38. Gonder-Frederick LA, Shepard JA, Grabman JH, et al. Psychology, technology, and diabetes management. *Am Psychol* 2016;71(7):577-89. doi: 10.1037/a0040383
39. Gonder-Frederick LA, Grabman JH, Shepard JA. Human Factor Considerations for Artificial Pancreas Research. *Diabetes Technol Ther* 2016;18(12):762-64. doi: 10.1089/dia.2016.0403
40. American Diabetes Association. Classification and Diagnosis of Diabetes Sec. 2. In Standards of Medical Care in Diabetes—2017. *Diabetes Care* 2017;40(Suppl 1):S11-S24. doi: 10.2337/dc17-S005
41. JDRF CGM Study Group. Continuous glucose monitoring and intensive treatment of type 1 diabetes. *N Engl J Med* 2008;359(14):1464-76. doi: 10.1056/NEJMoa0805017
42. JDRF CGM Study Group. The effect of continuous glucose monitoring in well-controlled type 1 diabetes. *Diabetes Care* 2009;32(8):1378-83. doi: 10.2337/dc09-0108
43. O'Connell MA, Donath S, O'Neal DN, et al. Glycaemic impact of patient-led use of sensor-guided pump therapy in type 1 diabetes: a randomised controlled trial. *Diabetologia* 2009;52(7):1250-7. doi: 10.1007/s00125-009-1365-0
44. Steil GM, Palerm CC, Kurtz N, et al. The effect of insulin feedback on closed loop glucose control. *J Clin Endocrinol Metab* 2011;96(5):1402-8. doi: 10.1210/jc.2010-2578
45. Grosman B, Ilany J, Roy A, et al. Hybrid Closed-Loop Insulin Delivery in Type 1 Diabetes During Supervised Outpatient Conditions. *J Diabetes Sci Technol* 2016;10(3):708-13. doi: 10.1177/1932296816631568
46. Bergenstal RM, Garg S, Weinzimer SA, et al. Safety of a Hybrid Closed-Loop Insulin Delivery System in Patients With Type 1 Diabetes. *JAMA* 2016;316(13):1407-08. doi: 10.1001/jama.2016.11708
47. Garg SK, Weinzimer SA, Tamborlane WV, et al. Glucose Outcomes with the In-Home Use of a Hybrid Closed-Loop Insulin Delivery System in Adolescents and Adults with Type 1 Diabetes. *Diabetes Technol Ther* 2017;19(3):155-63. doi: 10.1089/dia.2016.0421
48. Christiansen MP, Garg SK, Brazg R, et al. Accuracy of a Fourth-Generation Subcutaneous Continuous Glucose Sensor. *Diabetes Technol Ther* 2017;19(8):446-56. doi: 10.1089/dia.2017.0087
49. Schulz KF, Grimes DA. Multiplicity in randomised trials I: endpoints and treatments. *Lancet* 2005;365(9470):1591-5. doi: 10.1016/S0140-6736(05)66461-6

## FIGURE LEGEND

Figure 1: Study protocol overview

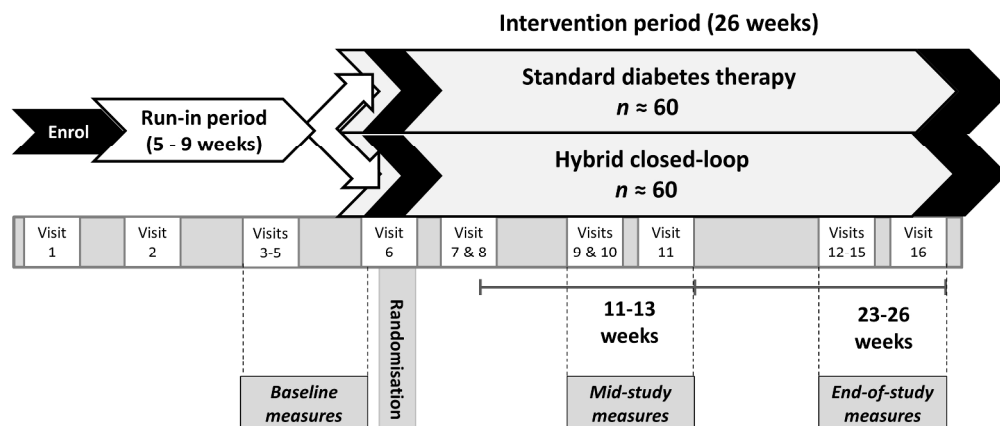

Figure 1: Study protocol overview

254x190mm (300 x 300 DPI)

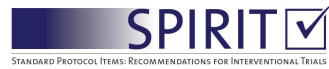

SPIRIT 2013 Checklist: Recommended items to address in a clinical trial protocol and related documents\*

| Section/item                      | Item No | Description                                                                                                                                                                                                                                                                              | Addressed on page number |
|-----------------------------------|---------|------------------------------------------------------------------------------------------------------------------------------------------------------------------------------------------------------------------------------------------------------------------------------------------|--------------------------|
| <b>Administrative information</b> |         |                                                                                                                                                                                                                                                                                          |                          |
| Title                             | 1       | Descriptive title identifying the study design, population, interventions, and, if applicable, trial acronym                                                                                                                                                                             | ___1___                  |
| Trial registration                | 2a      | Trial identifier and registry name. If not yet registered, name of intended registry                                                                                                                                                                                                     | ___3___                  |
|                                   | 2b      | All items from the World Health Organization Trial Registration Data Set                                                                                                                                                                                                                 | ___1–23___               |
| Protocol version                  | 3       | Date and version identifier                                                                                                                                                                                                                                                              | ___7___                  |
| Funding                           | 4       | Sources and types of financial, material, and other support                                                                                                                                                                                                                              | ___1___                  |
| Roles and responsibilities        | 5a      | Names, affiliations, and roles of protocol contributors                                                                                                                                                                                                                                  | ___2___                  |
|                                   | 5b      | Name and contact information for the trial sponsor                                                                                                                                                                                                                                       | ___2 and 7___            |
|                                   | 5c      | Role of study sponsor and funders, if any, in study design; collection, management, analysis, and interpretation of data; writing of the report; and the decision to submit the report for publication, including whether they will have ultimate authority over any of these activities | ___20___                 |
|                                   | 5d      | Composition, roles, and responsibilities of the coordinating centre, steering committee, endpoint adjudication committee, data management team, and other individuals or groups overseeing the trial, if applicable (see Item 21a for data monitoring committee)                         | ___19___                 |

1  
2  
3  
4  
5  
6  
7  
8  
9  
10  
11  
12  
13  
14  
15  
16  
17  
18  
19  
20  
21  
22  
23  
24  
25  
26  
27  
28  
29  
30  
31  
32  
33  
34  
35  
36  
37  
38  
39  
40  
41  
42  
43  
44  
45  
46  
47

**Introduction**

|                          |    |                                                                                                                                                                                                           |     |
|--------------------------|----|-----------------------------------------------------------------------------------------------------------------------------------------------------------------------------------------------------------|-----|
| Background and rationale | 6a | Description of research question and justification for undertaking the trial, including summary of relevant studies (published and unpublished) examining benefits and harms for each intervention        | 5–7 |
|                          | 6b | Explanation for choice of comparators                                                                                                                                                                     | 7   |
| Objectives               | 7  | Specific objectives or hypotheses                                                                                                                                                                         | 7   |
| Trial design             | 8  | Description of trial design including type of trial (eg, parallel group, crossover, factorial, single group), allocation ratio, and framework (eg, superiority, equivalence, noninferiority, exploratory) | 7   |

**Methods: Participants, interventions, and outcomes**

|                      |     |                                                                                                                                                                                                                                                                                                                                                                                |          |
|----------------------|-----|--------------------------------------------------------------------------------------------------------------------------------------------------------------------------------------------------------------------------------------------------------------------------------------------------------------------------------------------------------------------------------|----------|
| Study setting        | 9   | Description of study settings (eg, community clinic, academic hospital) and list of countries where data will be collected. Reference to where list of study sites can be obtained                                                                                                                                                                                             | 7–8      |
| Eligibility criteria | 10  | Inclusion and exclusion criteria for participants. If applicable, eligibility criteria for study centres and individuals who will perform the interventions (eg, surgeons, psychotherapists)                                                                                                                                                                                   | 7 and 11 |
| Interventions        | 11a | Interventions for each group with sufficient detail to allow replication, including how and when they will be administered                                                                                                                                                                                                                                                     | 15–17    |
|                      | 11b | Criteria for discontinuing or modifying allocated interventions for a given trial participant (eg, drug dose change in response to harms, participant request, or improving/worsening disease)                                                                                                                                                                                 | 19       |
|                      | 11c | Strategies to improve adherence to intervention protocols, and any procedures for monitoring adherence (eg, drug tablet return, laboratory tests)                                                                                                                                                                                                                              | 14       |
|                      | 11d | Relevant concomitant care and interventions that are permitted or prohibited during the trial                                                                                                                                                                                                                                                                                  | 7 and 11 |
| Outcomes             | 12  | Primary, secondary, and other outcomes, including the specific measurement variable (eg, systolic blood pressure), analysis metric (eg, change from baseline, final value, time to event), method of aggregation (eg, median, proportion), and time point for each outcome. Explanation of the clinical relevance of chosen efficacy and harm outcomes is strongly recommended | 8–10     |
| Participant timeline | 13  | Time schedule of enrolment, interventions (including any run-ins and washouts), assessments, and visits for participants. A schematic diagram is highly recommended (see Figure)                                                                                                                                                                                               | 15       |

|   |             |    |                                                                                                                                                                                       |                 |
|---|-------------|----|---------------------------------------------------------------------------------------------------------------------------------------------------------------------------------------|-----------------|
| 1 |             |    |                                                                                                                                                                                       |                 |
| 2 |             |    |                                                                                                                                                                                       |                 |
| 3 | Sample size | 14 | Estimated number of participants needed to achieve study objectives and how it was determined, including clinical and statistical assumptions supporting any sample size calculations | _____14_____    |
| 4 |             |    |                                                                                                                                                                                       |                 |
| 5 | Recruitment | 15 | Strategies for achieving adequate participant enrolment to reach target sample size                                                                                                   | _____13–14_____ |
| 6 |             |    |                                                                                                                                                                                       |                 |
| 7 |             |    |                                                                                                                                                                                       |                 |

### 8 **Methods: Assignment of interventions (for controlled trials)**

#### 9 Allocation:

|    |                                  |     |                                                                                                                                                                                                                                                                                                                                                          |               |
|----|----------------------------------|-----|----------------------------------------------------------------------------------------------------------------------------------------------------------------------------------------------------------------------------------------------------------------------------------------------------------------------------------------------------------|---------------|
| 10 |                                  |     |                                                                                                                                                                                                                                                                                                                                                          |               |
| 11 |                                  |     |                                                                                                                                                                                                                                                                                                                                                          |               |
| 12 | Sequence generation              | 16a | Method of generating the allocation sequence (eg, computer-generated random numbers), and list of any factors for stratification. To reduce predictability of a random sequence, details of any planned restriction (eg, blocking) should be provided in a separate document that is unavailable to those who enrol participants or assign interventions | _____16_____  |
| 13 |                                  |     |                                                                                                                                                                                                                                                                                                                                                          |               |
| 14 |                                  |     |                                                                                                                                                                                                                                                                                                                                                          |               |
| 15 |                                  |     |                                                                                                                                                                                                                                                                                                                                                          |               |
| 16 |                                  |     |                                                                                                                                                                                                                                                                                                                                                          |               |
| 17 | Allocation concealment mechanism | 16b | Mechanism of implementing the allocation sequence (eg, central telephone; sequentially numbered, opaque, sealed envelopes), describing any steps to conceal the sequence until interventions are assigned                                                                                                                                                | _____16_____  |
| 18 |                                  |     |                                                                                                                                                                                                                                                                                                                                                          |               |
| 19 |                                  |     |                                                                                                                                                                                                                                                                                                                                                          |               |
| 20 |                                  |     |                                                                                                                                                                                                                                                                                                                                                          |               |
| 21 | Implementation                   | 16c | Who will generate the allocation sequence, who will enrol participants, and who will assign participants to interventions                                                                                                                                                                                                                                | _____16_____  |
| 22 |                                  |     |                                                                                                                                                                                                                                                                                                                                                          |               |
| 23 |                                  |     |                                                                                                                                                                                                                                                                                                                                                          |               |
| 24 | Blinding (masking)               | 17a | Who will be blinded after assignment to interventions (eg, trial participants, care providers, outcome assessors, data analysts), and how                                                                                                                                                                                                                | _____16_____  |
| 25 |                                  |     |                                                                                                                                                                                                                                                                                                                                                          |               |
| 26 |                                  |     |                                                                                                                                                                                                                                                                                                                                                          |               |
| 27 |                                  | 17b | If blinded, circumstances under which unblinding is permissible, and procedure for revealing a participant's allocated intervention during the trial                                                                                                                                                                                                     | _____N/A_____ |
| 28 |                                  |     |                                                                                                                                                                                                                                                                                                                                                          |               |
| 29 |                                  |     |                                                                                                                                                                                                                                                                                                                                                          |               |
| 30 |                                  |     |                                                                                                                                                                                                                                                                                                                                                          |               |

### 31 **Methods: Data collection, management, and analysis**

|    |                         |     |                                                                                                                                                                                                                                                                                                                                                                                                              |                 |
|----|-------------------------|-----|--------------------------------------------------------------------------------------------------------------------------------------------------------------------------------------------------------------------------------------------------------------------------------------------------------------------------------------------------------------------------------------------------------------|-----------------|
| 32 |                         |     |                                                                                                                                                                                                                                                                                                                                                                                                              |                 |
| 33 | Data collection methods | 18a | Plans for assessment and collection of outcome, baseline, and other trial data, including any related processes to promote data quality (eg, duplicate measurements, training of assessors) and a description of study instruments (eg, questionnaires, laboratory tests) along with their reliability and validity, if known. Reference to where data collection forms can be found, if not in the protocol | _____16_____    |
| 34 |                         |     |                                                                                                                                                                                                                                                                                                                                                                                                              |                 |
| 35 |                         |     |                                                                                                                                                                                                                                                                                                                                                                                                              |                 |
| 36 |                         |     |                                                                                                                                                                                                                                                                                                                                                                                                              |                 |
| 37 |                         |     |                                                                                                                                                                                                                                                                                                                                                                                                              |                 |
| 38 |                         | 18b | Plans to promote participant retention and complete follow-up, including list of any outcome data to be collected for participants who discontinue or deviate from intervention protocols                                                                                                                                                                                                                    | _____17–18_____ |
| 39 |                         |     |                                                                                                                                                                                                                                                                                                                                                                                                              |                 |
| 40 |                         |     |                                                                                                                                                                                                                                                                                                                                                                                                              |                 |
| 41 |                         |     |                                                                                                                                                                                                                                                                                                                                                                                                              |                 |
| 42 |                         |     |                                                                                                                                                                                                                                                                                                                                                                                                              |                 |
| 43 |                         |     |                                                                                                                                                                                                                                                                                                                                                                                                              |                 |
| 44 |                         |     |                                                                                                                                                                                                                                                                                                                                                                                                              |                 |
| 45 |                         |     |                                                                                                                                                                                                                                                                                                                                                                                                              |                 |
| 46 |                         |     |                                                                                                                                                                                                                                                                                                                                                                                                              |                 |
| 47 |                         |     |                                                                                                                                                                                                                                                                                                                                                                                                              |                 |

1  
2  
3  
4  
5  
6  
7  
8  
9  
10  
11  
12  
13  
14  
15  
16  
17  
18  
19  
20  
21  
22  
23  
24  
25  
26  
27  
28  
29  
30  
31  
32  
33  
34  
35  
36  
37  
38  
39  
40  
41  
42  
43  
44  
45  
46  
47

|                 |    |                                                                                                                                                                                                                                                                   |          |
|-----------------|----|-------------------------------------------------------------------------------------------------------------------------------------------------------------------------------------------------------------------------------------------------------------------|----------|
| Data management | 19 | Plans for data entry, coding, security, and storage, including any related processes to promote data quality (eg, double data entry; range checks for data values). Reference to where details of data management procedures can be found, if not in the protocol | ___19___ |
|-----------------|----|-------------------------------------------------------------------------------------------------------------------------------------------------------------------------------------------------------------------------------------------------------------------|----------|

|                     |     |                                                                                                                                                                          |             |
|---------------------|-----|--------------------------------------------------------------------------------------------------------------------------------------------------------------------------|-------------|
| Statistical methods | 20a | Statistical methods for analysing primary and secondary outcomes. Reference to where other details of the statistical analysis plan can be found, if not in the protocol | ___17–18___ |
|---------------------|-----|--------------------------------------------------------------------------------------------------------------------------------------------------------------------------|-------------|

|  |     |                                                                          |          |
|--|-----|--------------------------------------------------------------------------|----------|
|  | 20b | Methods for any additional analyses (eg, subgroup and adjusted analyses) | ___18___ |
|--|-----|--------------------------------------------------------------------------|----------|

|  |     |                                                                                                                                                                                 |          |
|--|-----|---------------------------------------------------------------------------------------------------------------------------------------------------------------------------------|----------|
|  | 20c | Definition of analysis population relating to protocol non-adherence (eg, as randomised analysis), and any statistical methods to handle missing data (eg, multiple imputation) | ___18___ |
|--|-----|---------------------------------------------------------------------------------------------------------------------------------------------------------------------------------|----------|

**Methods: Monitoring**

|                 |     |                                                                                                                                                                                                                                                                                                                                       |          |
|-----------------|-----|---------------------------------------------------------------------------------------------------------------------------------------------------------------------------------------------------------------------------------------------------------------------------------------------------------------------------------------|----------|
| Data monitoring | 21a | Composition of data monitoring committee (DMC); summary of its role and reporting structure; statement of whether it is independent from the sponsor and competing interests; and reference to where further details about its charter can be found, if not in the protocol. Alternatively, an explanation of why a DMC is not needed | ___19___ |
|-----------------|-----|---------------------------------------------------------------------------------------------------------------------------------------------------------------------------------------------------------------------------------------------------------------------------------------------------------------------------------------|----------|

|  |     |                                                                                                                                                                         |          |
|--|-----|-------------------------------------------------------------------------------------------------------------------------------------------------------------------------|----------|
|  | 21b | Description of any interim analyses and stopping guidelines, including who will have access to these interim results and make the final decision to terminate the trial | ___18___ |
|--|-----|-------------------------------------------------------------------------------------------------------------------------------------------------------------------------|----------|

|       |    |                                                                                                                                                                                   |          |
|-------|----|-----------------------------------------------------------------------------------------------------------------------------------------------------------------------------------|----------|
| Harms | 22 | Plans for collecting, assessing, reporting, and managing solicited and spontaneously reported adverse events and other unintended effects of trial interventions or trial conduct | ___19___ |
|-------|----|-----------------------------------------------------------------------------------------------------------------------------------------------------------------------------------|----------|

|          |    |                                                                                                                                             |          |
|----------|----|---------------------------------------------------------------------------------------------------------------------------------------------|----------|
| Auditing | 23 | Frequency and procedures for auditing trial conduct, if any, and whether the process will be independent from investigators and the sponsor | ___19___ |
|----------|----|---------------------------------------------------------------------------------------------------------------------------------------------|----------|

**Ethics and dissemination**

|                          |    |                                                                                           |          |
|--------------------------|----|-------------------------------------------------------------------------------------------|----------|
| Research ethics approval | 24 | Plans for seeking research ethics committee/institutional review board (REC/IRB) approval | ___19___ |
|--------------------------|----|-------------------------------------------------------------------------------------------|----------|

|                     |    |                                                                                                                                                                                                                                  |          |
|---------------------|----|----------------------------------------------------------------------------------------------------------------------------------------------------------------------------------------------------------------------------------|----------|
| Protocol amendments | 25 | Plans for communicating important protocol modifications (eg, changes to eligibility criteria, outcomes, analyses) to relevant parties (eg, investigators, REC/IRBs, trial participants, trial registries, journals, regulators) | ___19___ |
|---------------------|----|----------------------------------------------------------------------------------------------------------------------------------------------------------------------------------------------------------------------------------|----------|





|    |                               |     |                                                                                                                                                                                                                                                                                     |                |
|----|-------------------------------|-----|-------------------------------------------------------------------------------------------------------------------------------------------------------------------------------------------------------------------------------------------------------------------------------------|----------------|
| 1  |                               |     |                                                                                                                                                                                                                                                                                     |                |
| 2  |                               |     |                                                                                                                                                                                                                                                                                     |                |
| 3  | Consent or assent             | 26a | Who will obtain informed consent or assent from potential trial participants or authorised surrogates, and how (see Item 32)                                                                                                                                                        | ___19___       |
| 4  |                               |     |                                                                                                                                                                                                                                                                                     |                |
| 5  |                               |     |                                                                                                                                                                                                                                                                                     |                |
| 6  |                               | 26b | Additional consent provisions for collection and use of participant data and biological specimens in ancillary studies, if applicable                                                                                                                                               | ___N/A___      |
| 7  |                               |     |                                                                                                                                                                                                                                                                                     |                |
| 8  | Confidentiality               | 27  | How personal information about potential and enrolled participants will be collected, shared, and maintained in order to protect confidentiality before, during, and after the trial                                                                                                | ___19___       |
| 9  |                               |     |                                                                                                                                                                                                                                                                                     |                |
| 10 |                               |     |                                                                                                                                                                                                                                                                                     |                |
| 11 | Declaration of interests      | 28  | Financial and other competing interests for principal investigators for the overall trial and each study site                                                                                                                                                                       | ___20___       |
| 12 |                               |     |                                                                                                                                                                                                                                                                                     |                |
| 13 |                               |     |                                                                                                                                                                                                                                                                                     |                |
| 14 | Access to data                | 29  | Statement of who will have access to the final trial dataset, and disclosure of contractual agreements that limit such access for investigators                                                                                                                                     | ___19___       |
| 15 |                               |     |                                                                                                                                                                                                                                                                                     |                |
| 16 |                               |     |                                                                                                                                                                                                                                                                                     |                |
| 17 | Ancillary and post-trial care | 30  | Provisions, if any, for ancillary and post-trial care, and for compensation to those who suffer harm from trial participation                                                                                                                                                       | ___N/A___      |
| 18 |                               |     |                                                                                                                                                                                                                                                                                     |                |
| 19 |                               |     |                                                                                                                                                                                                                                                                                     |                |
| 20 | Dissemination policy          | 31a | Plans for investigators and sponsor to communicate trial results to participants, healthcare professionals, the public, and other relevant groups (eg, via publication, reporting in results databases, or other data sharing arrangements), including any publication restrictions | ___20___       |
| 21 |                               |     |                                                                                                                                                                                                                                                                                     |                |
| 22 |                               |     |                                                                                                                                                                                                                                                                                     |                |
| 23 |                               |     |                                                                                                                                                                                                                                                                                     |                |
| 24 |                               |     |                                                                                                                                                                                                                                                                                     |                |
| 25 |                               | 31b | Authorship eligibility guidelines and any intended use of professional writers                                                                                                                                                                                                      | ___20___       |
| 26 |                               |     |                                                                                                                                                                                                                                                                                     |                |
| 27 |                               | 31c | Plans, if any, for granting public access to the full protocol, participant-level dataset, and statistical code                                                                                                                                                                     | ___N/A___      |
| 28 |                               |     |                                                                                                                                                                                                                                                                                     |                |
| 29 | <b>Appendices</b>             |     |                                                                                                                                                                                                                                                                                     |                |
| 30 |                               |     |                                                                                                                                                                                                                                                                                     |                |
| 31 | Informed consent materials    | 32  | Model consent form and other related documentation given to participants and authorised surrogates                                                                                                                                                                                  | ___Appendix___ |
| 32 |                               |     |                                                                                                                                                                                                                                                                                     |                |
| 33 |                               |     |                                                                                                                                                                                                                                                                                     |                |
| 34 | Biological specimens          | 33  | Plans for collection, laboratory evaluation, and storage of biological specimens for genetic or molecular analysis in the current trial and for future use in ancillary studies, if applicable                                                                                      | ___N/A___      |
| 35 |                               |     |                                                                                                                                                                                                                                                                                     |                |
| 36 |                               |     |                                                                                                                                                                                                                                                                                     |                |

37 \*It is strongly recommended that this checklist be read in conjunction with the SPIRIT 2013 Explanation & Elaboration for important clarification on the items.  
 38 Amendments to the protocol should be tracked and dated. The SPIRIT checklist is copyrighted by the SPIRIT Group under the Creative Commons  
 39 "[Attribution-NonCommercial-NoDerivs 3.0 Unported](https://creativecommons.org/licenses/by-nc-nd/3.0/)" license.  
 40
